# Supplementary material for: Conformational Preferences and Antiproliferative Activity of Peptidomimetics Containing Methyl 1′-Aminoferrocene-1-carboxylate and Turn-Forming Homo- and Heterochiral Pro-Ala Motifs
Source: MDPI journal article supplement (doi:10.3390/ijms222413532), 2021-12-16
Supplement: s1 [file s1]

**Conformational preferences and antiproliferative activity of peptidomimetics containing  
methyl 1'-aminoferrocene-1-carboxylate and turn forming homo- and heterochiral Pro-Ala motifs**

Monika Kovačević, Mojca Čakić Semenčić, Kristina Radošević, Krešimir Molčanov, Sunčica Roca, Lucija Šimunović, Ivan Kodrin and Lidija Barišić

*Supplementary Material*

**Content:**

|                                                                                                           |           |
|-----------------------------------------------------------------------------------------------------------|-----------|
| <b>DFT data</b>                                                                                           | <b>2</b>  |
| <b>MS, NMR and IR data</b>                                                                                |           |
| Boc-D-Pro-L-Ala-NH-Fn-COOMe ( <b>2</b> )                                                                  | <b>3</b>  |
| Ac-D-Pro-L-Ala-NH-Fn-COOMe ( <b>3</b> )                                                                   | <b>17</b> |
| Boc-L-Pro-L-Ala-NH-Fn-COOMe ( <b>4</b> )                                                                  | <b>30</b> |
| Ac-L-Pro-L-Ala-NH-Fn-COOMe ( <b>5</b> )                                                                   | <b>44</b> |
| The influence of increased temperature on the <i>cis/trans</i> signals coalescence in peptides <b>2-5</b> | <b>57</b> |
| The influence of DMSO on <i>cis-trans</i> isomerization of a proline imide bond in peptides <b>2-5</b>    | <b>59</b> |
| <b>X-ray crystal structure analysis</b>                                                                   | <b>61</b> |
| <b>Biological evaluation</b>                                                                              | <b>67</b> |

## DFT data

**Table S1.** Relative energies (reported energies refer to standard Gibbs free energies at 298 K in kJ mol<sup>-1</sup>) of the most stable conformers of compounds **2–5**. Optimizations performed at the B3LYP-D3/6-311+G(d,p), LanL2DZ for Fe, level of theory, SMD model for solvent effects. Stereochemical descriptors and helicity determined from the value of pseudotorsion angles, intramolecular hydrogen bond patterns (IHB) labelled as in Figure 5, X–Y distances (in Å) of the selected X–H...Y hydrogen bonds connecting the *n*-membered rings.

| type       | stereochemical descriptors | $\Delta E$ / kJ mol <sup>-1</sup> | $\omega$ / °<br>pseudotorsion angle | IHBs pattern | NH <sub>Fe</sub> ...O=C <sub>Boc/Ac</sub><br>10-membered | NH <sub>Ala</sub> ...O=C <sub>COOMe</sub><br>9-membered |
|------------|----------------------------|-----------------------------------|-------------------------------------|--------------|----------------------------------------------------------|---------------------------------------------------------|
| <b>2-1</b> | <i>P</i> -1,2'             | 0.00                              | +43.2                               | <b>A</b>     | 2.95                                                     | 2.98                                                    |
| <b>2-2</b> | <i>P</i> -1,2'             | 1.41                              | +43.2                               | <b>A</b>     | 2.97                                                     | 2.98                                                    |
| <b>2-3</b> | <i>M</i> -1,1'             | 1.79                              | −35.1                               | <b>A</b>     | 2.91                                                     | 2.89                                                    |
| <b>3-1</b> | <i>P</i> -1,2'             | 0.00                              | +41.2                               | <b>A</b>     | 2.92                                                     | 2.96                                                    |
| <b>3-2</b> | <i>M</i> -1,1'             | 0.06                              | −32.7                               | <b>A</b>     | 2.90                                                     | 2.93                                                    |
| <b>3-3</b> | <i>M</i> -1,1'             | 0.87                              | −31.8                               | <b>A</b>     | 2.96                                                     | 2.90                                                    |
| <b>3-4</b> | <i>P</i> -1,2'             | 3.49                              | +40.8                               | <b>A</b>     | 2.96                                                     | 2.97                                                    |
| <b>4-1</b> | <i>M</i> -1,1'             | 0.00                              | −28.4                               | <b>B</b>     |                                                          | 2.93                                                    |
| <b>4-2</b> | <i>M</i> -1,2'             | 0.71                              | −74.1                               | <b>C</b>     | 2.92                                                     |                                                         |
| <b>4-3</b> | <i>M</i> -1,1'             | 2.38                              | −24.2                               | <b>C</b>     | 2.98                                                     |                                                         |
| <b>4-4</b> | <i>M</i> -1,2'             | 2.65                              | −79.0                               | <b>C</b>     | 2.88                                                     |                                                         |
| <b>4-5</b> | <i>M</i> -1,1'             | 3.98                              | −27.7                               | <b>B</b>     |                                                          | 2.92                                                    |
| <b>5-1</b> | <i>M</i> -1,1'             | 0.00                              | −20.5                               | <b>A</b>     | 3.16                                                     | 3.21                                                    |
| <b>5-2</b> | <i>M</i> -1,1'             | 4.60                              | −24.3                               | <b>B</b>     |                                                          | 2.93                                                    |
| <b>5-3</b> | <i>M</i> -1,1'             | 5.98                              | −27.9                               | <b>B</b>     |                                                          | 2.93                                                    |

**Boc-D-Pro-L-Ala-NH-Fn-COOMe (2)**

| Ion type | Calc. mass | Measured mass | Mass error / ppm | Mol. Formula                                                     | Int. CAL    |
|----------|------------|---------------|------------------|------------------------------------------------------------------|-------------|
| M+       | 527.1719   | 527.1708      | 2.1              | C <sub>25</sub> H <sub>33</sub> N <sub>3</sub> O <sub>6</sub> Fe | azitromicin |

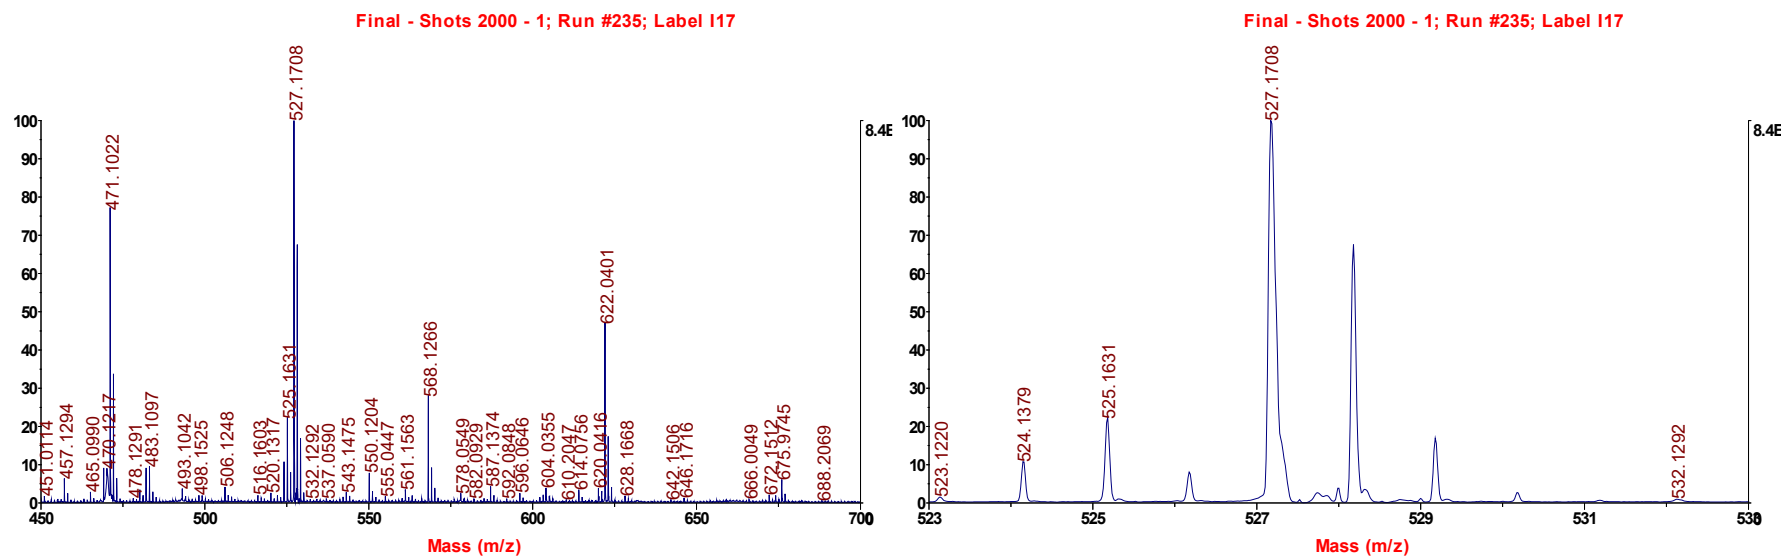

*Figure S2.* HRMS spectrum of compound **2**.

## Qualitative Analysis Report

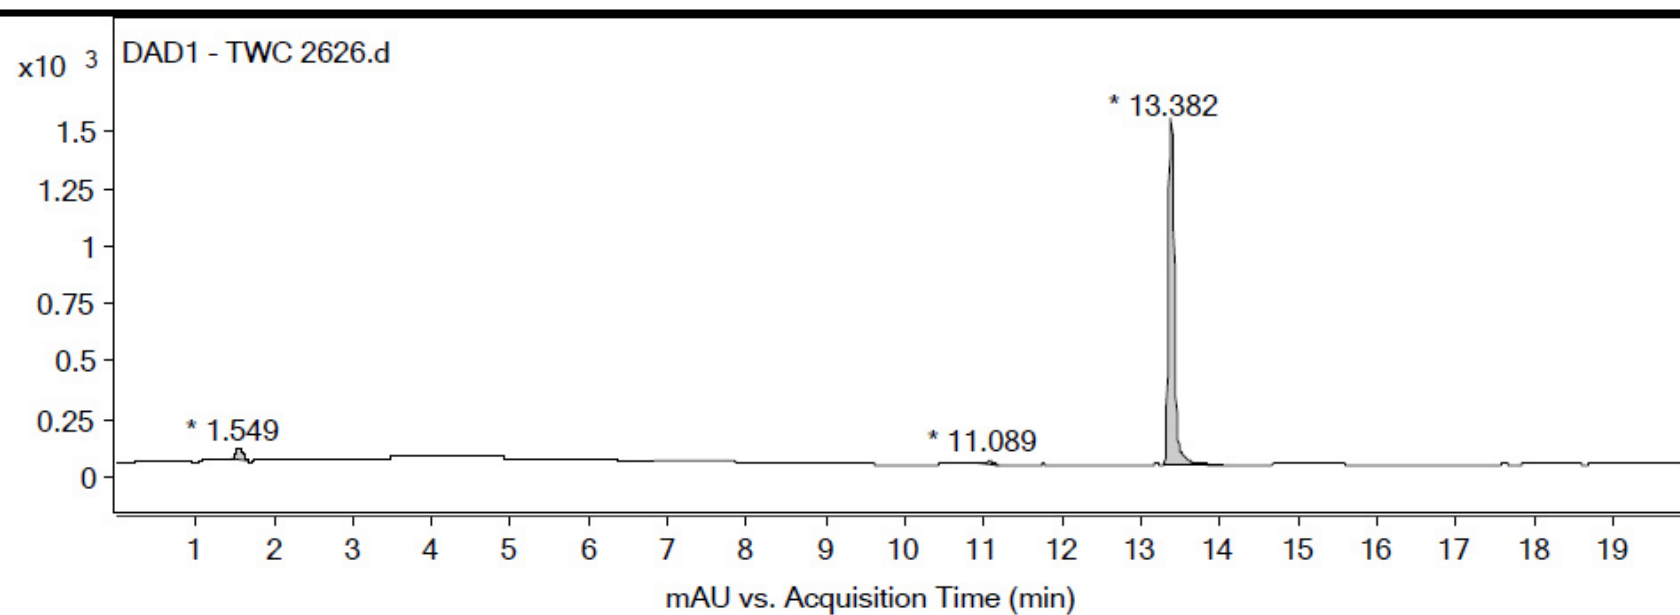

### Integration Peak List

| Peak | Start  | RT     | End    | Height  | Area    | Area % |
|------|--------|--------|--------|---------|---------|--------|
| 1    | 1.462  | 1.549  | 1.656  | 45.16   | 305.73  | 3.78   |
| 2    | 10.916 | 11.089 | 11.189 | 16.1    | 81.62   | 1.01   |
| 3    | 13.296 | 13.382 | 14.062 | 1513.94 | 8085.83 | 100    |

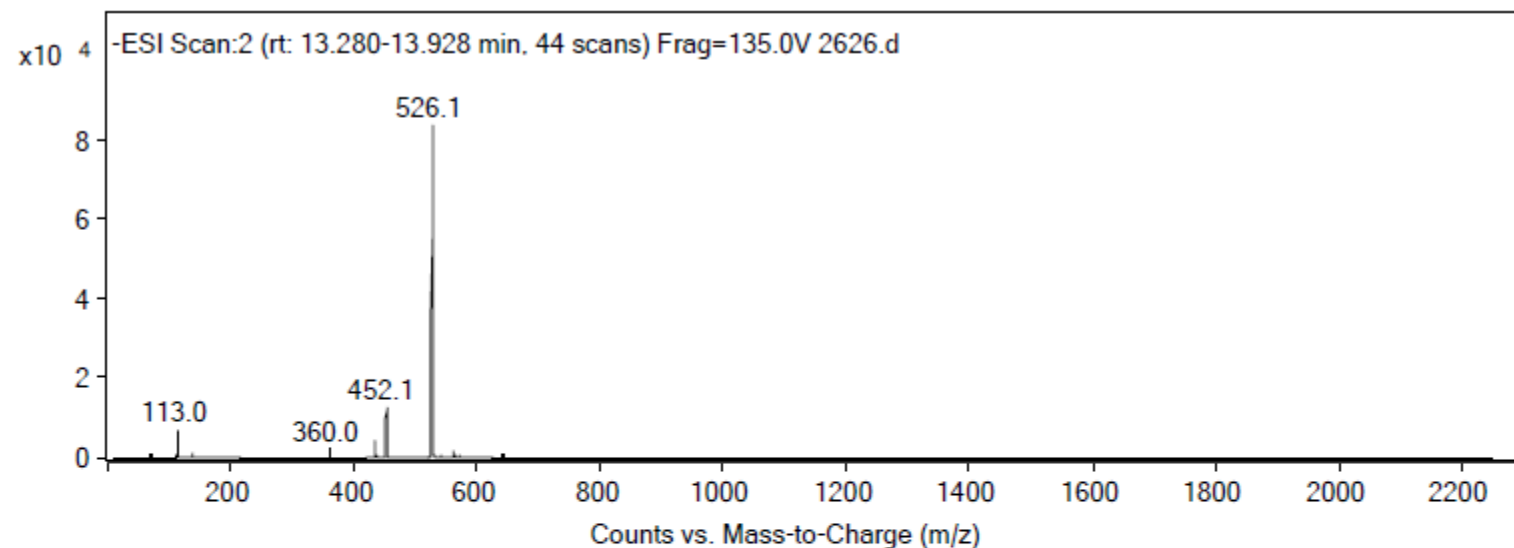

**Peak List**

| m/z   | z | Abund    |
|-------|---|----------|
| 113   |   | 6729.59  |
| 360   |   | 1854.58  |
| 434.1 |   | 3931.85  |
| 452.1 | 1 | 12571.55 |
| 453.1 | 1 | 3524.29  |
| 524.1 |   | 4976.46  |
| 526.1 | 1 | 83682.7  |
| 527.2 | 1 | 25827.74 |
| 528.1 | 1 | 5049.3   |
| 562.1 |   | 1647.65  |

*Figure S3.* HPLC-ESI spectra of compound **2**.

1.4460  
1.4748  
1.4870  
1.5001  
1.8667  
1.8764  
1.8866  
1.8977  
2.0863  
2.1925  
3.4641  
3.4665  
3.5196  
3.5304  
3.5368  
3.5418  
3.5478  
3.7938  
3.9596  
4.0117  
4.1606  
4.3535  
4.4092  
4.5883  
4.7220  
4.8148  
5.0985  
8.3762

3.4641  
3.4665  
3.5196  
3.5304  
3.5368  
3.5418  
3.5478  
3.7938  
3.9596  
4.0117  
4.1606  
4.3535  
4.4092  
4.5883  
4.7220  
4.8148  
5.0985

PPM

**Figure S4.**  $^1\text{H}$  NMR spectrum of compound **2** ( $c = 5 \times 10^{-2}$  M).

SpinWorks 3: M. Kovacevic 2626 50 mM

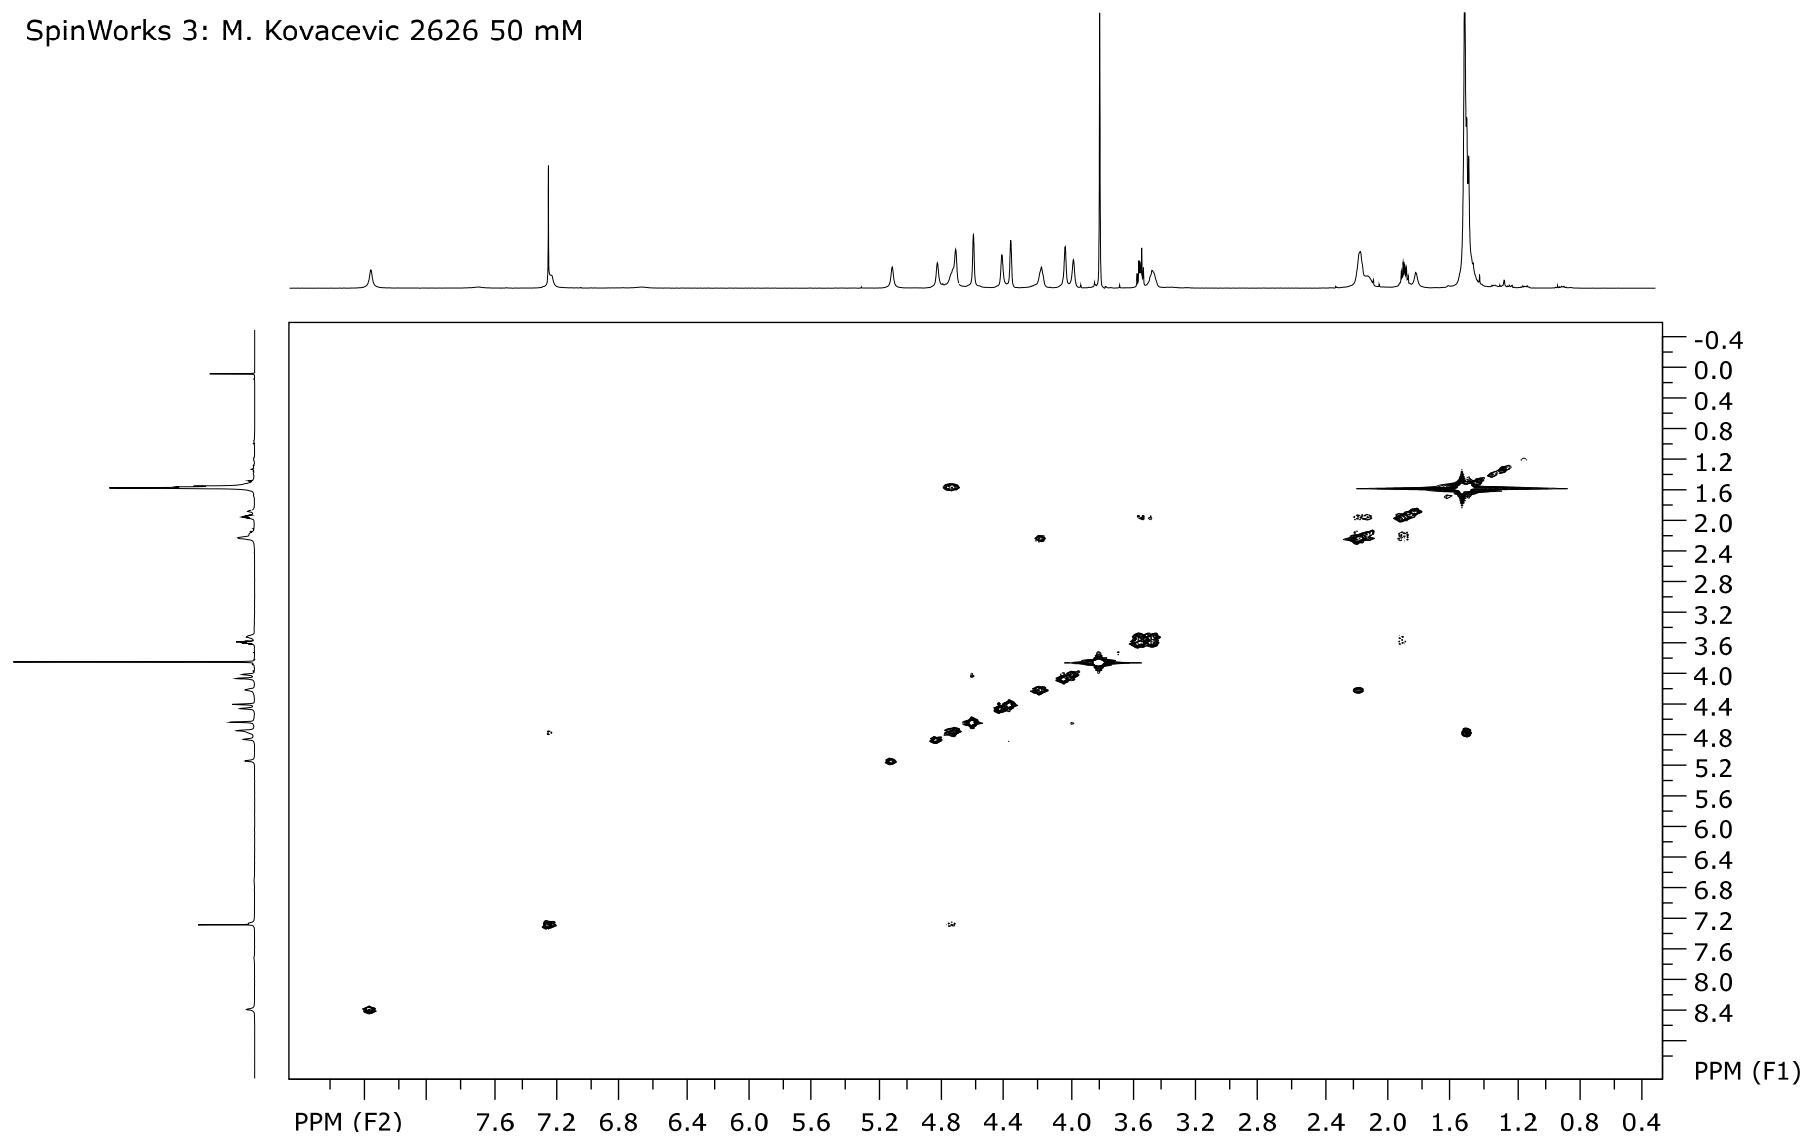

**Figure S5.**  $^1\text{H}$ - $^1\text{H}$  COSY NMR spectrum of compound **2** ( $c = 5 \times 10^{-2}$  M).

SpinWorks 3: M. Kovacevic 2626 50 mM

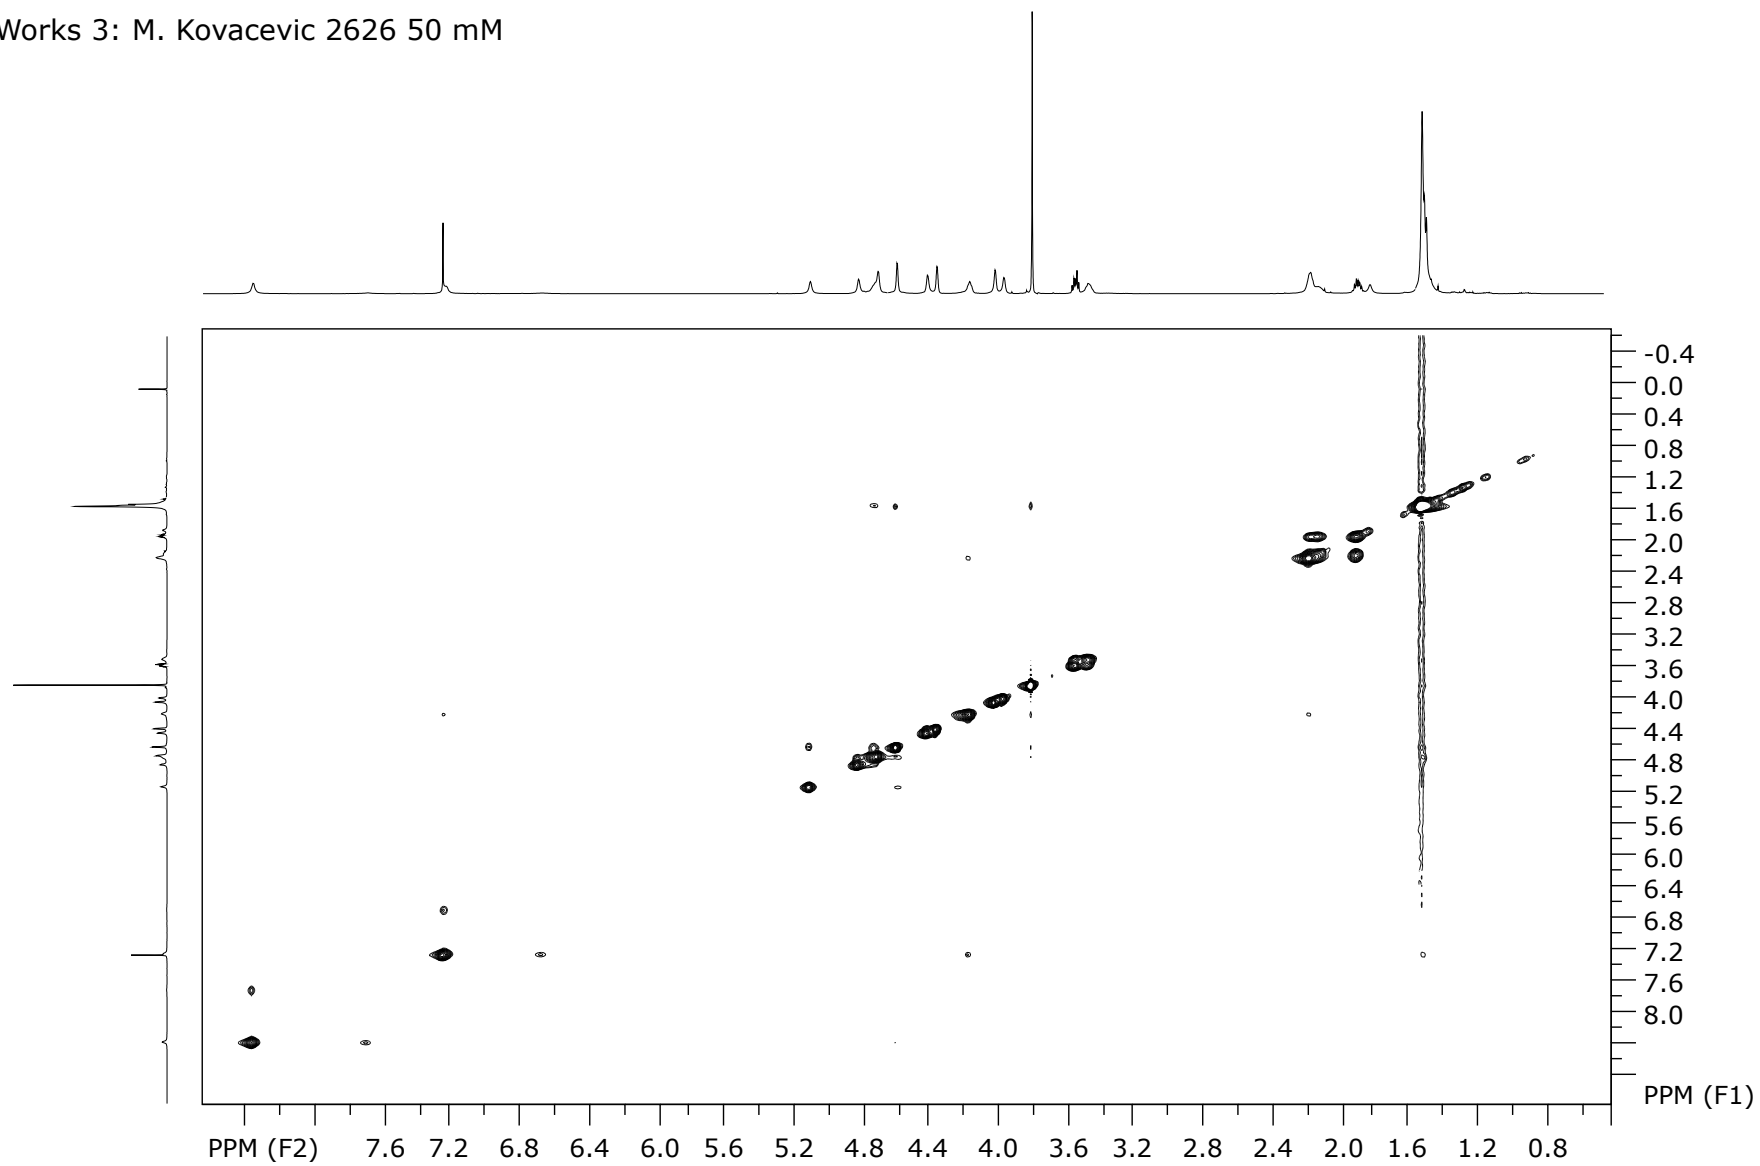

*Figure S6.*  $^1\text{H}$ - $^1\text{H}$  NOESY NMR spectrum of compound **2** ( $c = 5 \times 10^{-2}$  M).



SpinWorks 3: M. Kovacevic 2626 50 mM

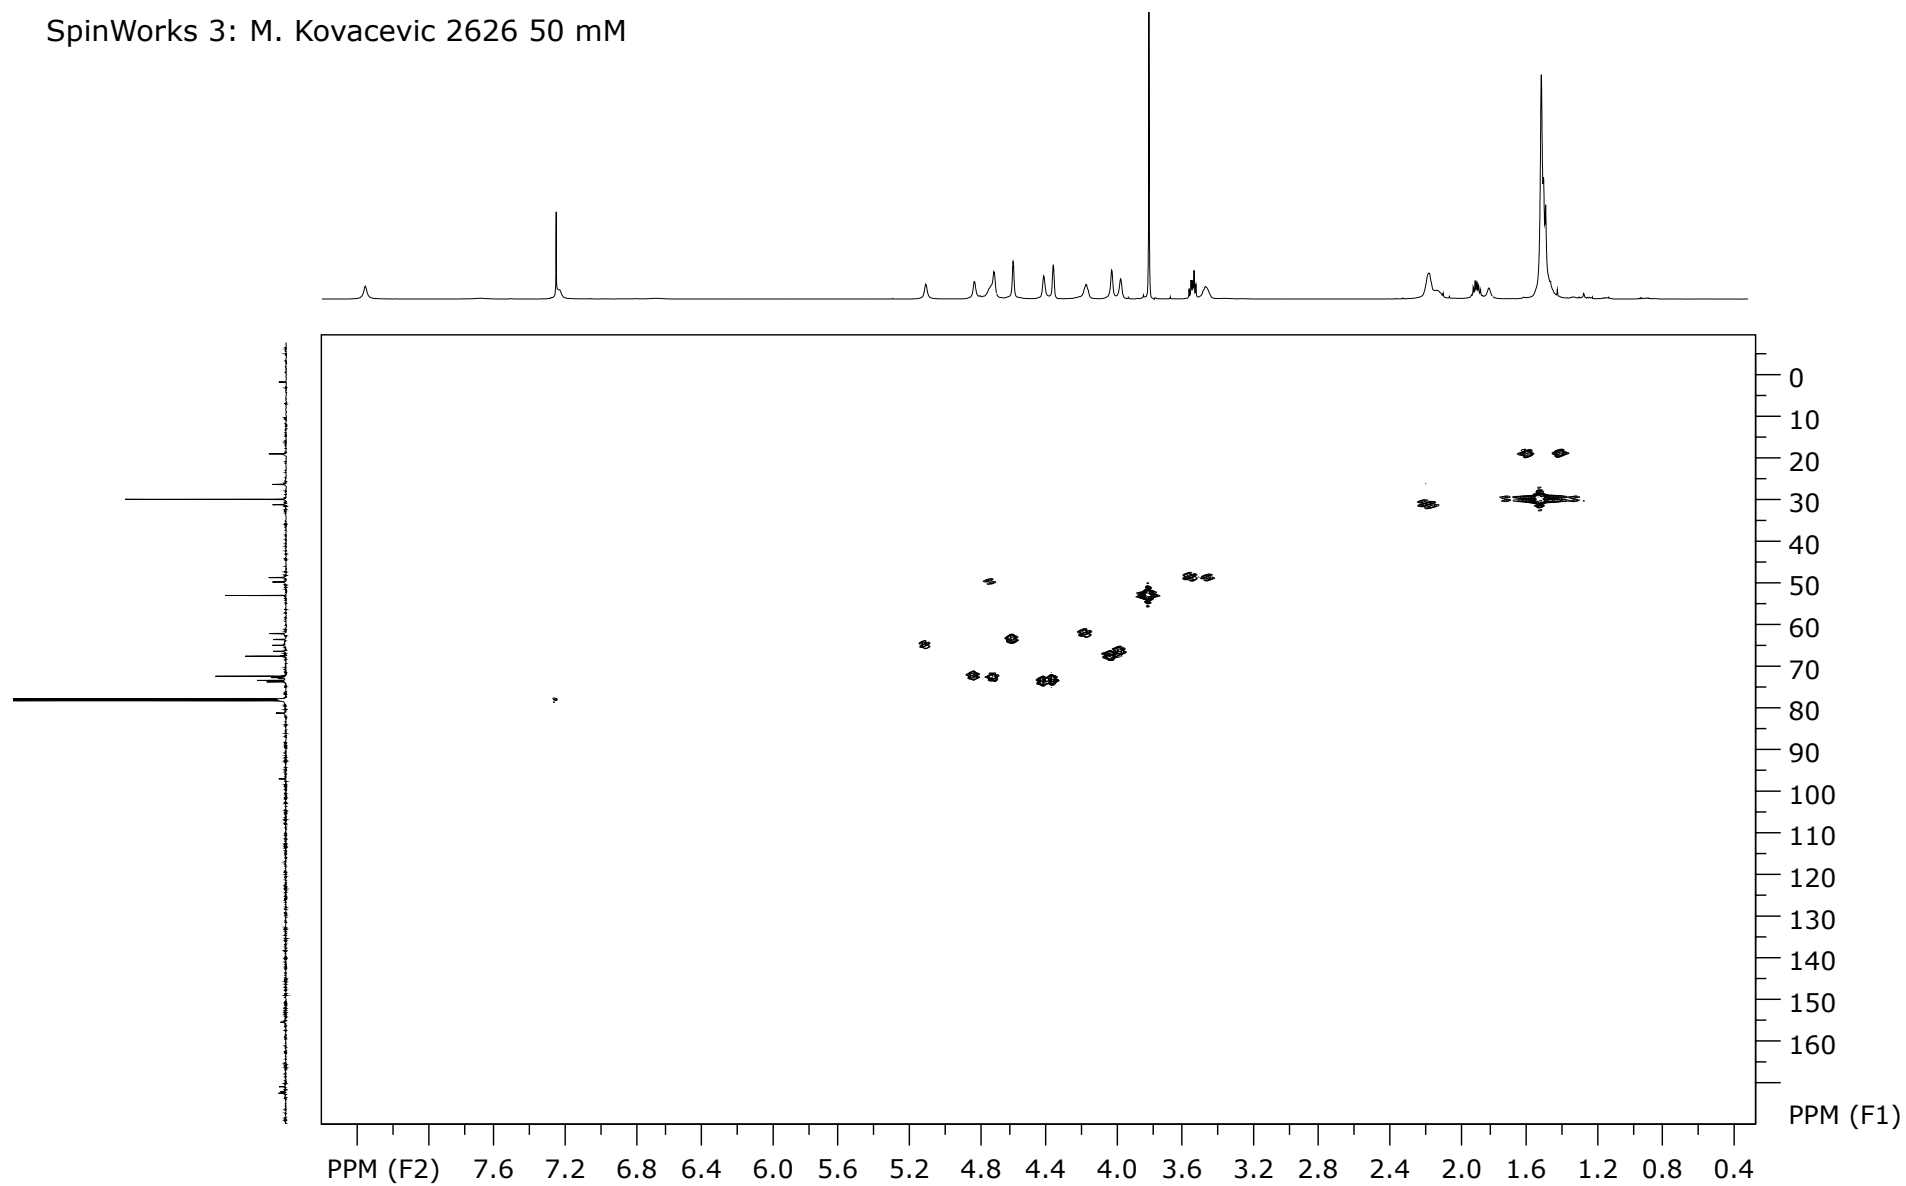

Figure S7.  $^1\text{H}$ - $^{13}\text{C}$  HMQC spectrum of compound **2** ( $c = 5 \times 10^{-2}$  M).

SpinWorks 3: M. Kovacevic 2626 50 mM

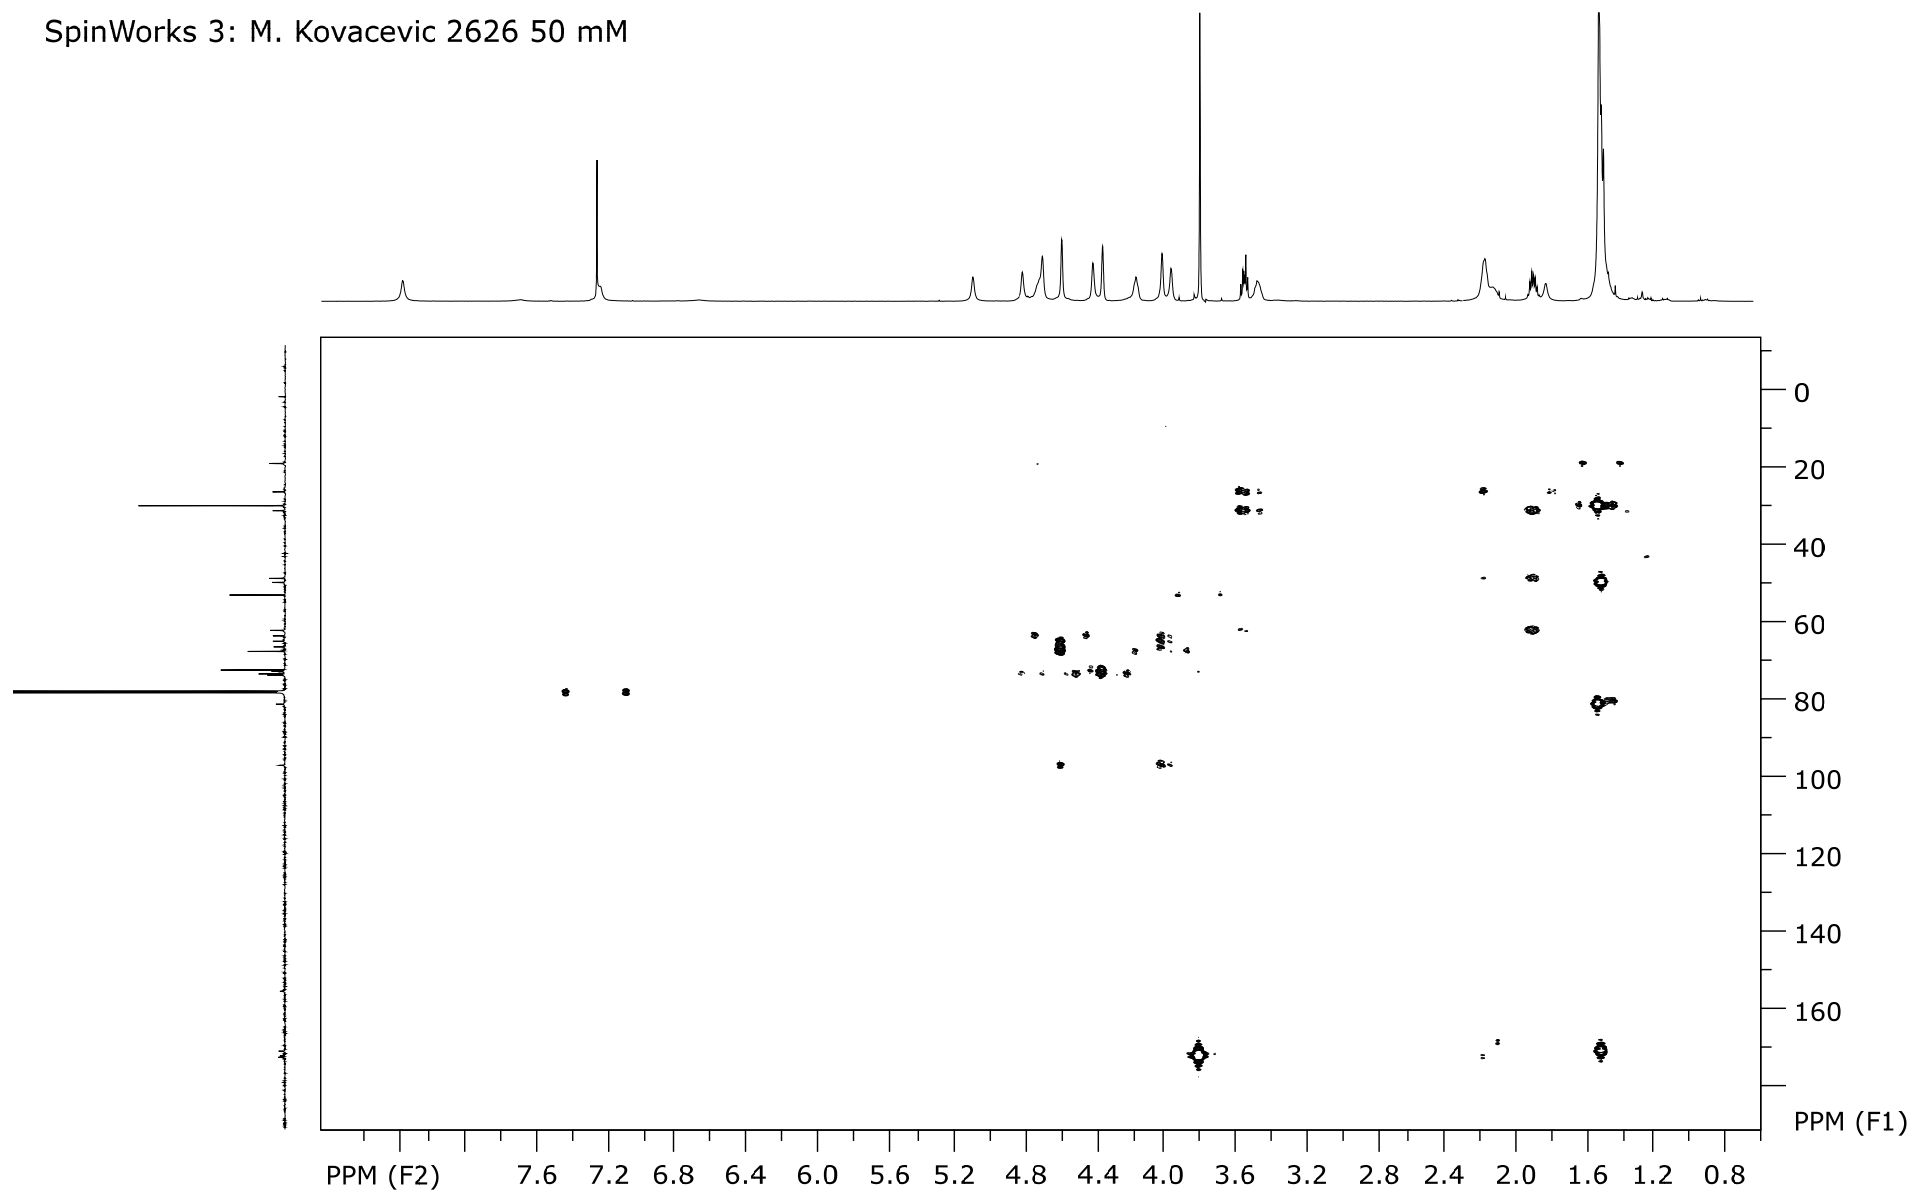

Figure S8.  $^1\text{H}$ - $^{13}\text{C}$  HMBC spectrum of compound **2** ( $c = 5 \times 10^{-2}$  M).

SpinWorks 3: M. Kovacevic 2626 50 mM

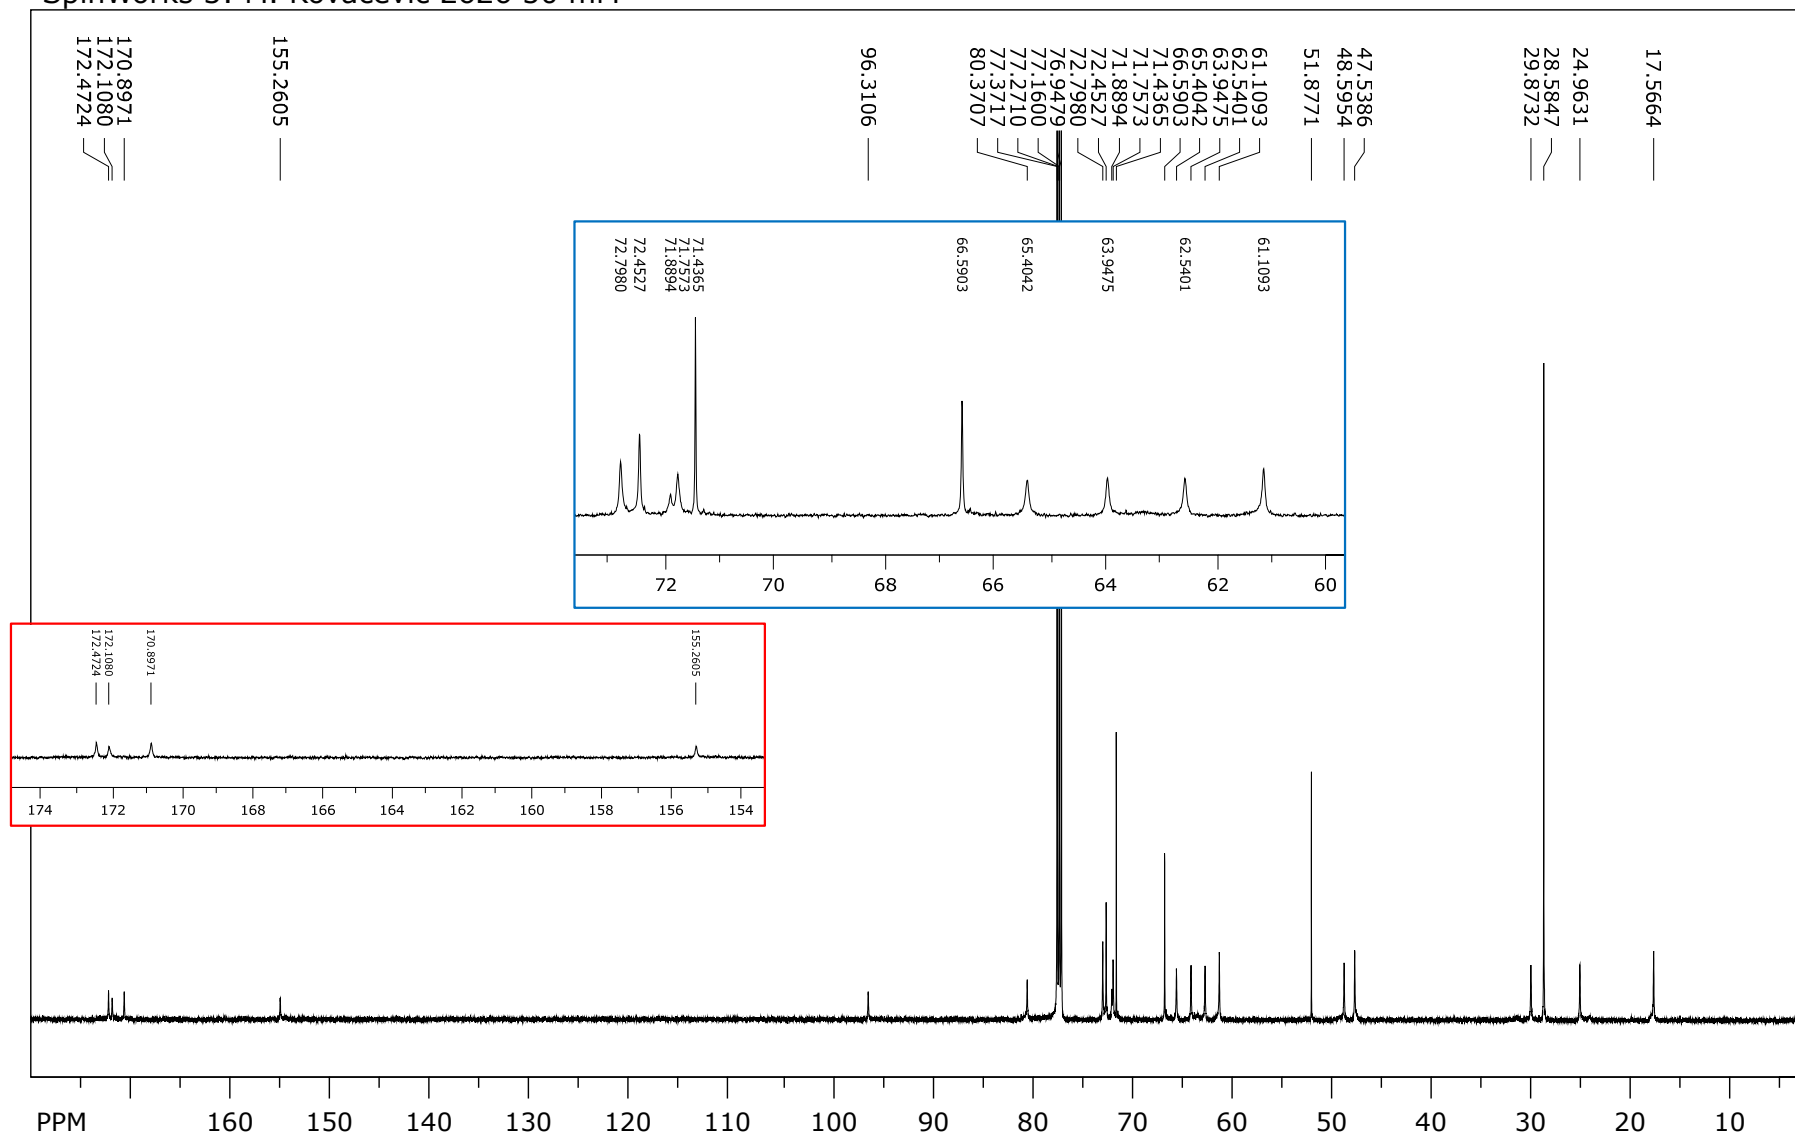

Figure S9.  $^{13}\text{C}\{^1\text{H}\}$  NMR spectrum of compound **2** ( $c = 5 \times 10^{-2}$  M).

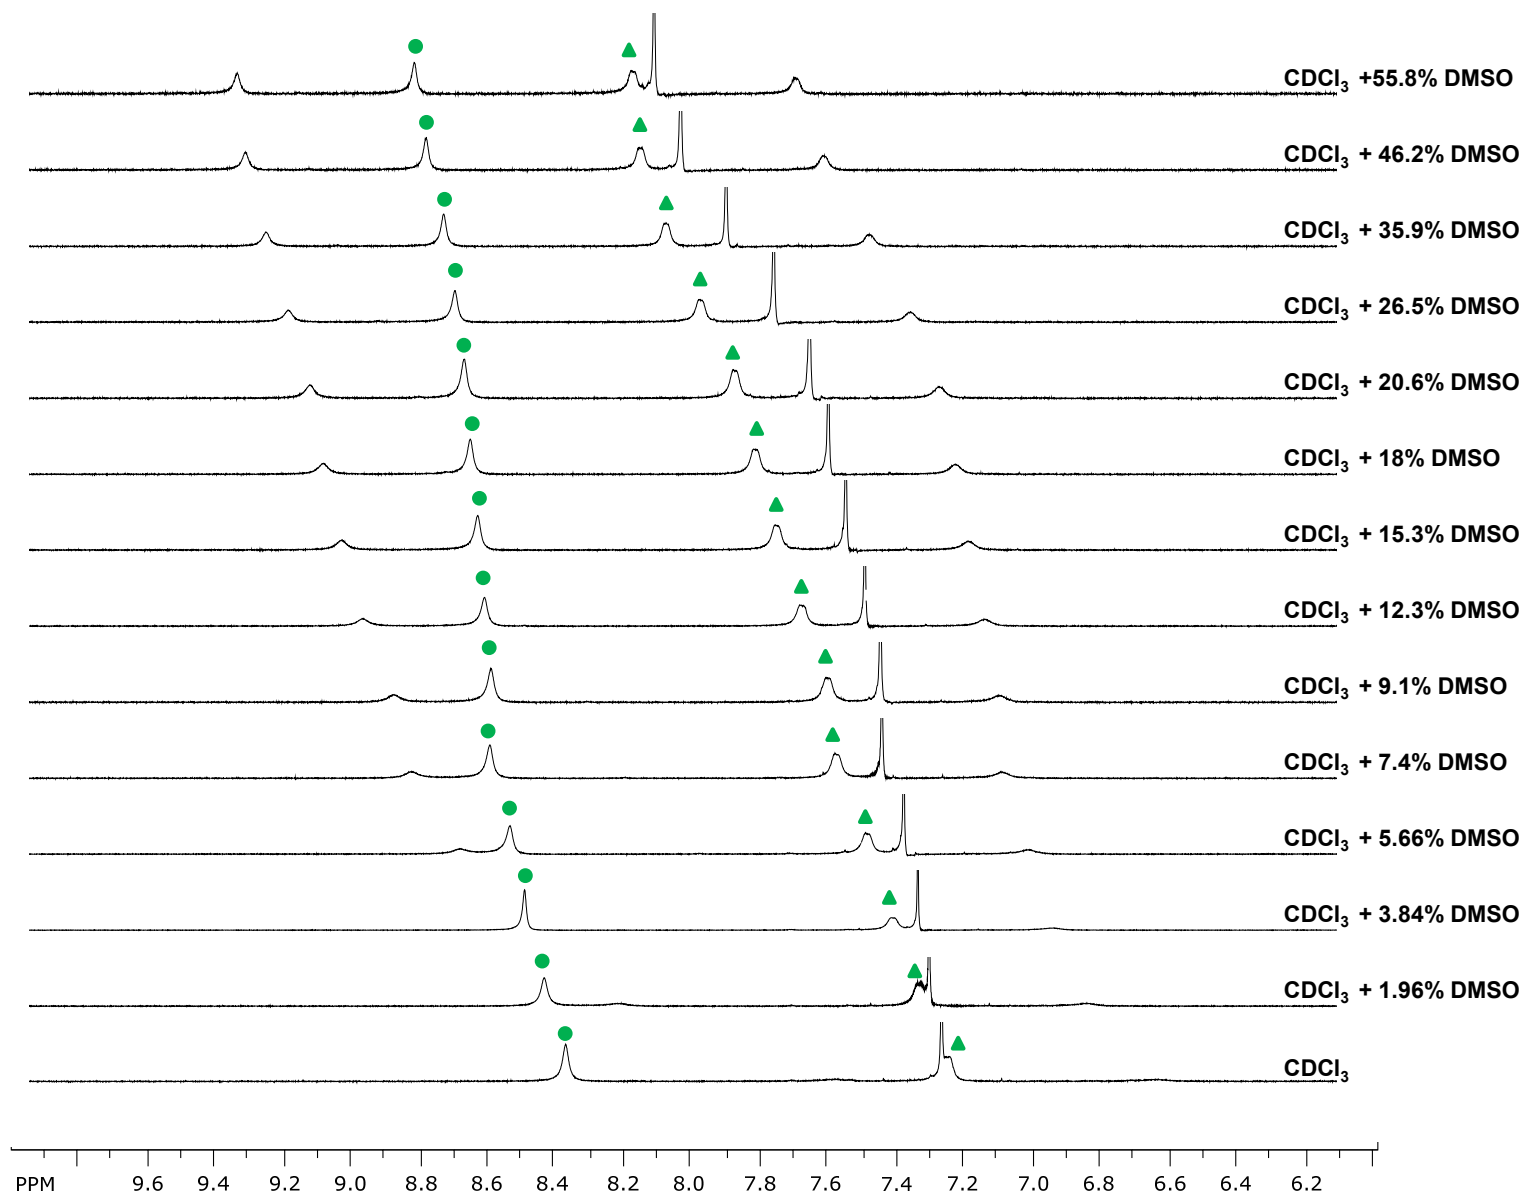

**Figure S10.** Solvent dependence of NH chemical shifts of compound **2** at varying concentrations of DMSO in CDCl<sub>3</sub> ( $c = 2.5 \times 10^{-2}$  M).

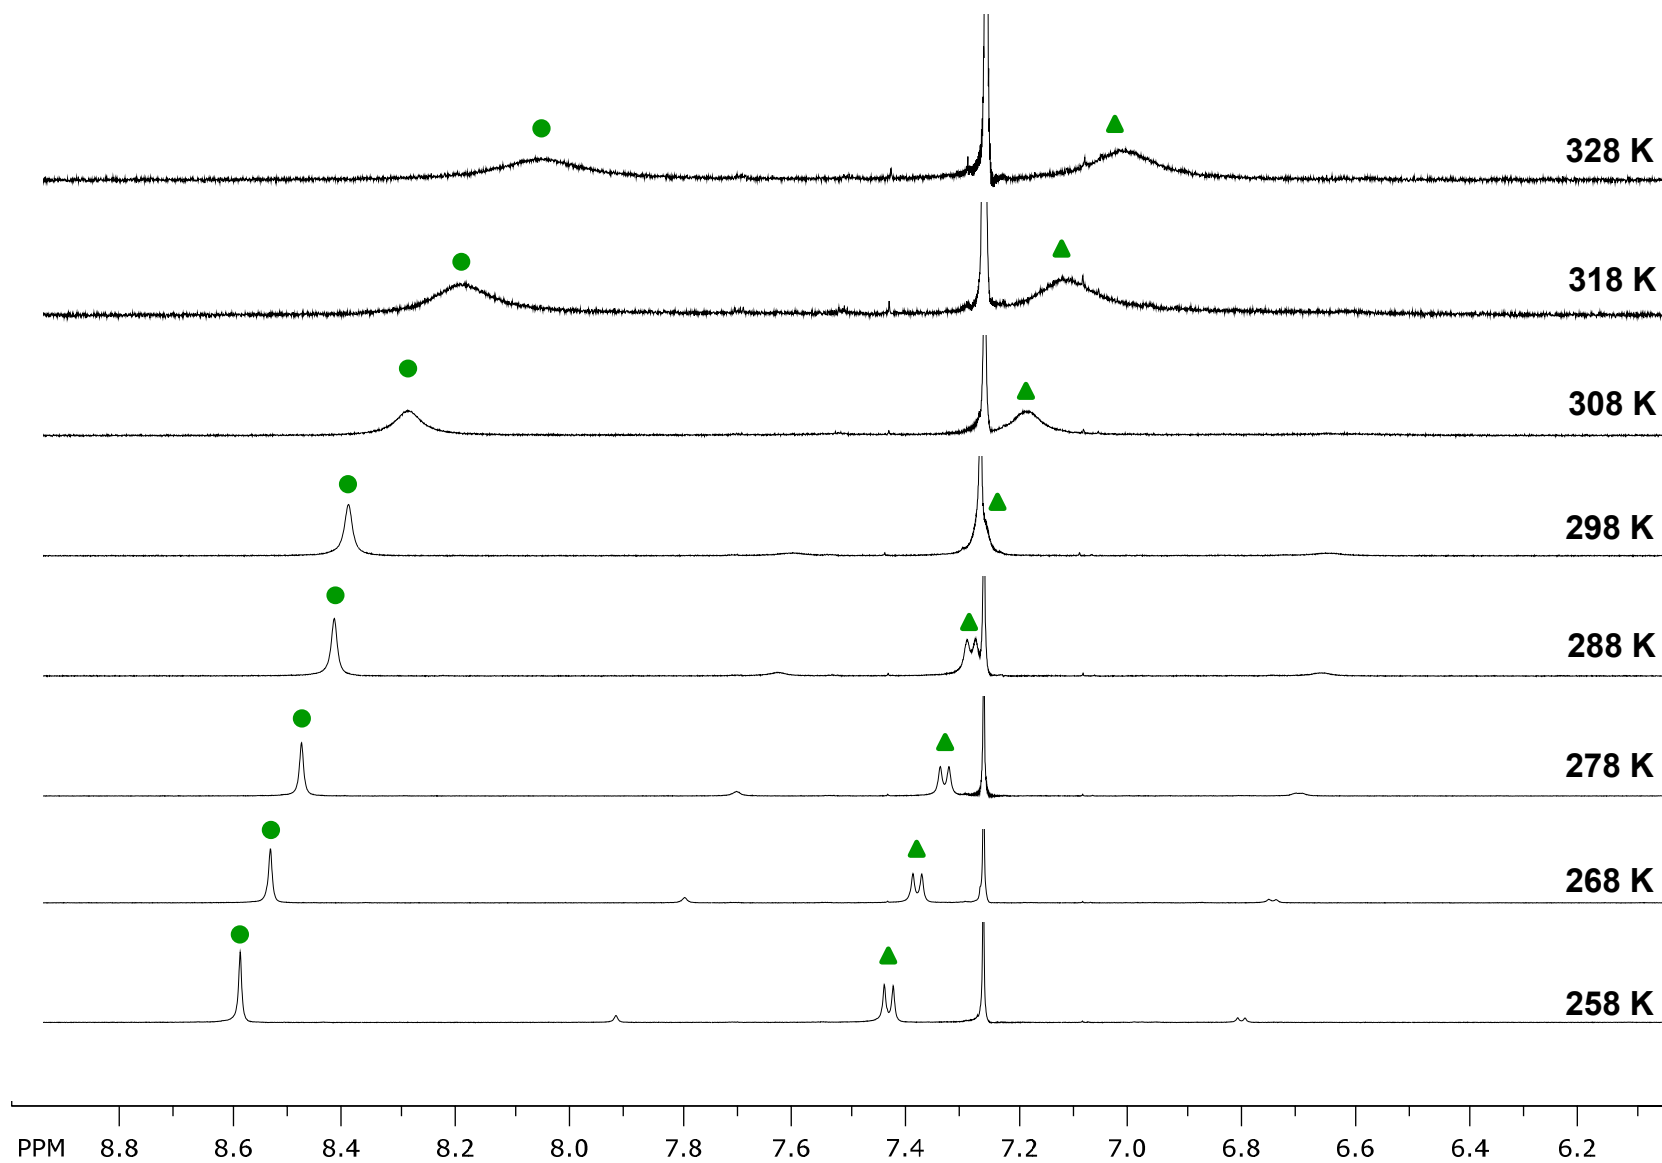

*Figure S11.* Temperature-dependent NH chemical shifts of compound **2** ( $c = 1 \times 10^{-2}$  M).

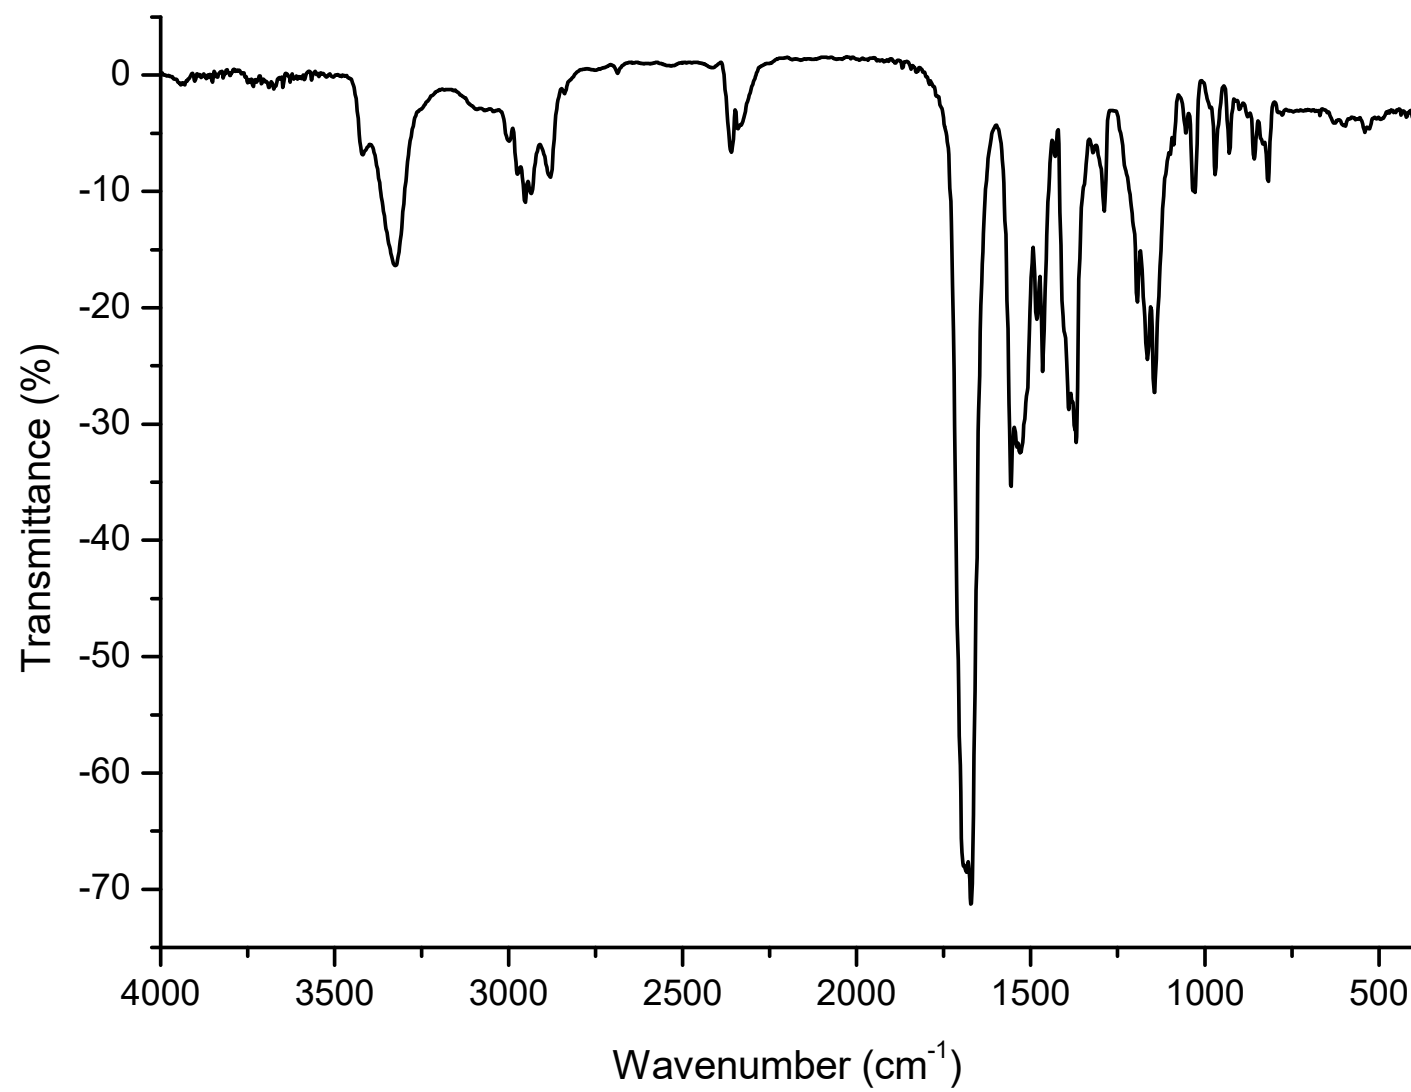

*Figure S12.* IR spectrum of compound **2** ( $c = 5 \times 10^{-2}$  M) in DCM.

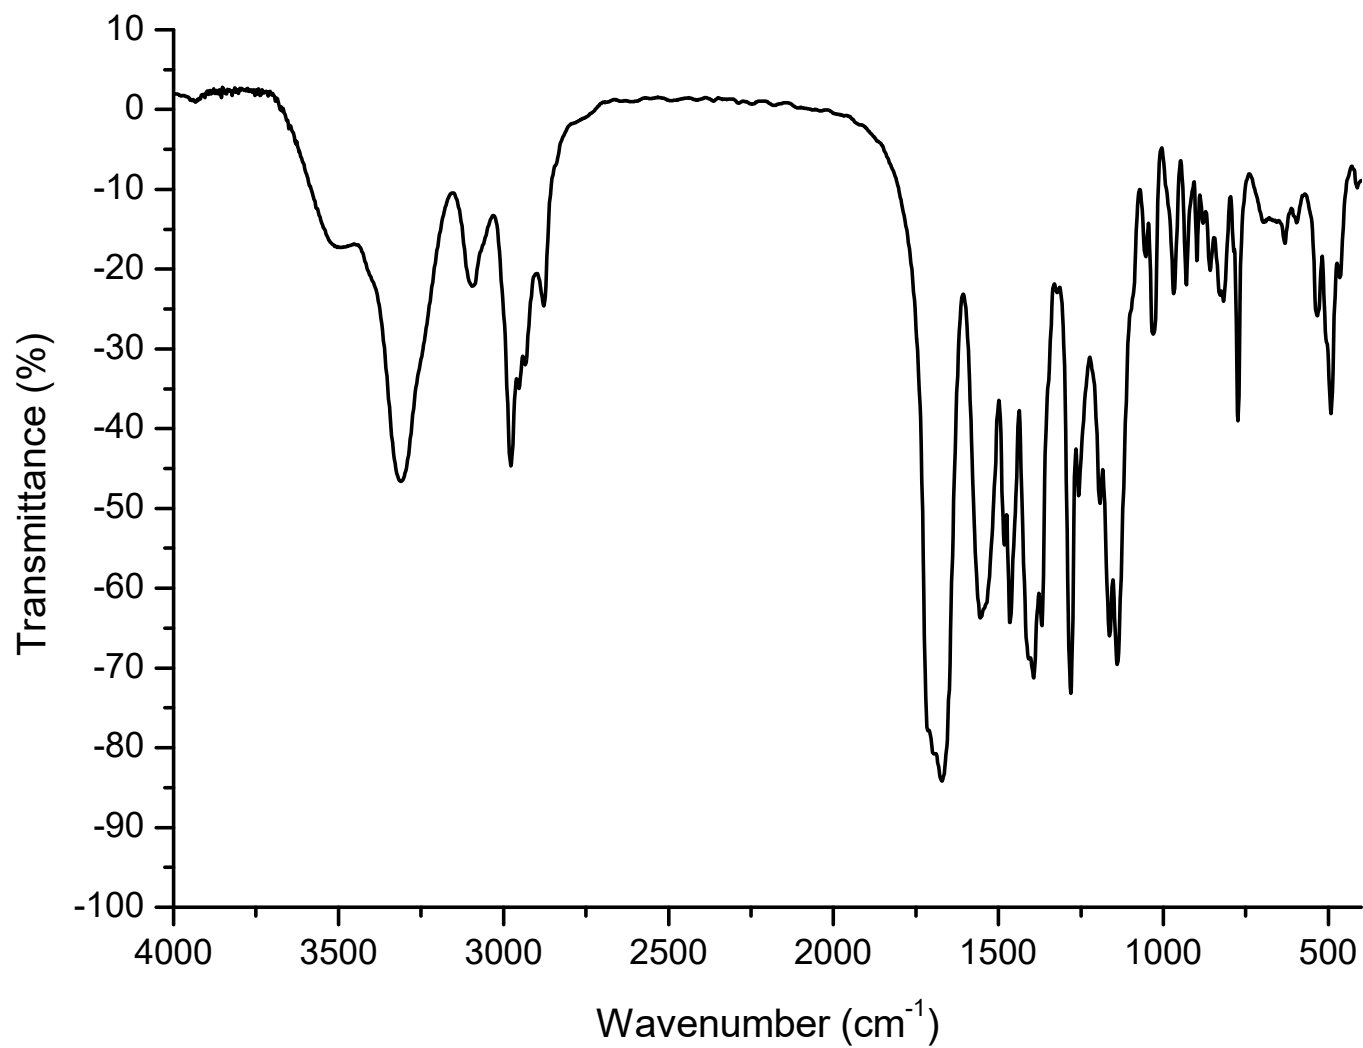

*Figure S13.* IR spectrum of compound **2** (2 mg) in KBr (200 mg).

**Ac-D-Pro-L-Ala-NH-Fn-COOMe (3)**

| Ion type | Calc. mass | Measured mass | Mass error / ppm | Mol. Formula                                                     | Int. CAL    |
|----------|------------|---------------|------------------|------------------------------------------------------------------|-------------|
| M+       | 469.1300   | 469.1280      | 4.5              | C <sub>22</sub> H <sub>27</sub> N <sub>3</sub> O <sub>5</sub> Fe | azitromicin |

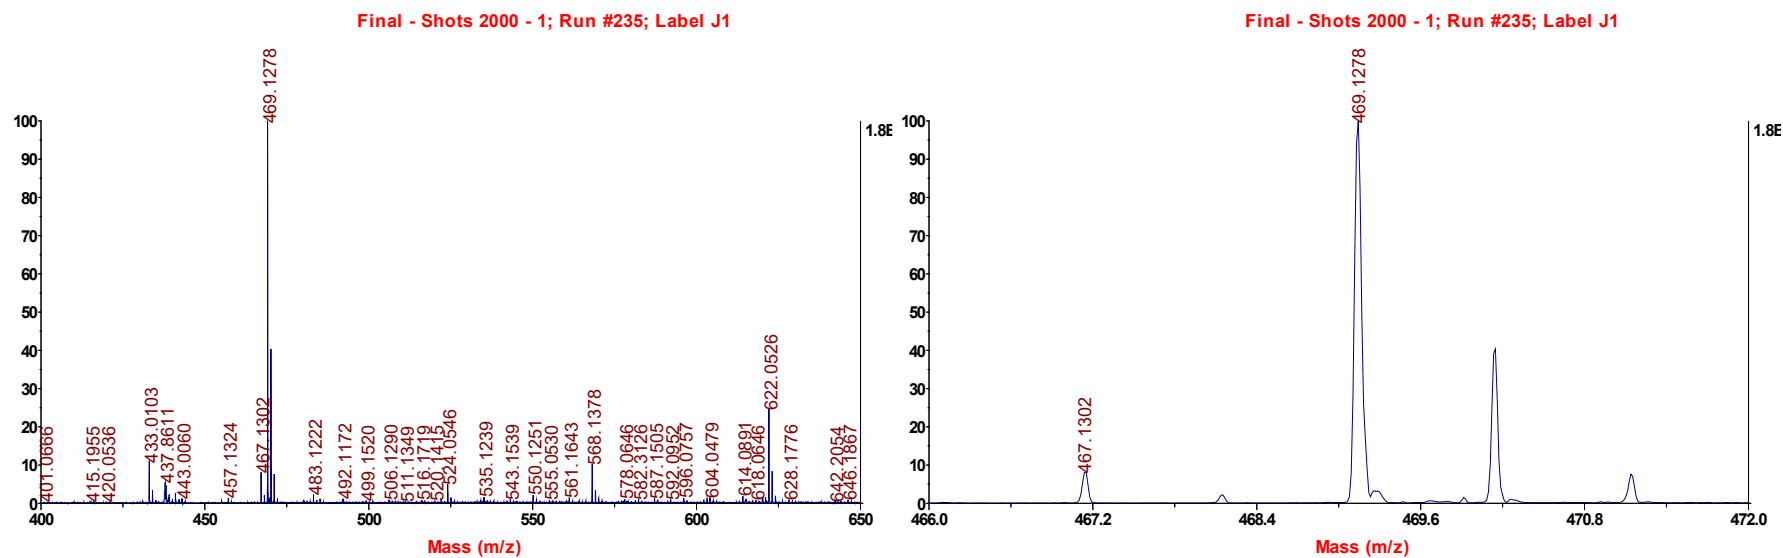

*Figure S14.* HRMS spectrum of compound 3.



## Qualitative Analysis Report

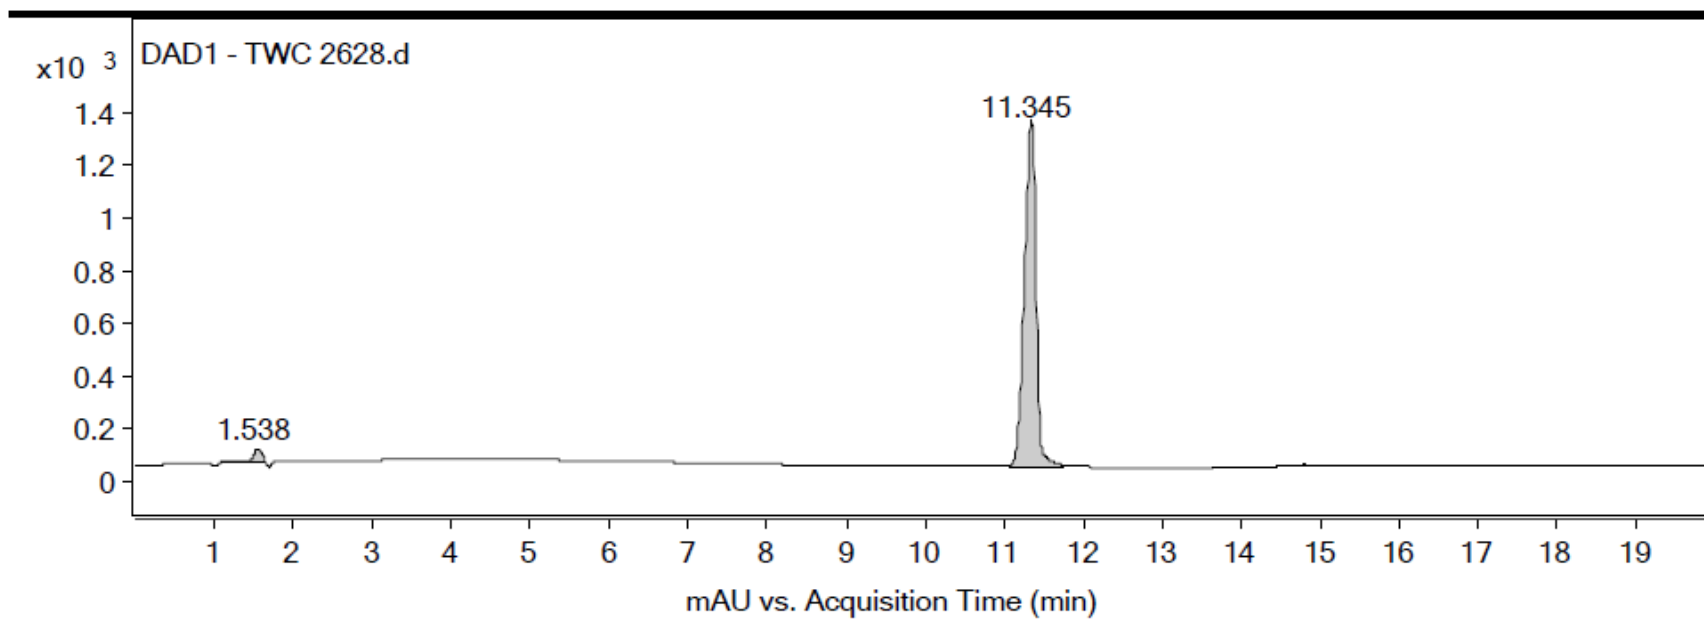

### Integration Peak List

| Peak | Start  | RT     | End    | Height  | Area     | Area % |
|------|--------|--------|--------|---------|----------|--------|
| 1    | 1.091  | 1.538  | 1.649  | 49.75   | 497.3    | 3.62   |
| 2    | 11.065 | 11.345 | 11.751 | 1322.47 | 13733.02 | 100    |

|                            |                           |                         |                        |
|----------------------------|---------------------------|-------------------------|------------------------|
| <b>Spectrum Source</b>     | <b>Fragmentor Voltage</b> | <b>Collision Energy</b> | <b>Ionization Mode</b> |
| Peak (1) in "+/- TIC Scan" |                           | 0                       | ESI                    |

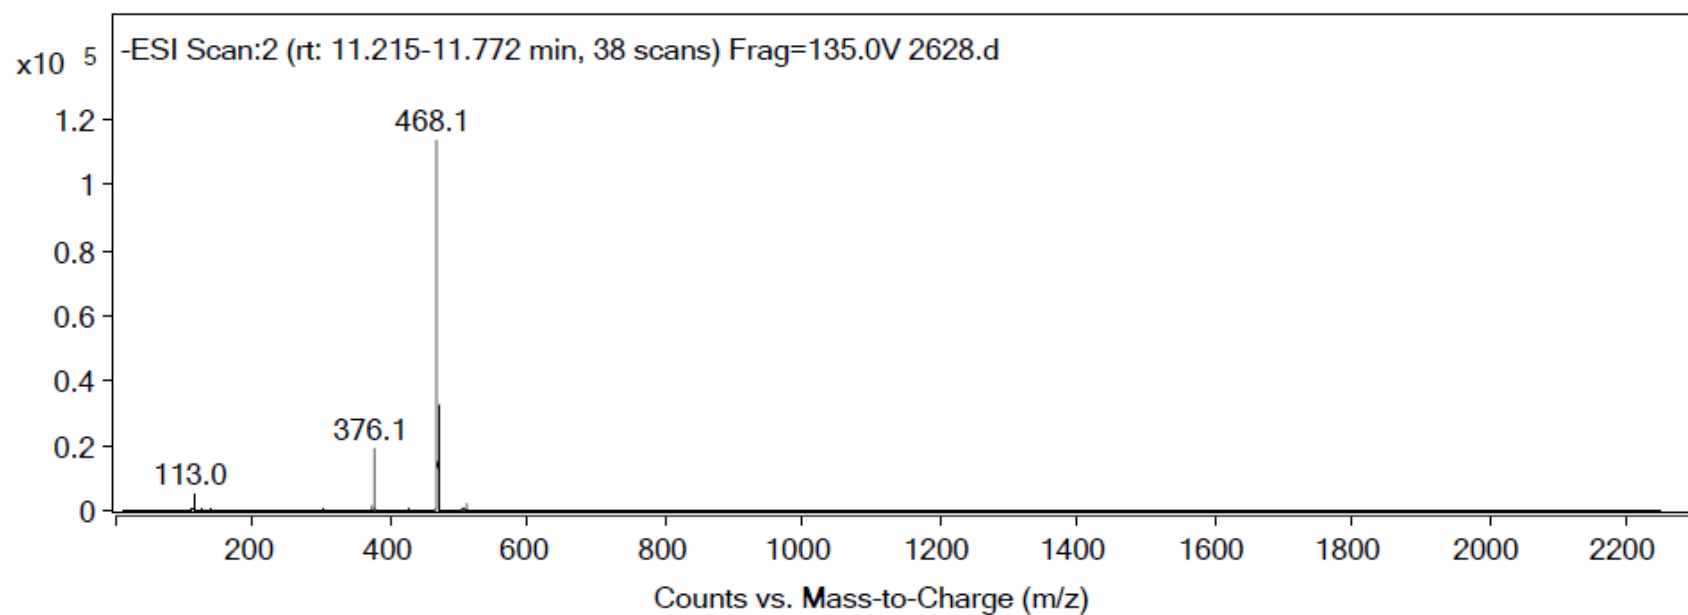

**Peak List**

| m/z   | z | Abund     |
|-------|---|-----------|
| 113   |   | 5043.04   |
| 374   |   | 1191.55   |
| 376.1 | 1 | 19153.22  |
| 377   | 1 | 3753.97   |
| 466.1 |   | 7309.16   |
| 468.1 | 1 | 113881.13 |
| 469.1 | 1 | 32806.95  |
| 470.1 | 1 | 5590.01   |

Figure S15. HPLC-ESI spectra of compound 3.

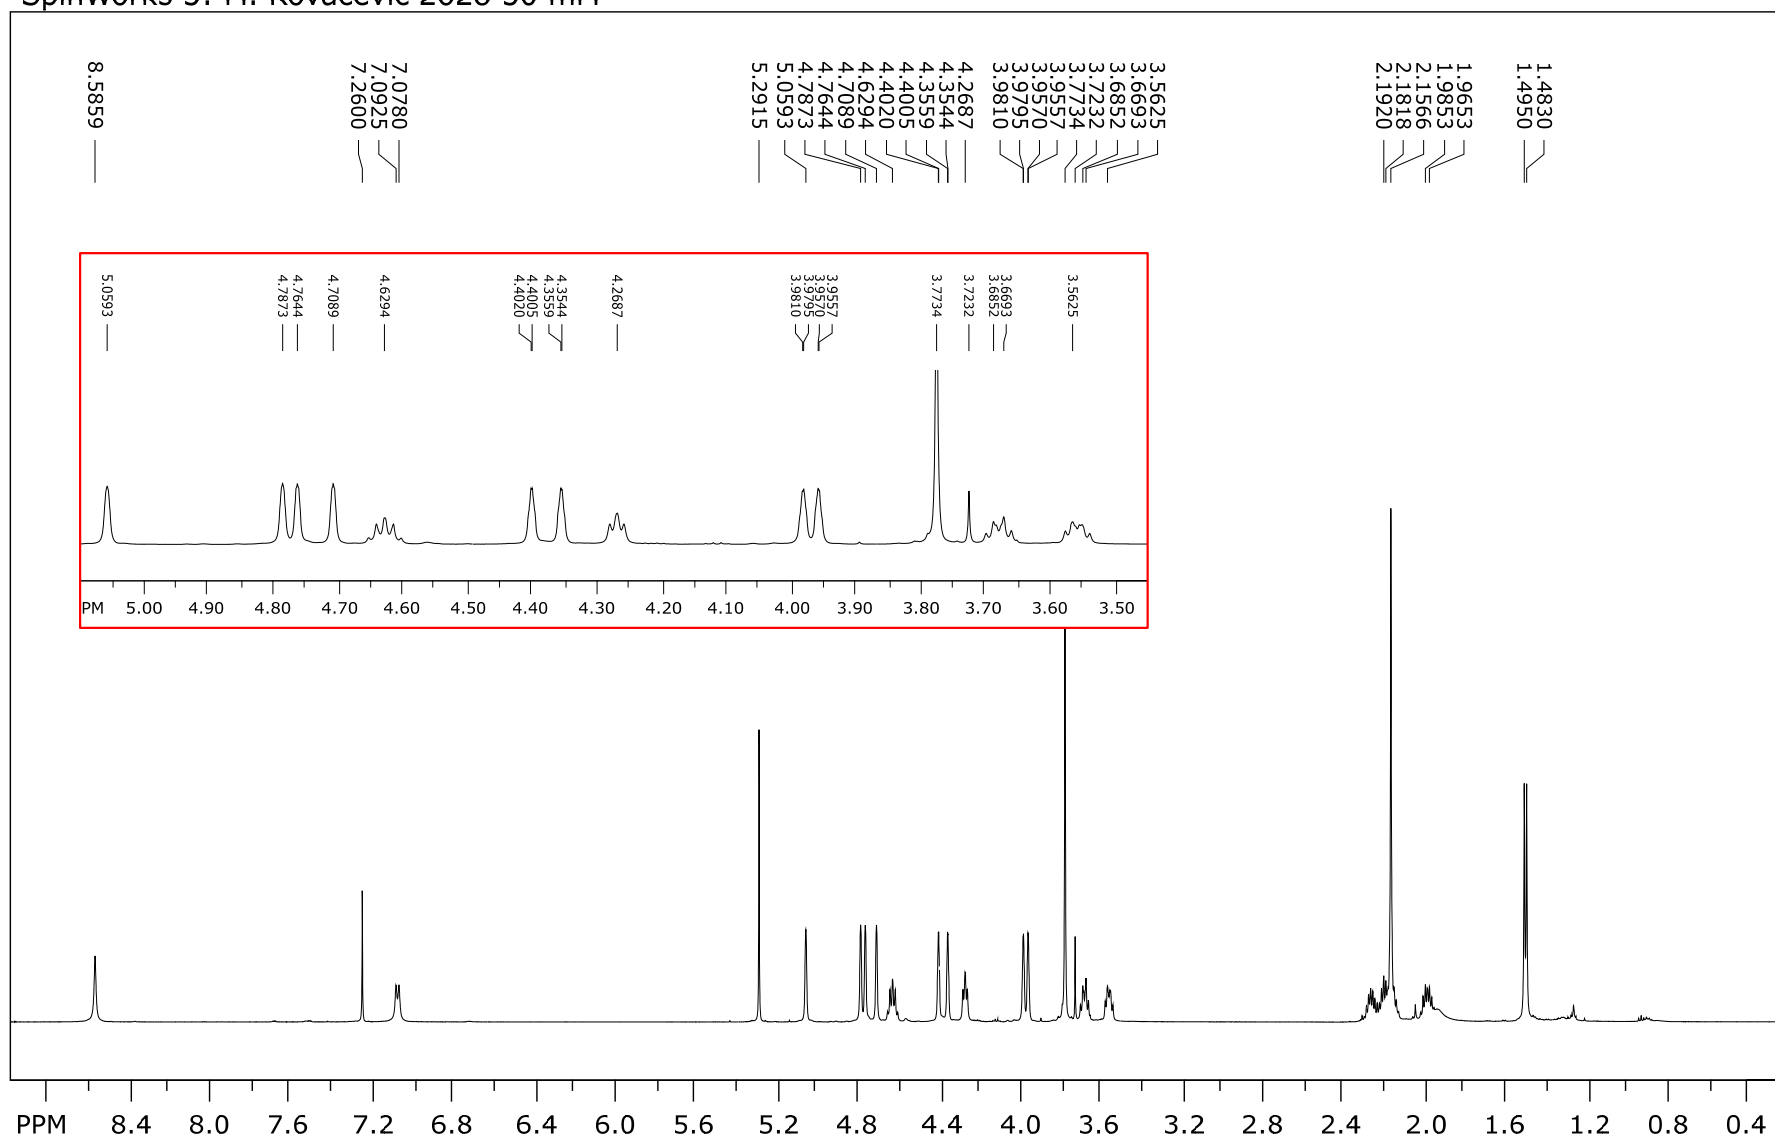

Figure S16.  $^1\text{H}$  NMR spectrum of compound 3 ( $c = 5 \times 10^{-2}$  M).

SpinWorks 3: M. Kovacevic 2628 50 mM

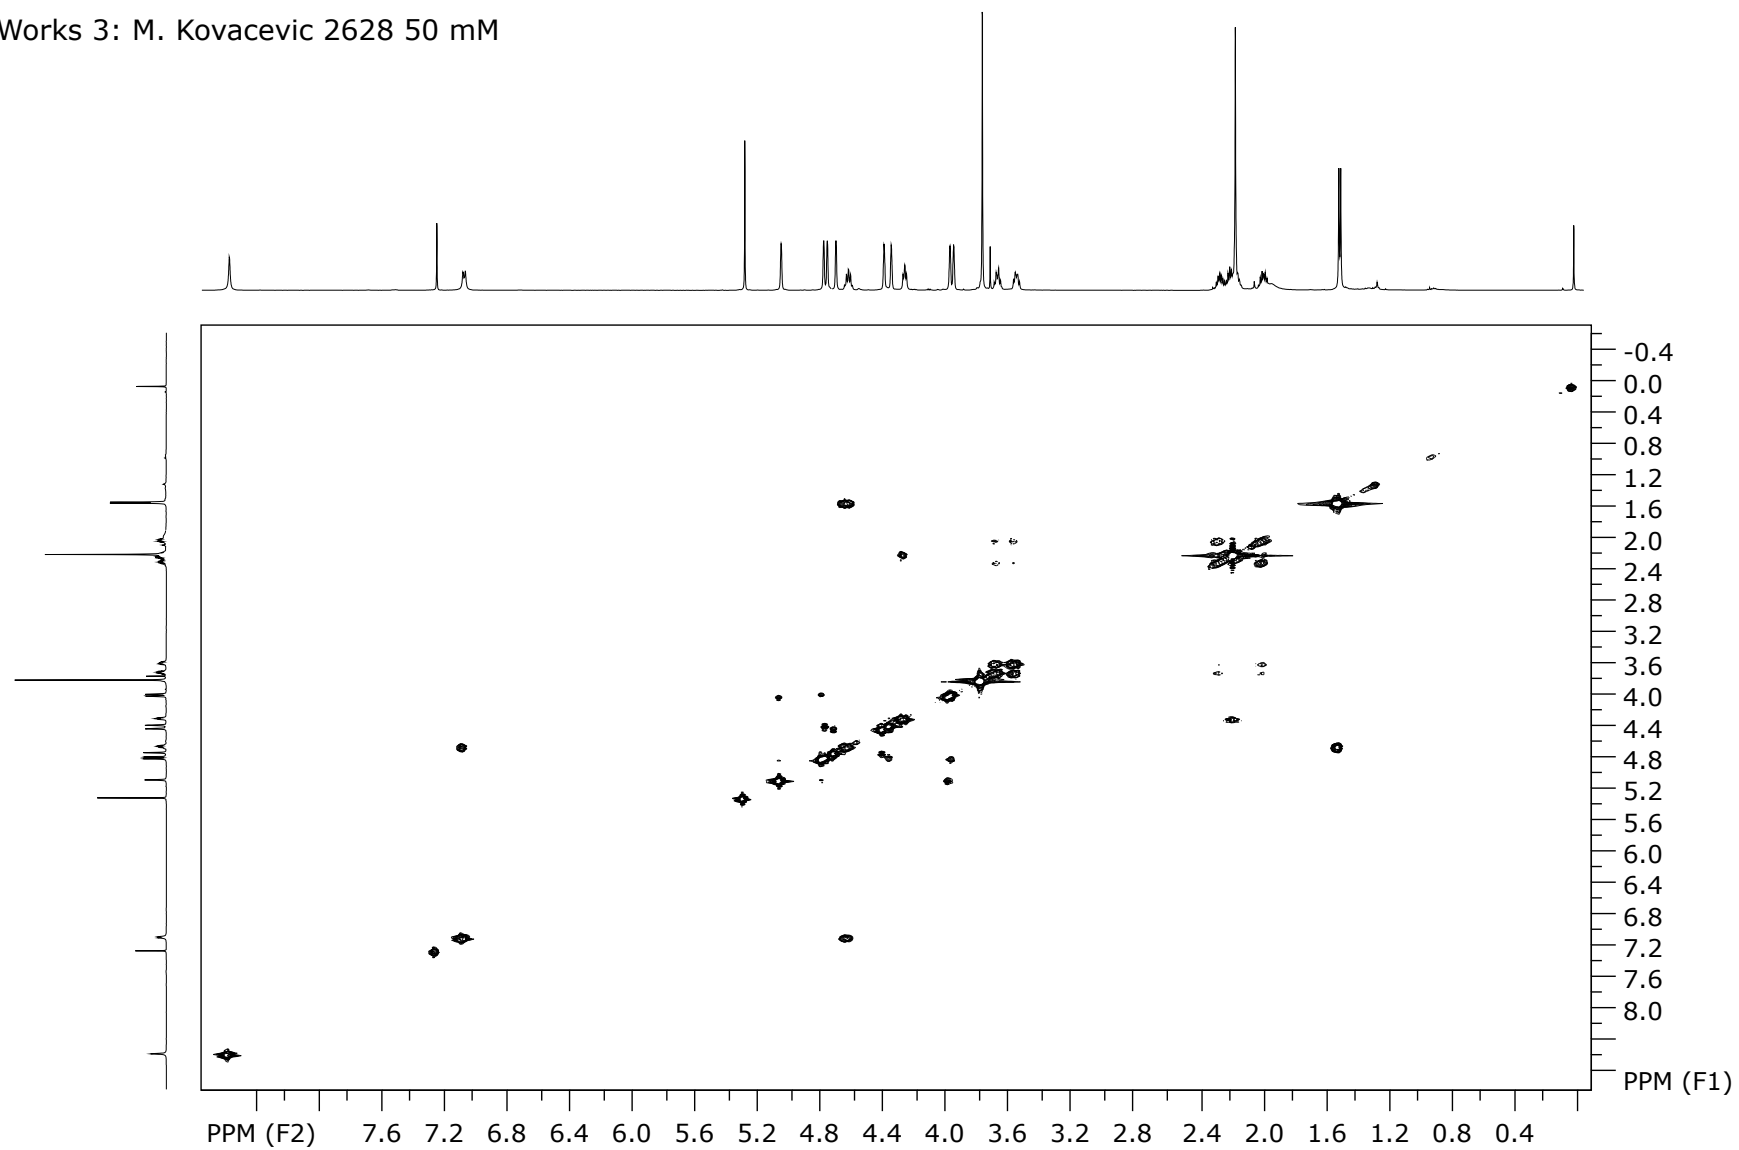

*Figure S17.*  $^1\text{H}$ - $^1\text{H}$  COSY NMR spectrum of compound **3** ( $c = 5 \times 10^{-2}$  M).

SpinWorks 3: M. Kovacevic 2628 50 mM

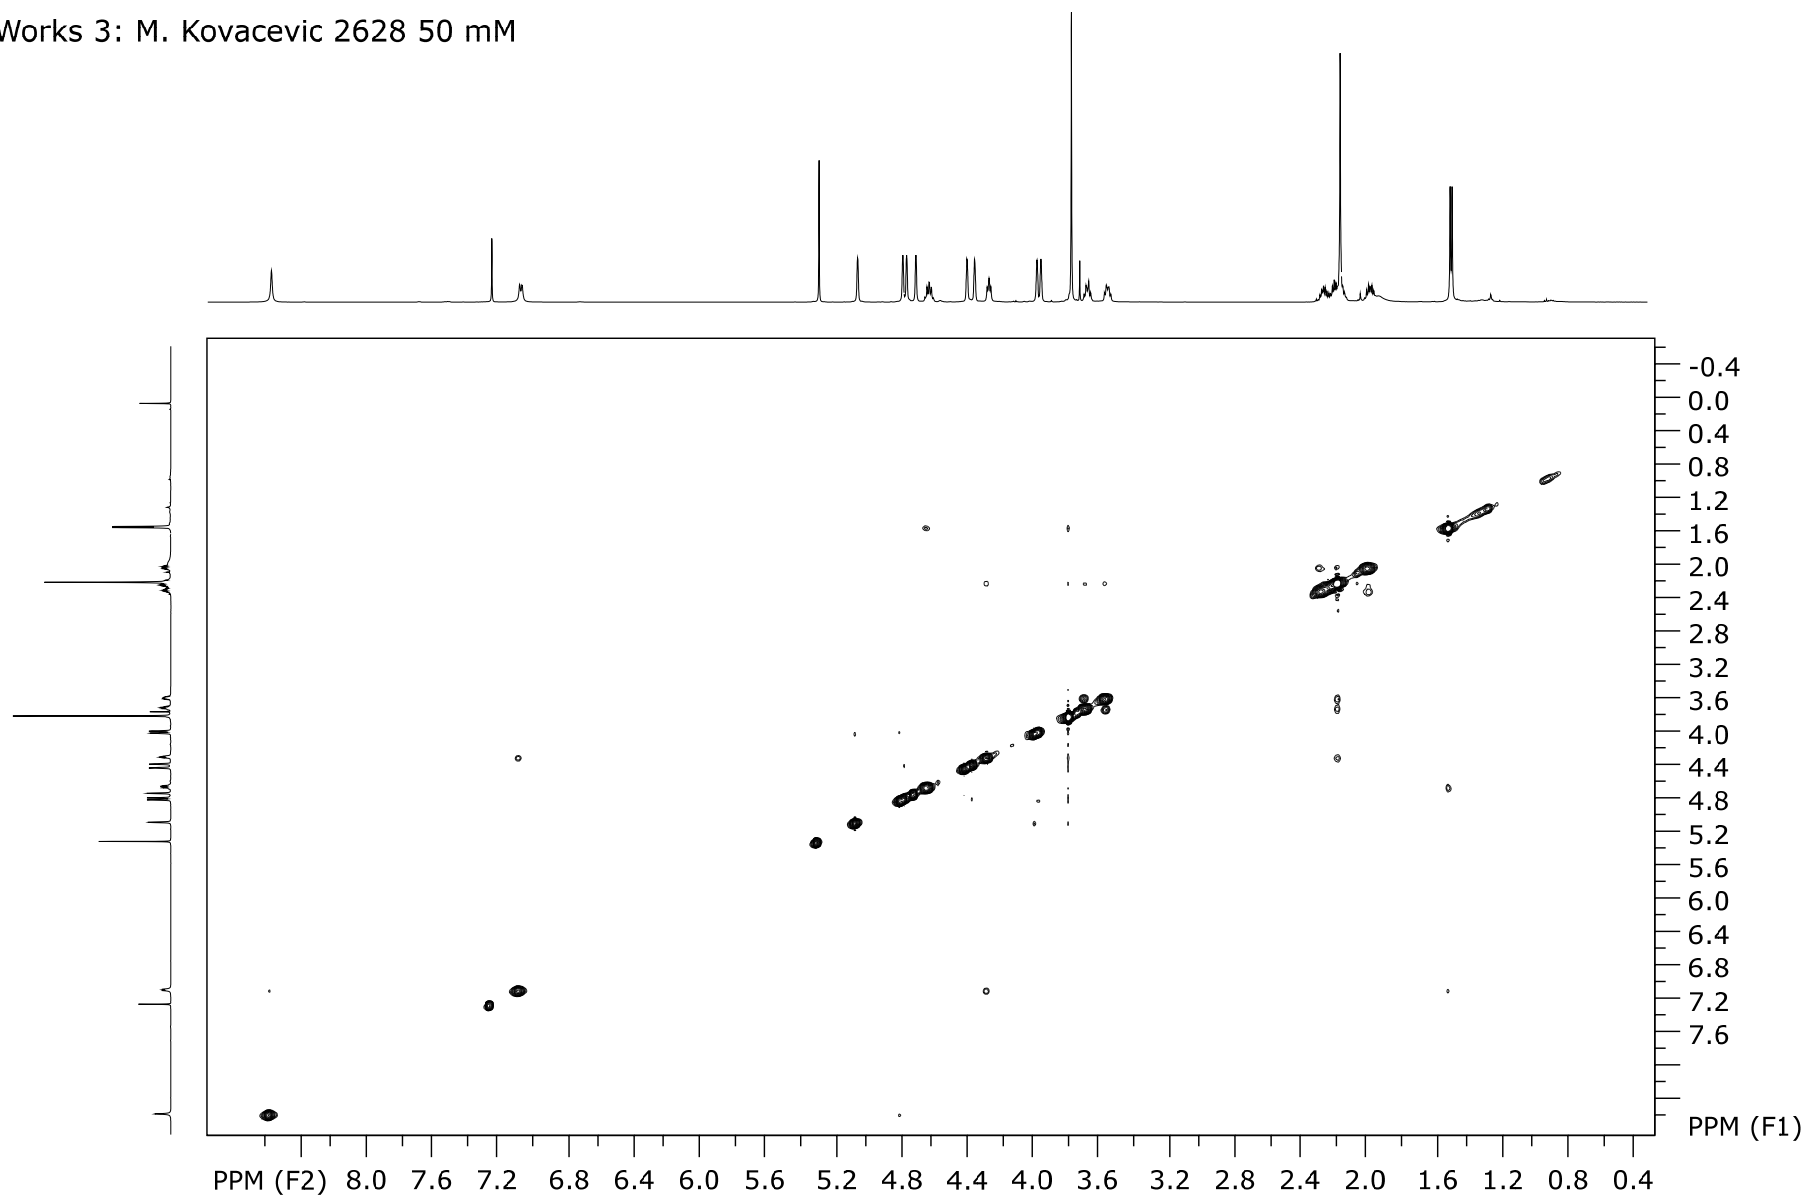

**Figure S18.**  $^1\text{H}$ - $^1\text{H}$  NOESY NMR spectrum of compound **3** ( $c = 5 \times 10^{-2}$  M).

SpinWorks 3: M. Kovacevic 2628 50 mM

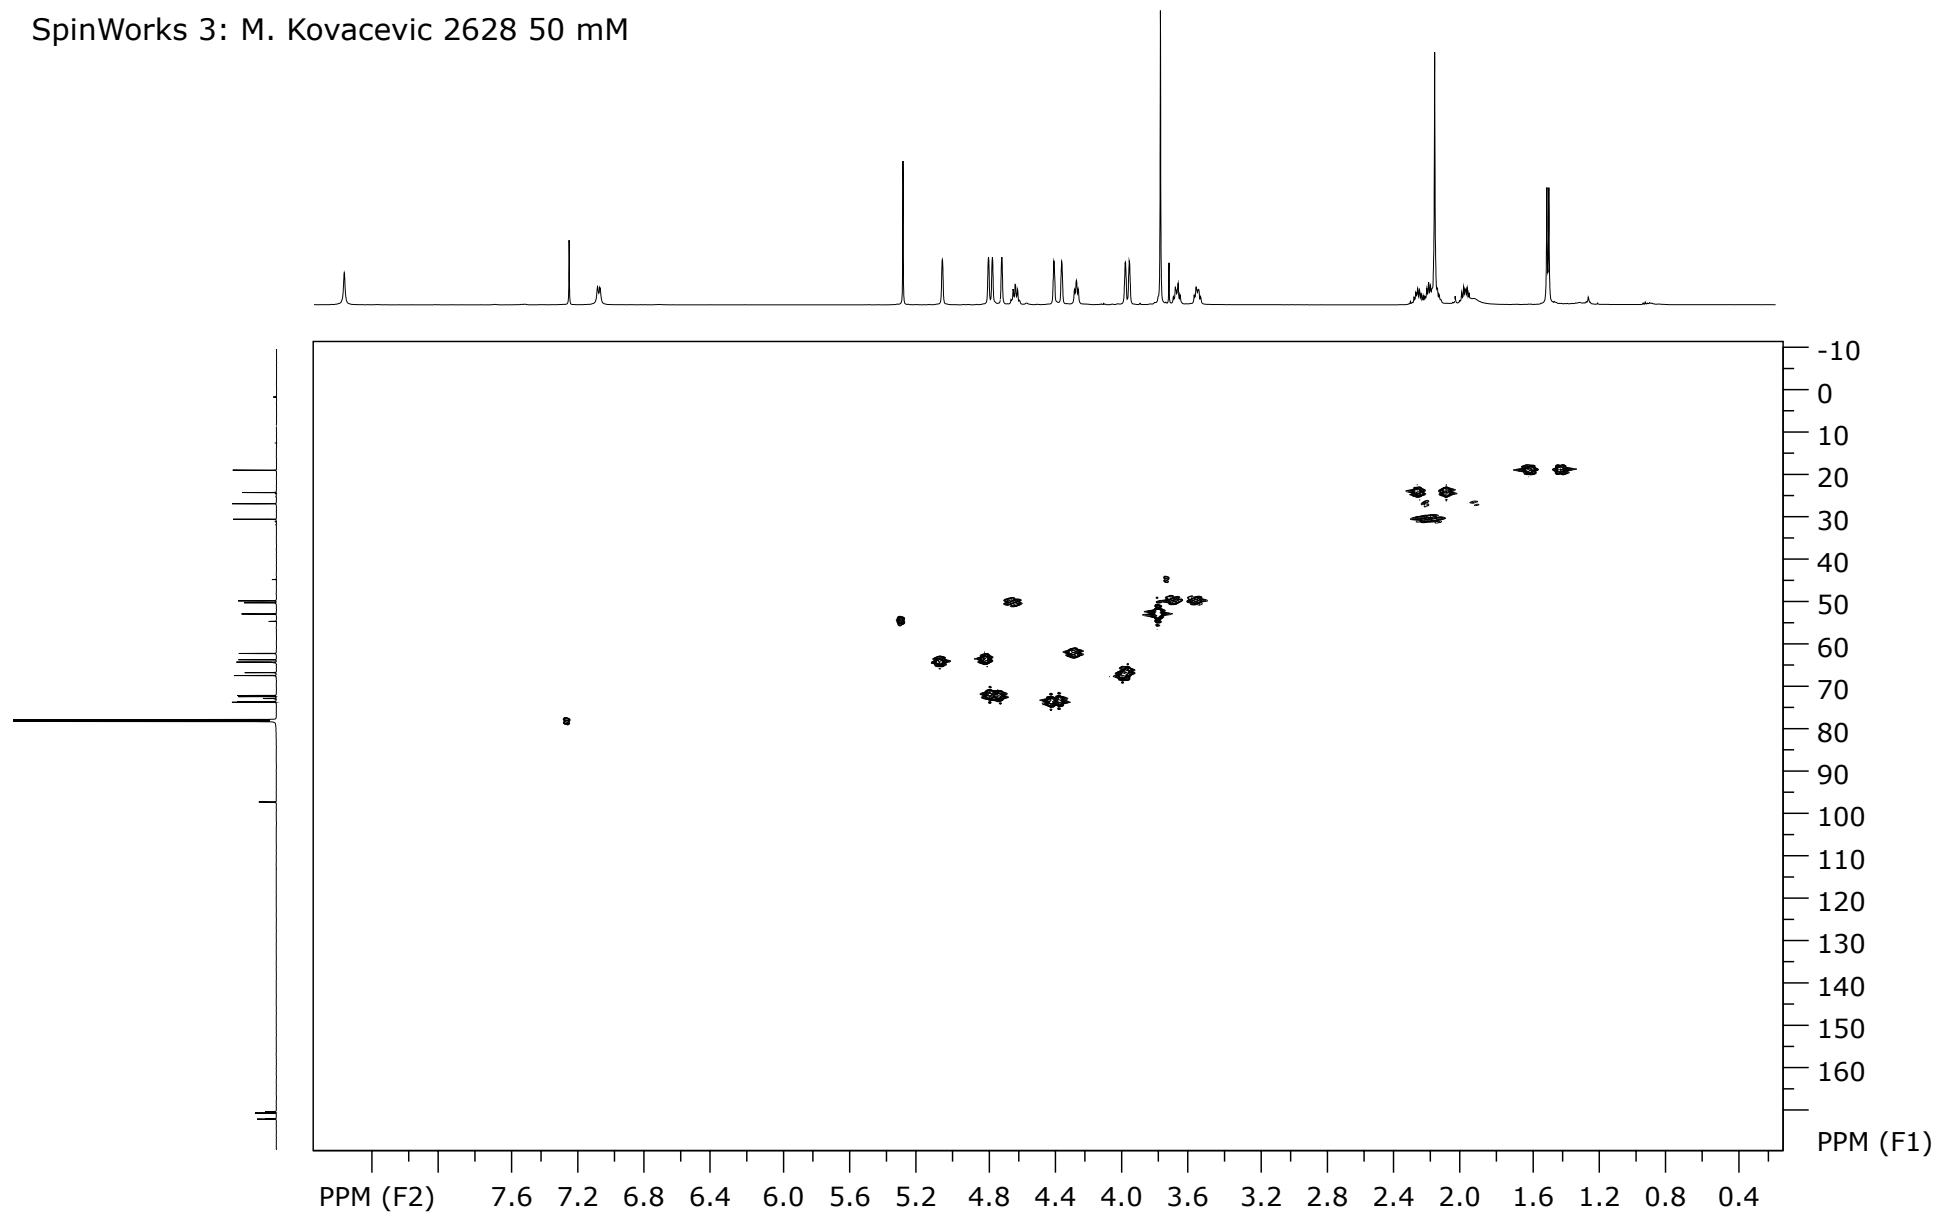

*Figure S19.*  $^1\text{H}$ - $^{13}\text{C}$  HMQC spectrum of compound **3** ( $c = 5 \times 10^{-2}$  M).

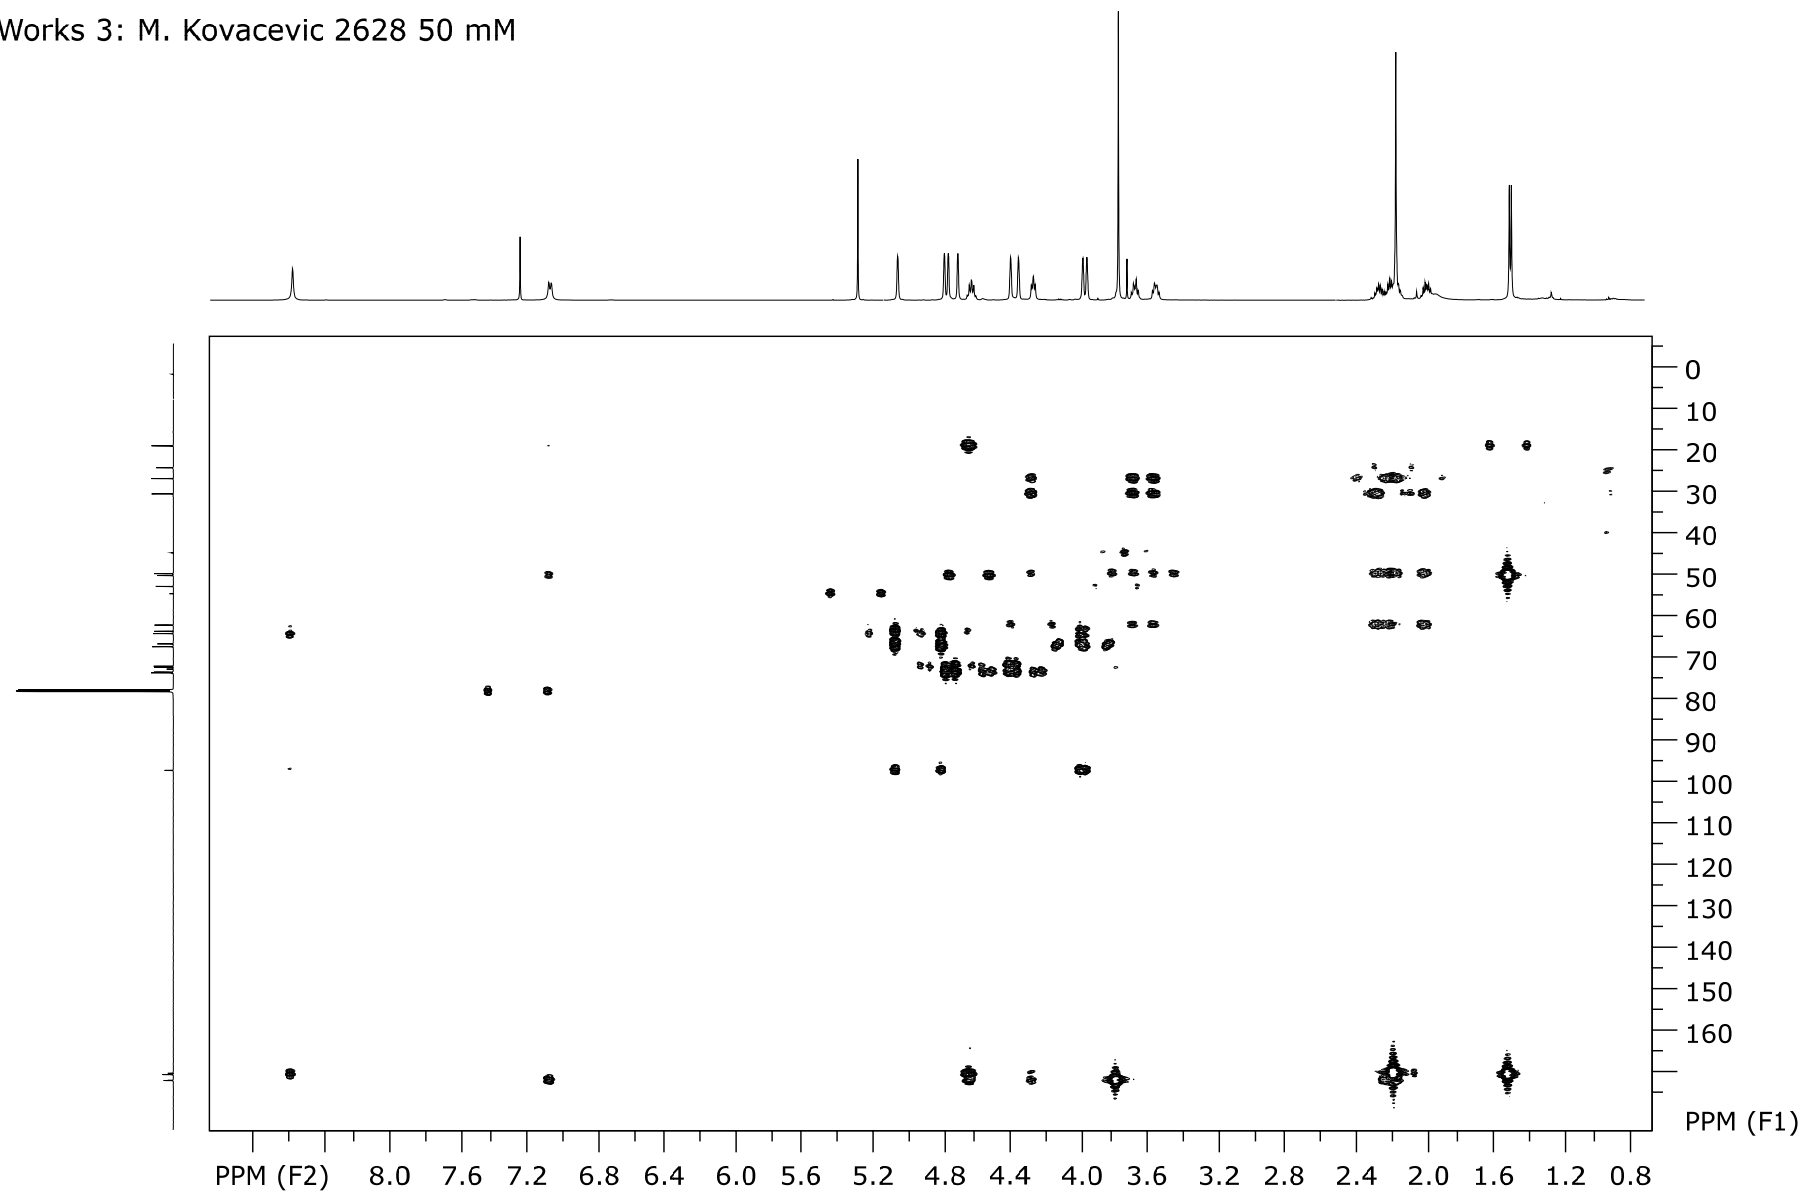

*Figure S20.*  $^1\text{H}$ - $^{13}\text{C}$  HMBC spectrum of compound 3 ( $c = 5 \times 10^{-2}$  M).

SpinWorks 3: M. Kovacevic 2628 50 mM

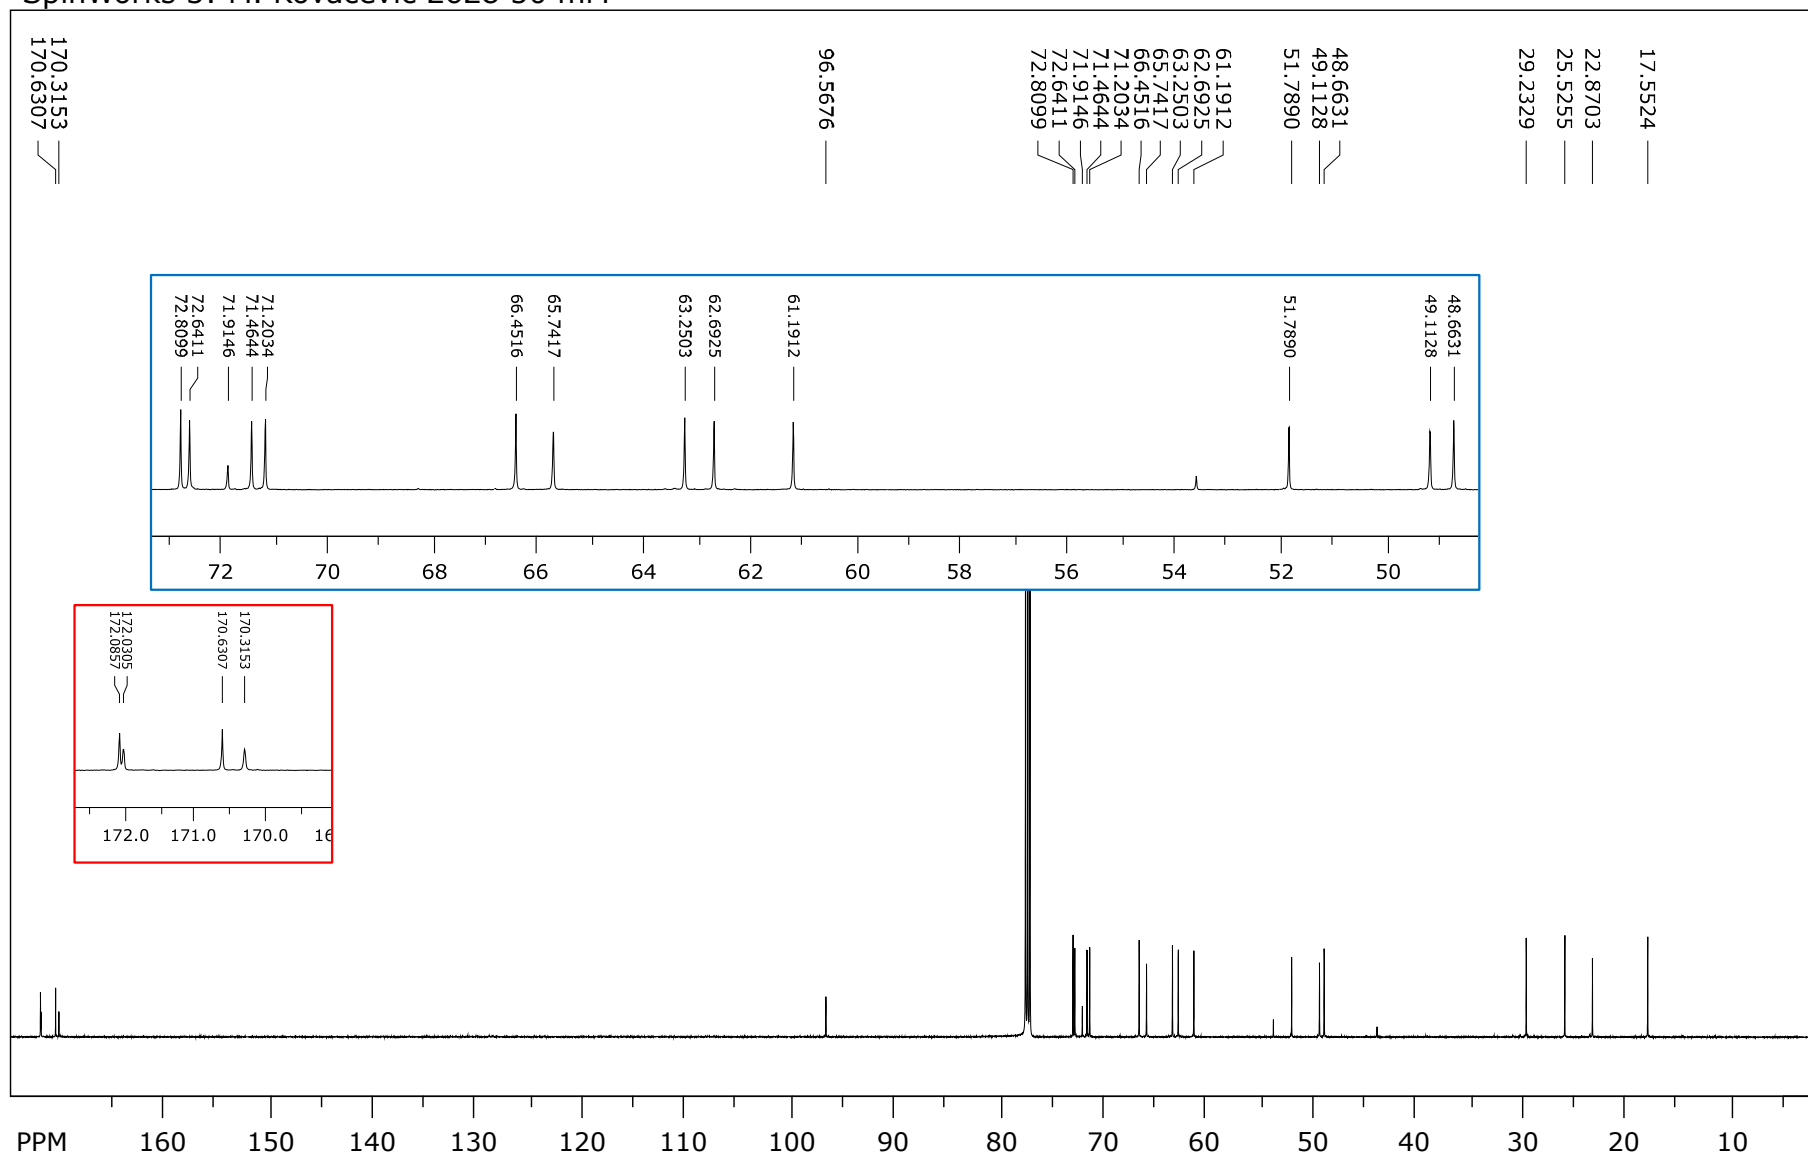

Figure S21.  $^{13}\text{C}\{^1\text{H}\}$  NMR spectrum of compound **3** ( $c = 5 \times 10^{-2}$  M).



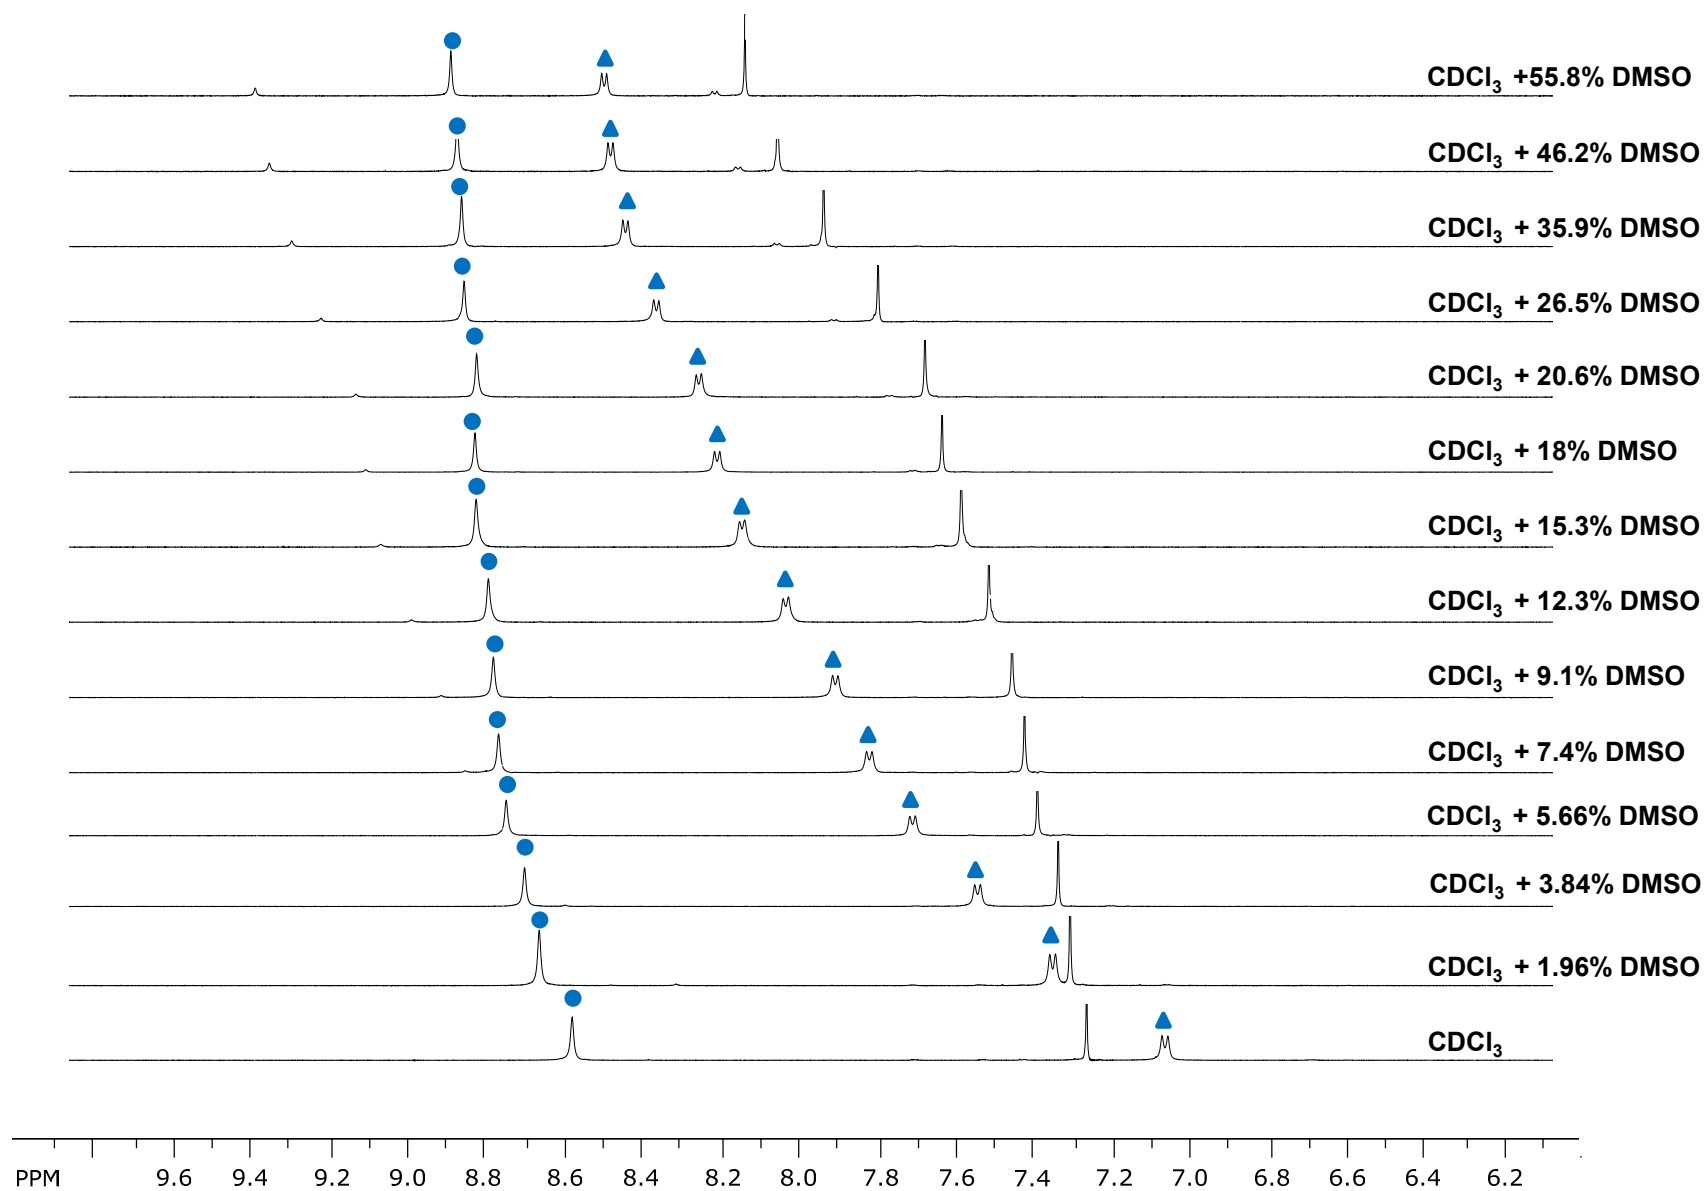

**Figure S22.** Solvent dependence of NH chemical shifts of compound 3 at varying concentrations of DMSO in  $\text{CDCl}_3$  ( $c = 2.5 \times 10^{-2}$  M).

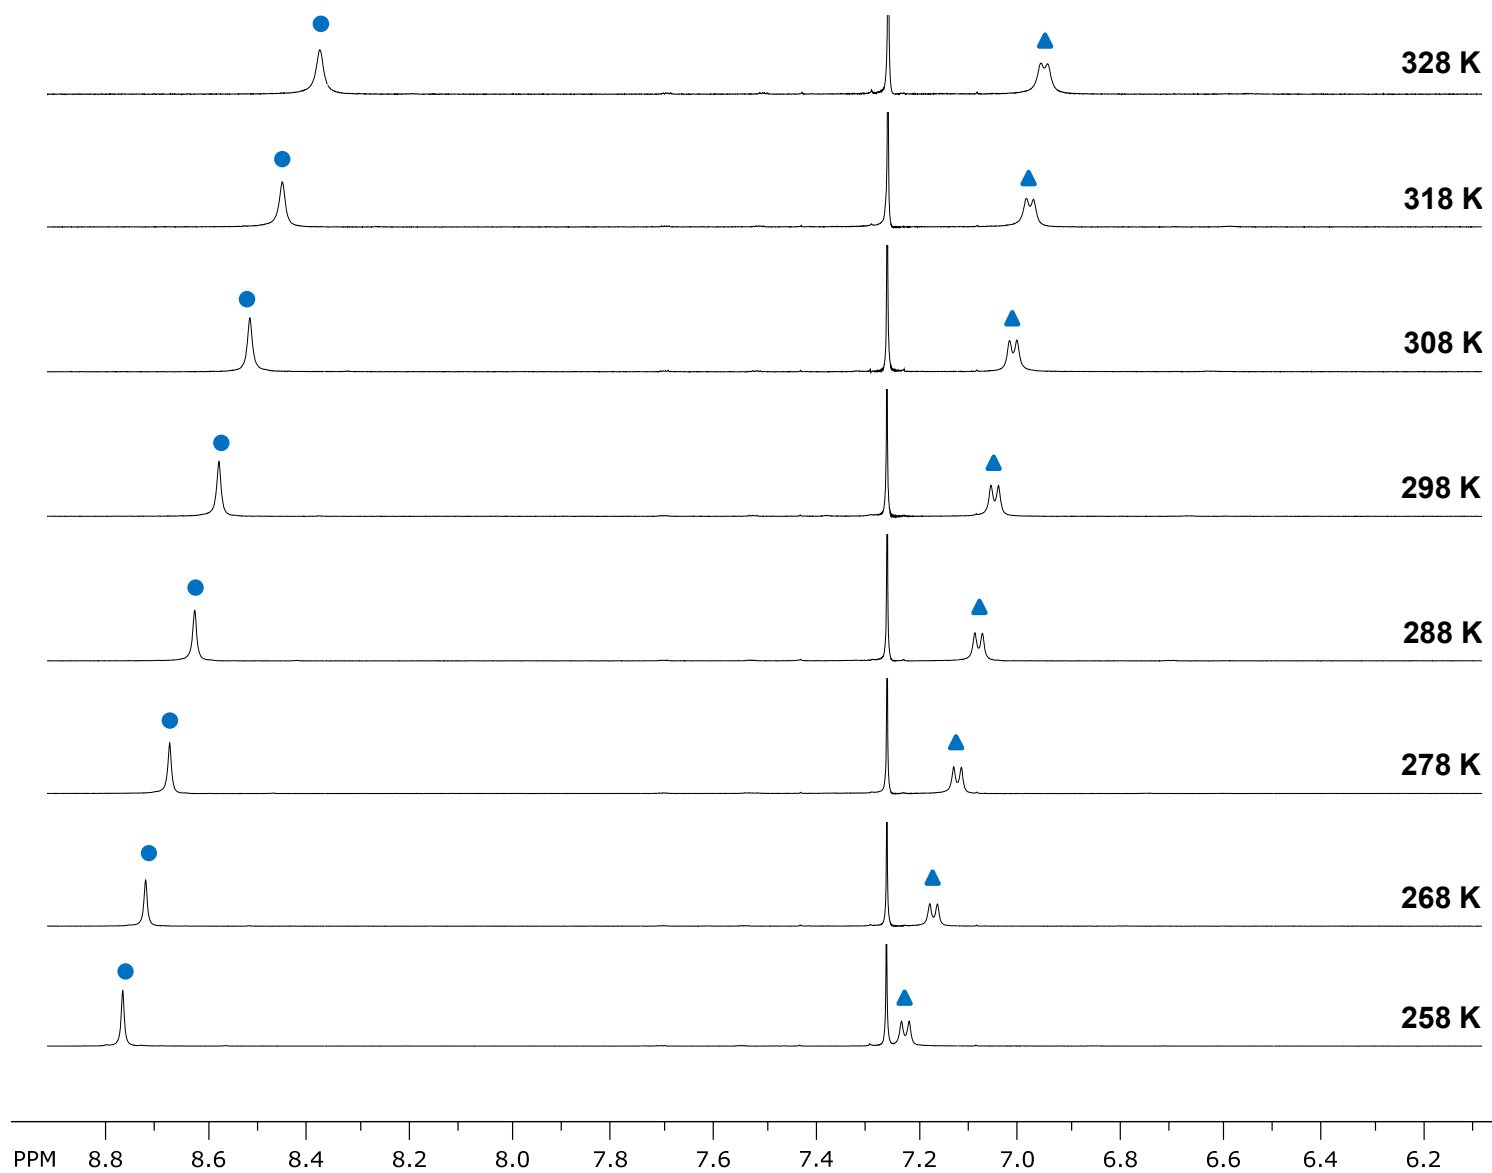

**Figure S23.** Temperature-dependent NH chemical shifts of compound **3** ( $c = 1 \times 10^{-2}$  M).

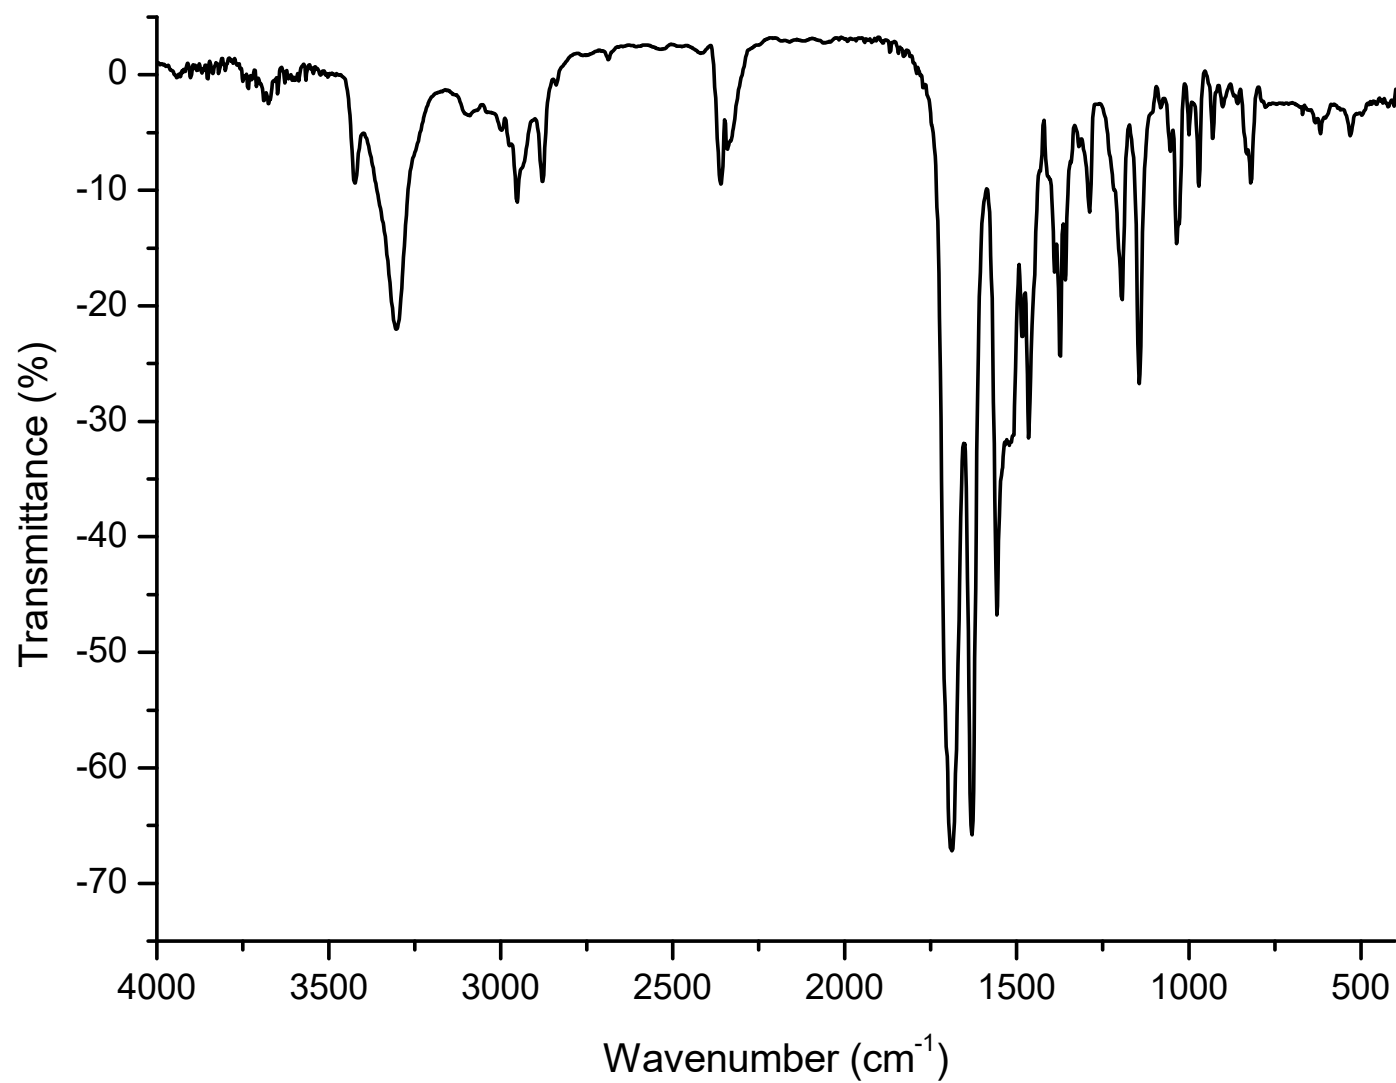

*Figure S24.* IR spectrum of compound **3** ( $c = 5 \times 10^{-2}$  M) in DCM.

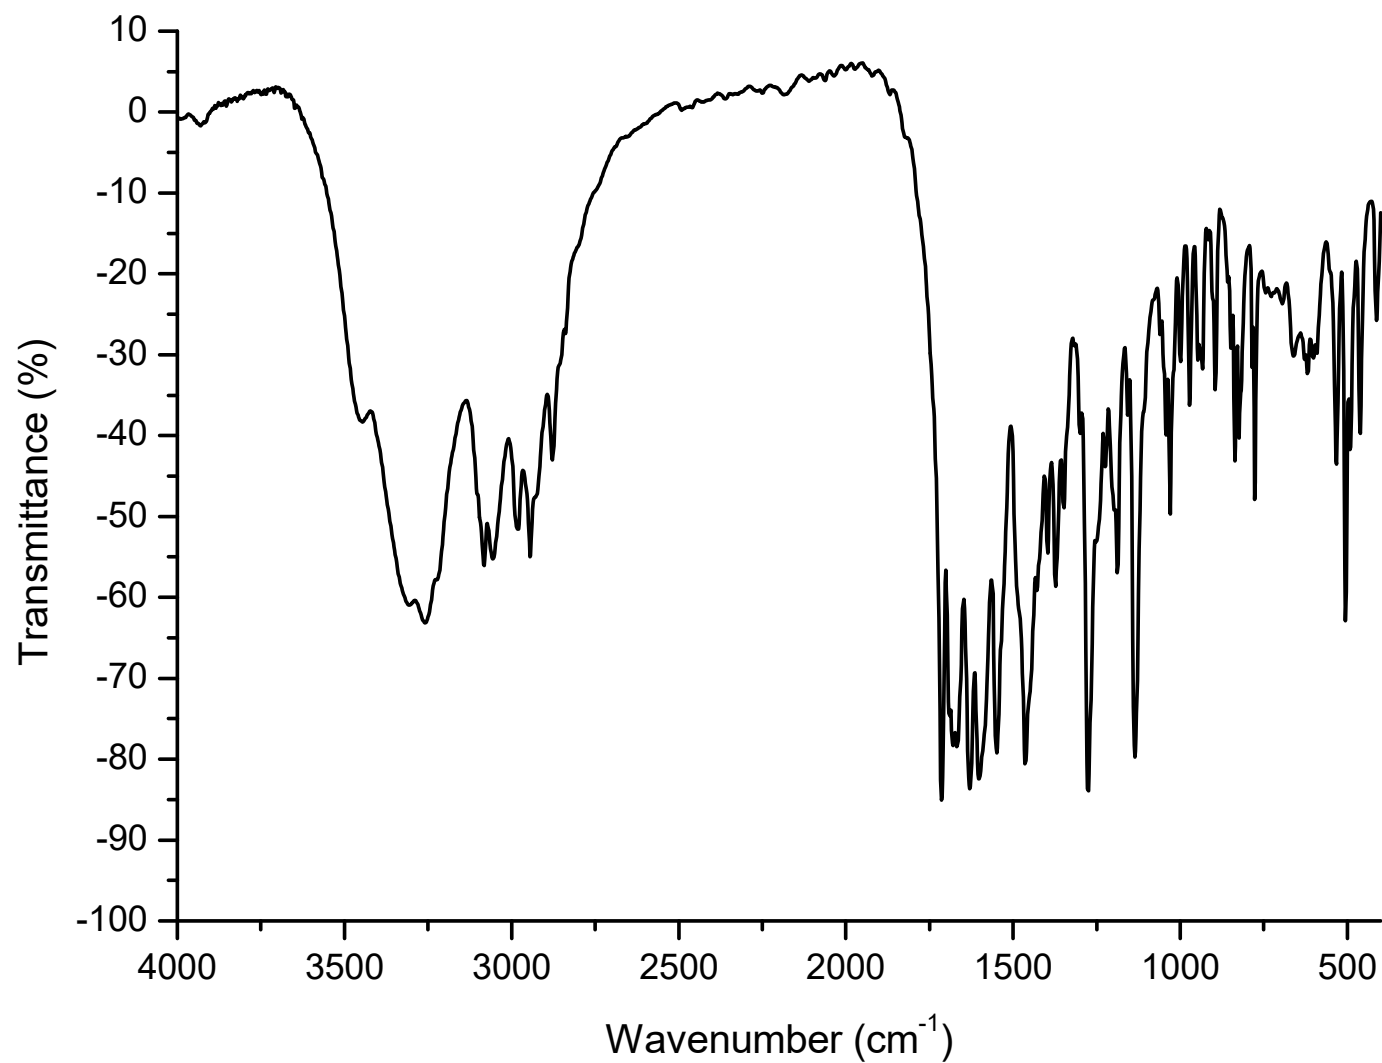

*Figure S25.* IR spectrum of compound **3** (2 mg) in KBr (200 mg).

**Boc-L-Pro-L-Ala-NH-Fn-COOMe (4)**

| Ion type | Calc. mass | Measured mass | Mass error / ppm | Mol. Formula                                                     | Int. CAL    |
|----------|------------|---------------|------------------|------------------------------------------------------------------|-------------|
| M+       | 527.1719   | 527.1729      | 1.9              | C <sub>25</sub> H <sub>33</sub> N <sub>3</sub> O <sub>6</sub> Fe | azitromicin |

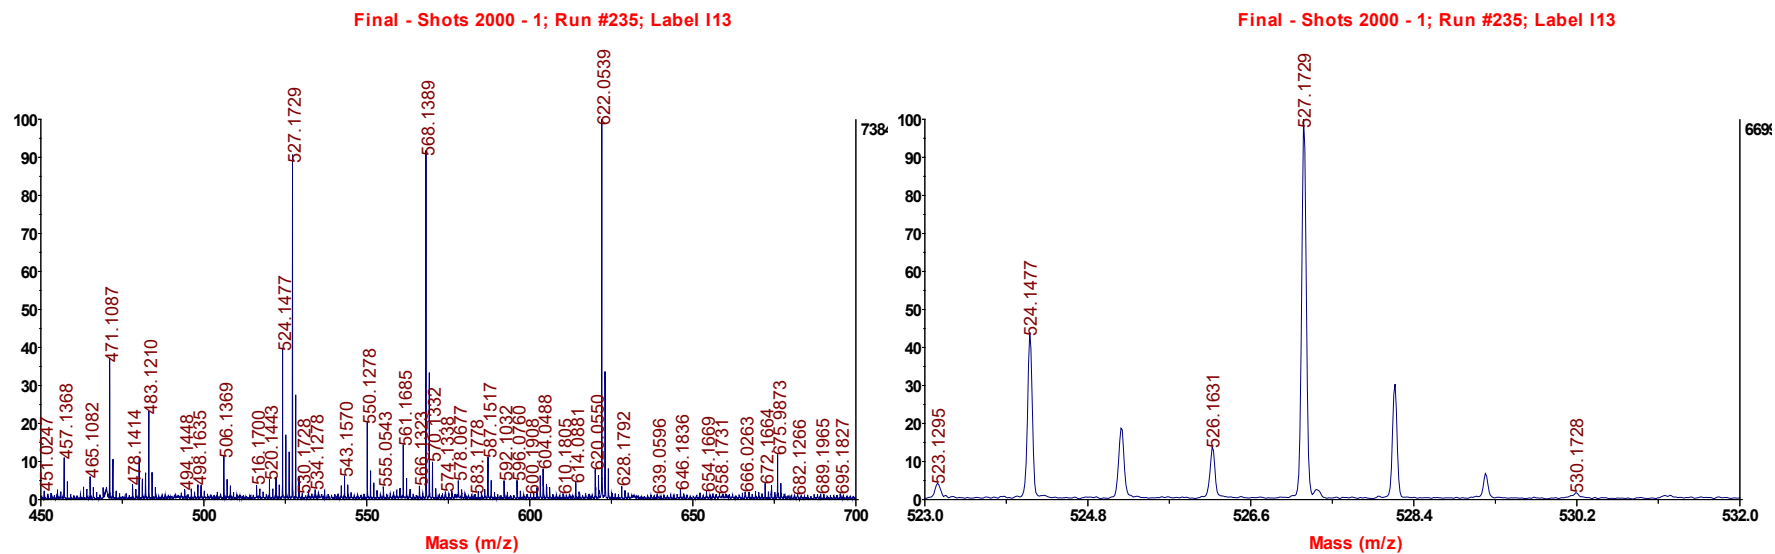

*Figure S26.* HRMS spectrum of compound 4.

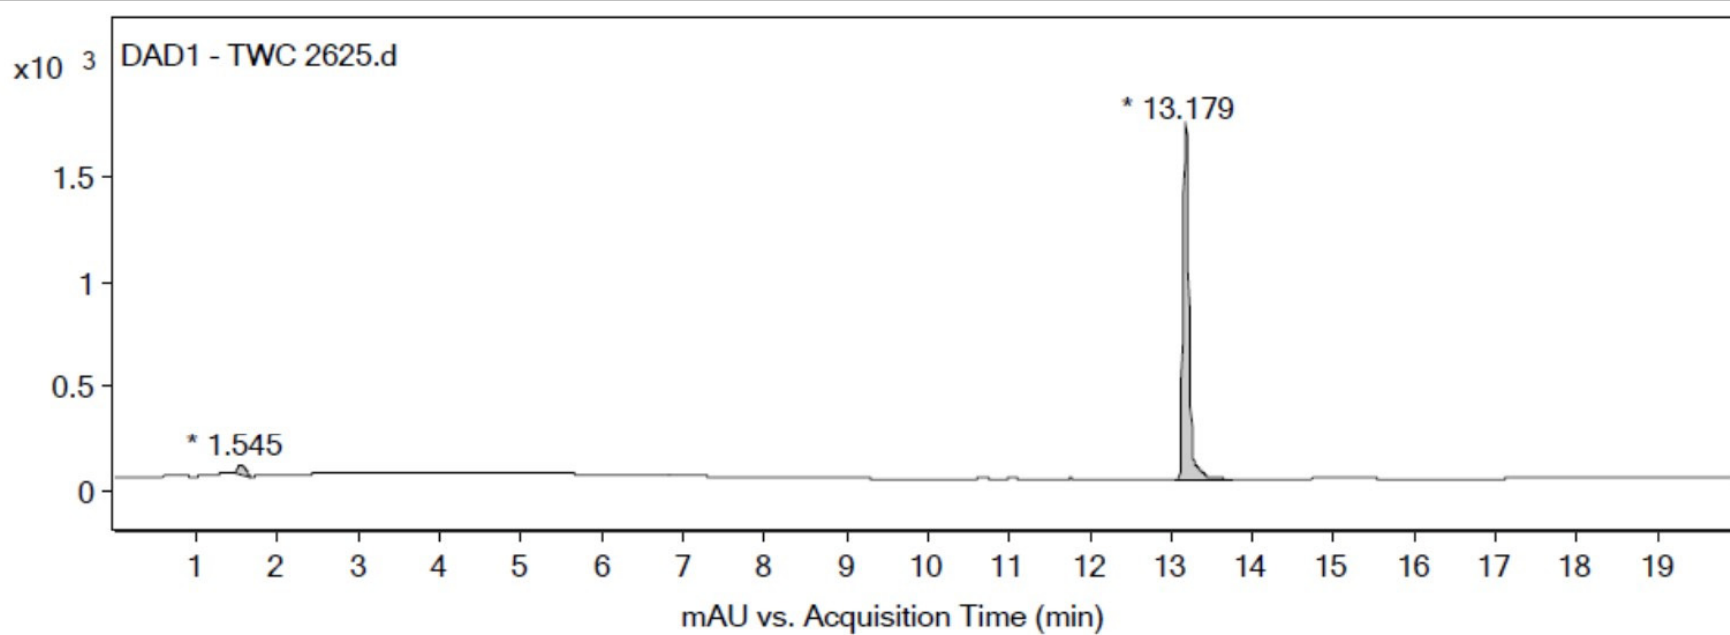

#### Integration Peak List

| Peak | Start  | RT     | End    | Height  | Area    | Area % |
|------|--------|--------|--------|---------|---------|--------|
| 1    | 1.452  | 1.545  | 1.679  | 49.37   | 370.02  | 4.04   |
| 2    | 13.065 | 13.179 | 13.765 | 1702.41 | 9150.92 | 100    |

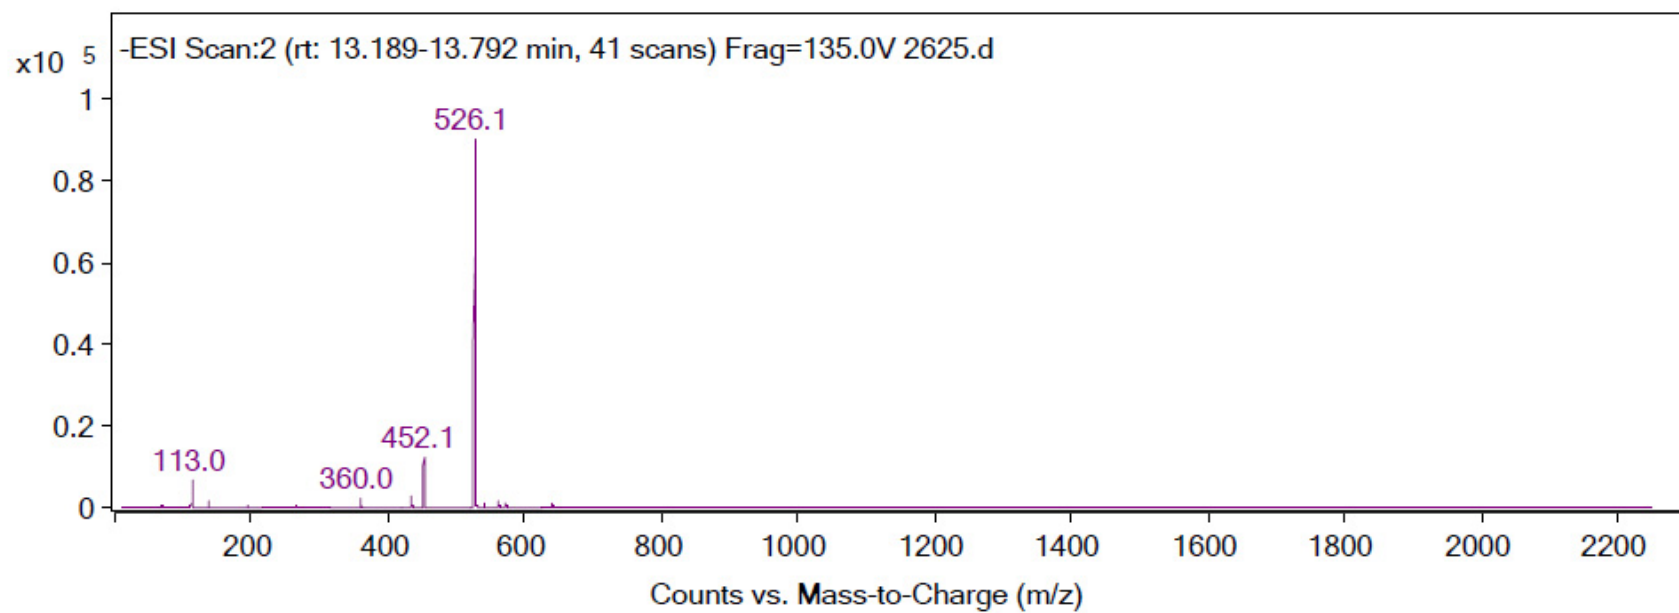

**Peak List**

| m/z   | z | Abund    |
|-------|---|----------|
| 113   |   | 6847.82  |
| 360   |   | 1990.32  |
| 434.1 |   | 2932.19  |
| 452.1 | 1 | 12574.58 |
| 453   | 1 | 3605.96  |
| 524.1 |   | 6158.28  |
| 526.1 | 1 | 90050.9  |
| 527.2 | 1 | 30406.55 |
| 528.1 | 1 | 6029.68  |
| 562   |   | 1833.22  |

*Figure S27.* HPLC-ESI spectra of compound **4**.

SpinWorks 3: M. Kovacevic 2625 50 mM

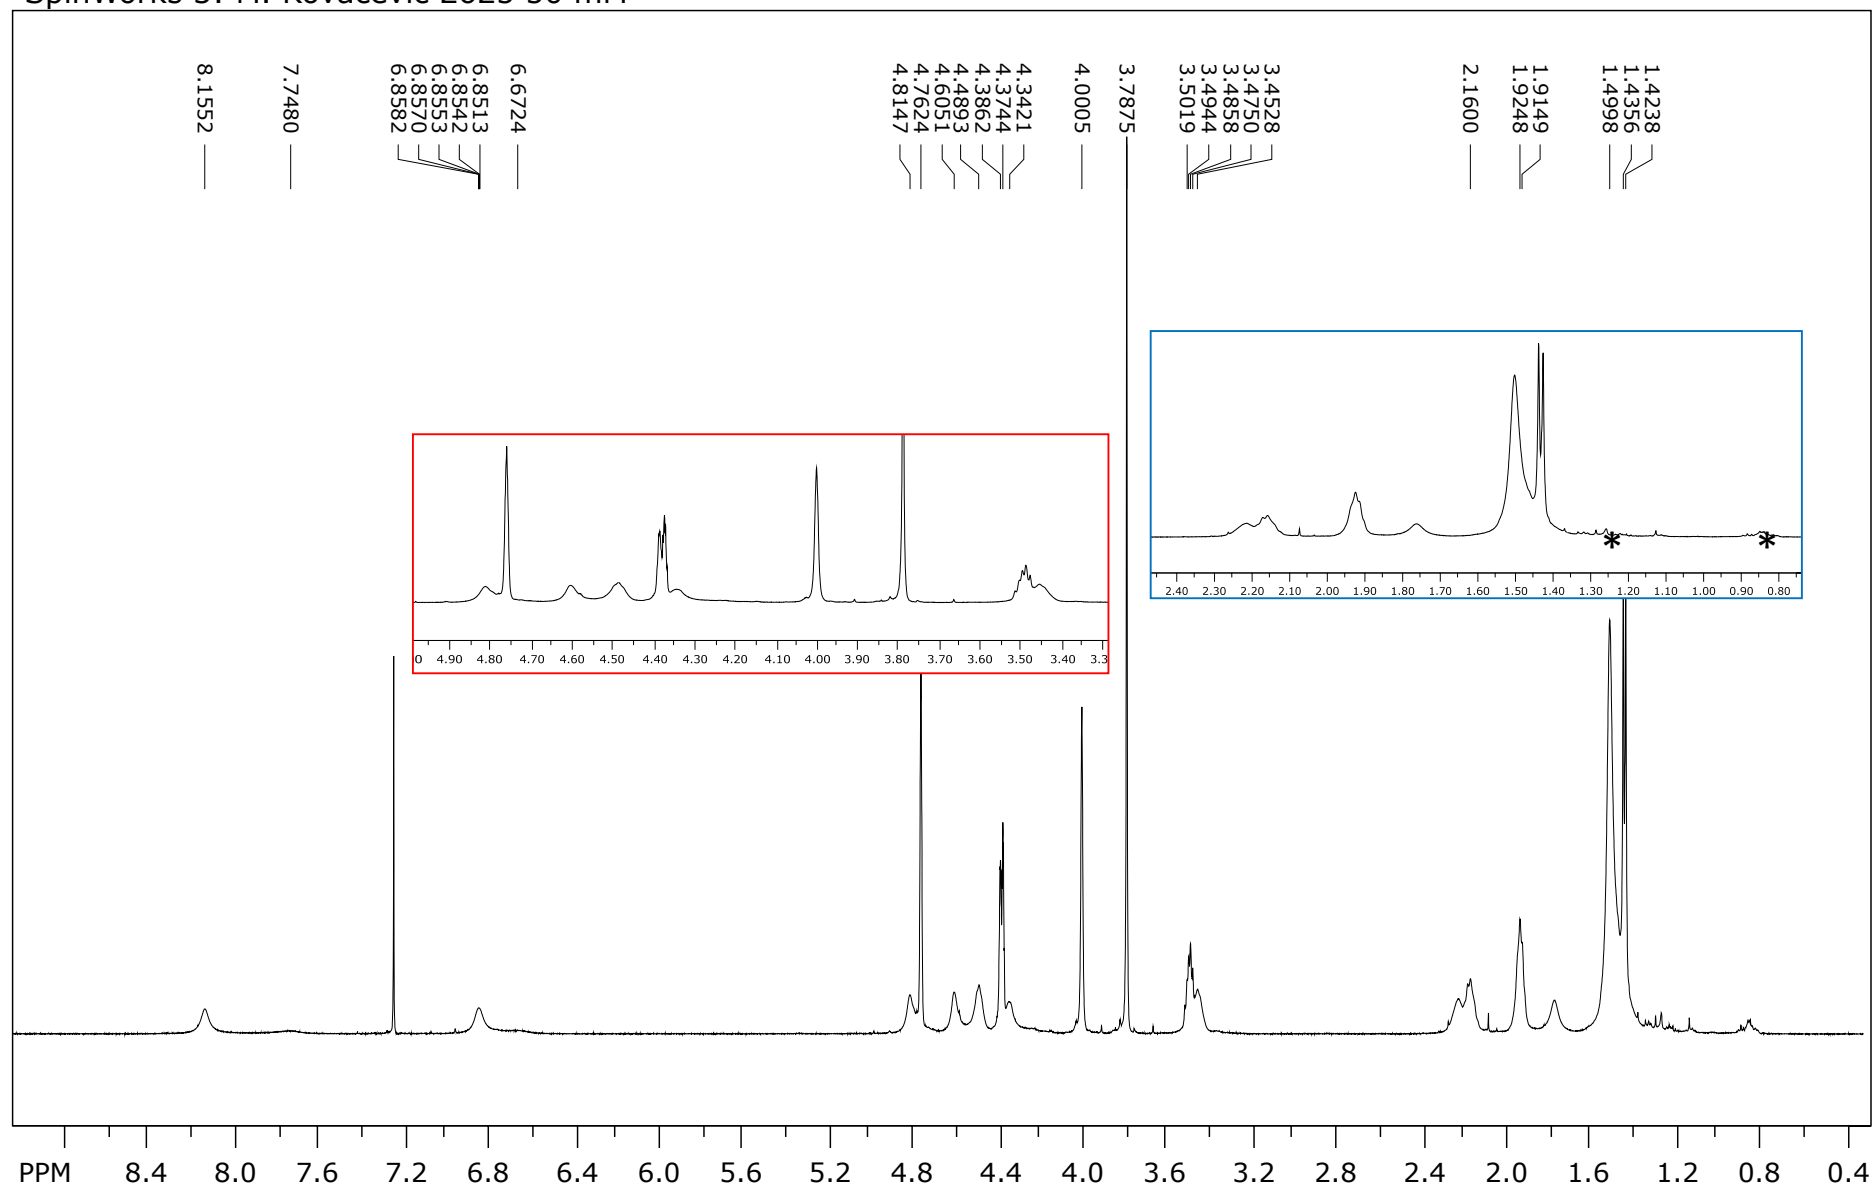

Figure S28. <sup>1</sup>H NMR spectrum of compound 4 ( $c = 5 \times 10^{-2}$  M).



SpinWorks 3: M. Kovacevic 2625 50 mM

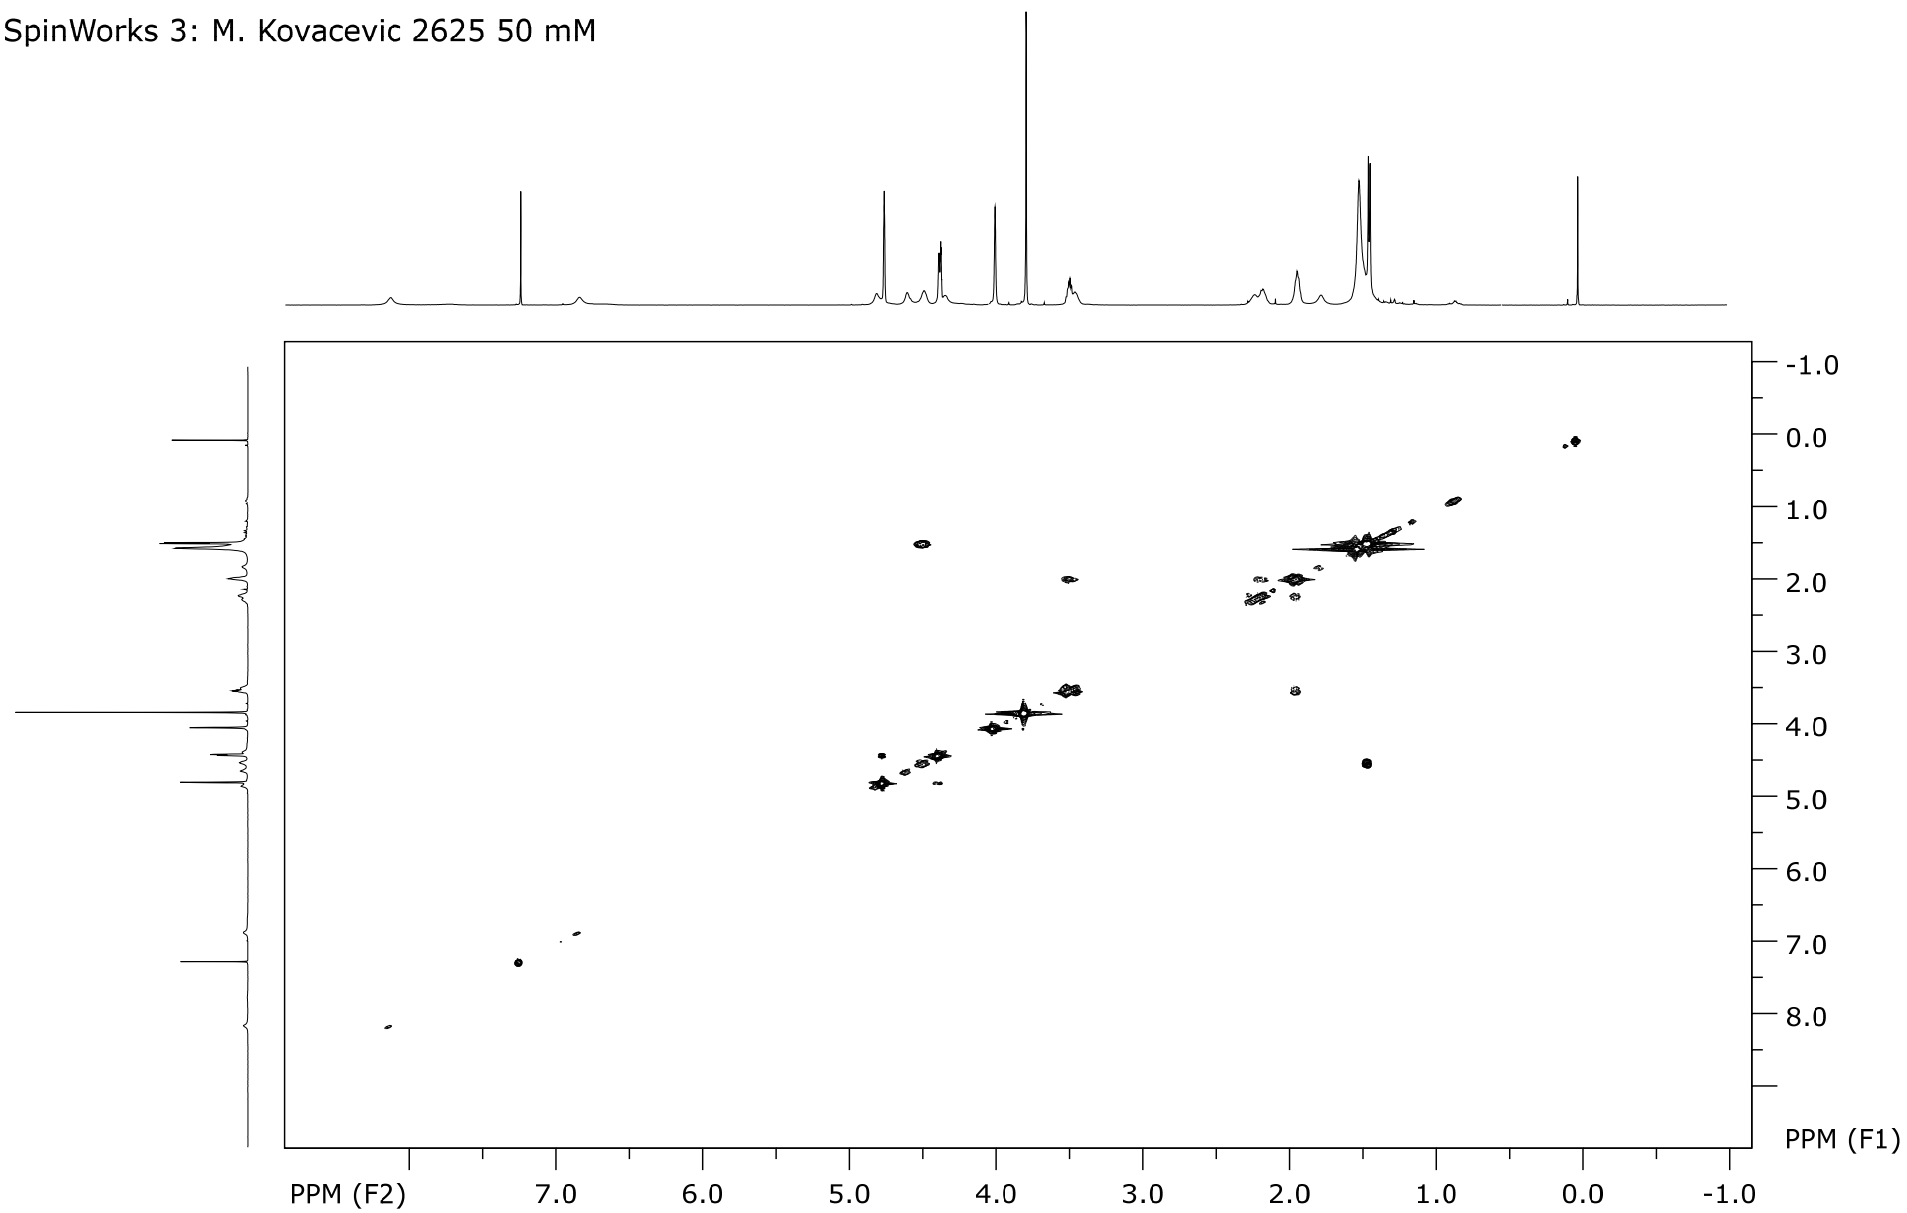

*Figure S29.*  $^1\text{H}$ - $^1\text{H}$  COSY NMR spectrum of compound **4** ( $c = 5 \times 10^{-2}$  M).

SpinWorks 3: M. Kovacevic 2625 50 mM

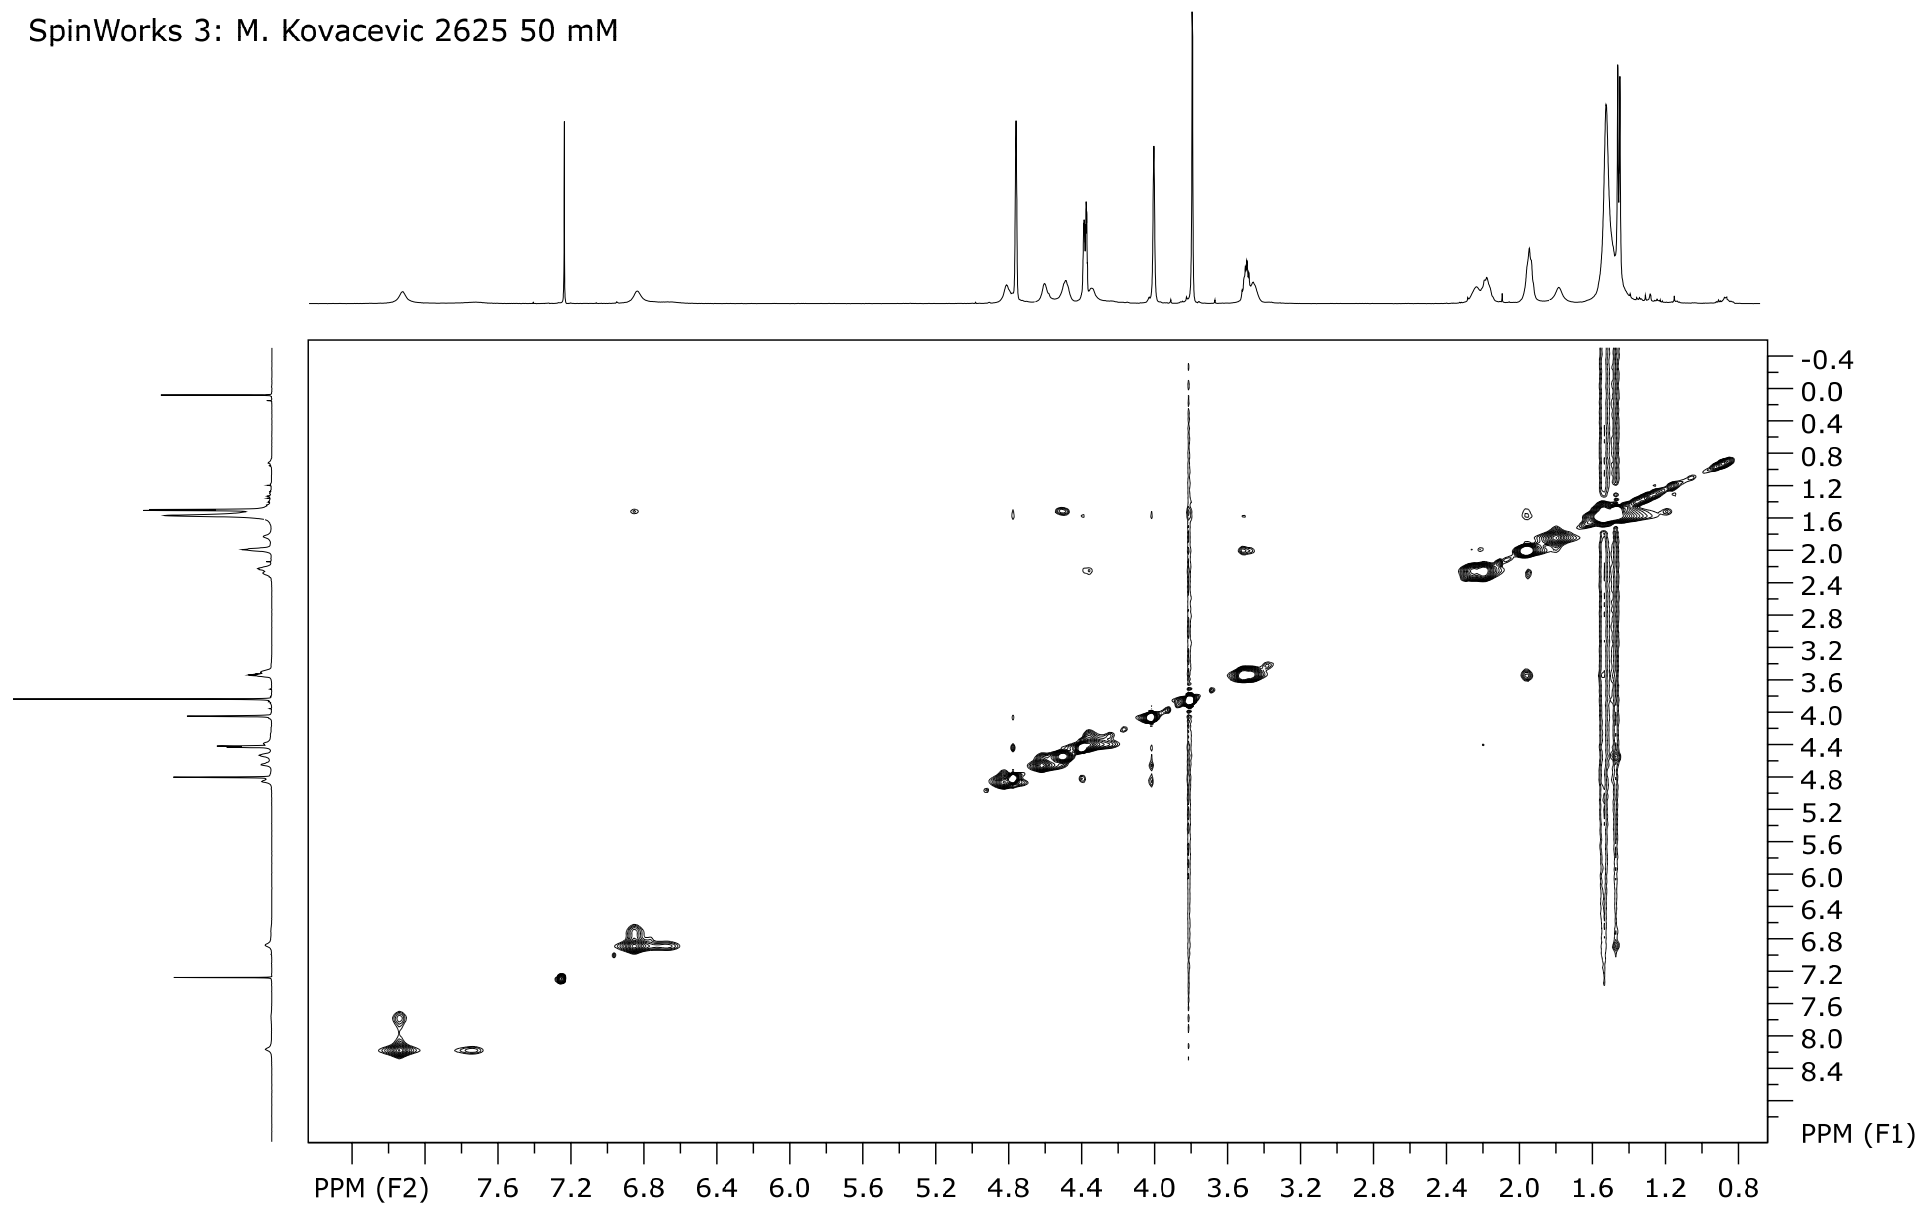

*Figure S30.*  $^1\text{H}$ - $^1\text{H}$  NOESY NMR spectrum of compound **4** ( $c = 5 \times 10^{-2}$  M).

SpinWorks 3: M. Kovacevic 2625 50 mM

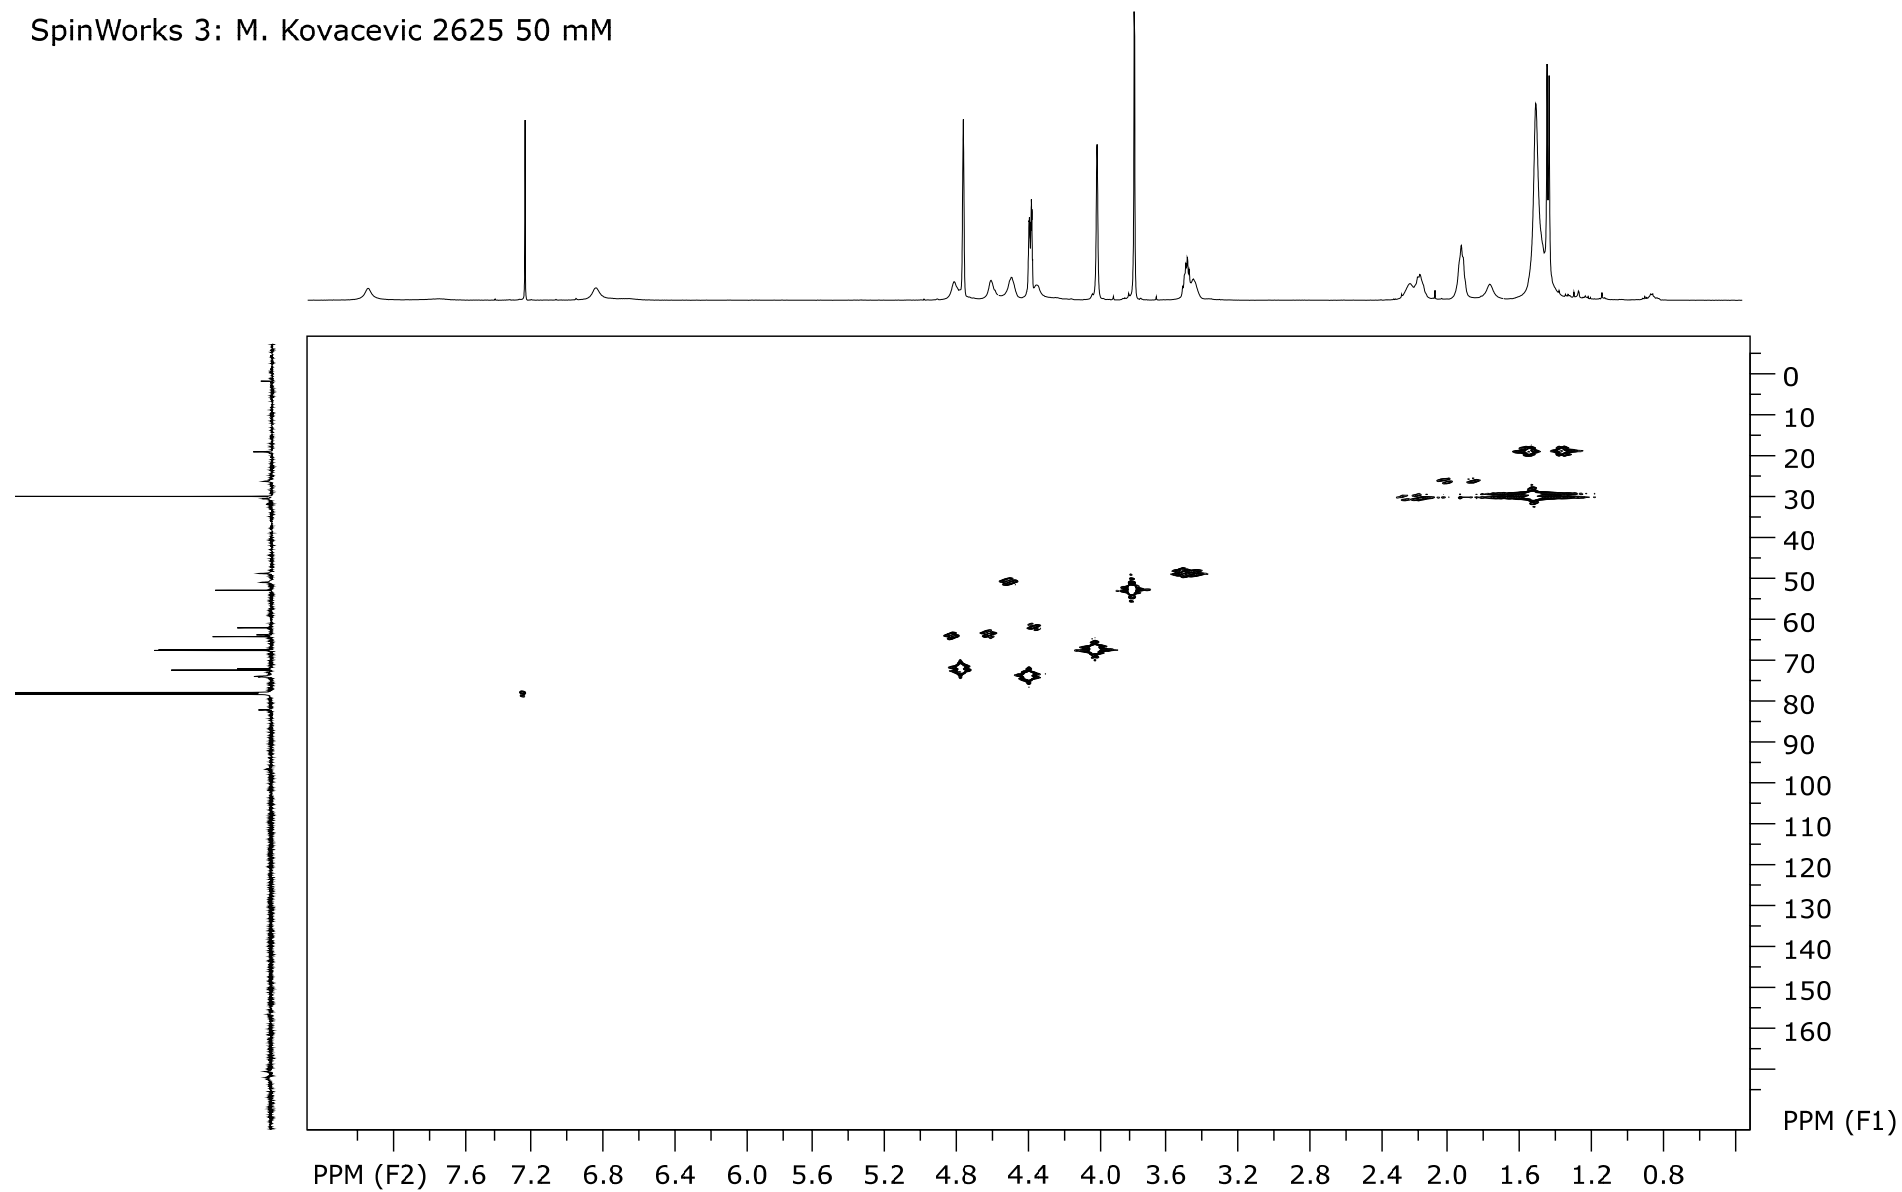

Figure S31.  $^1\text{H}$ - $^{13}\text{C}$  HMQC spectrum of compound 4 ( $c = 5 \times 10^{-2}$  M).

SpinWorks 3: M. Kovacevic 2625 50 mM

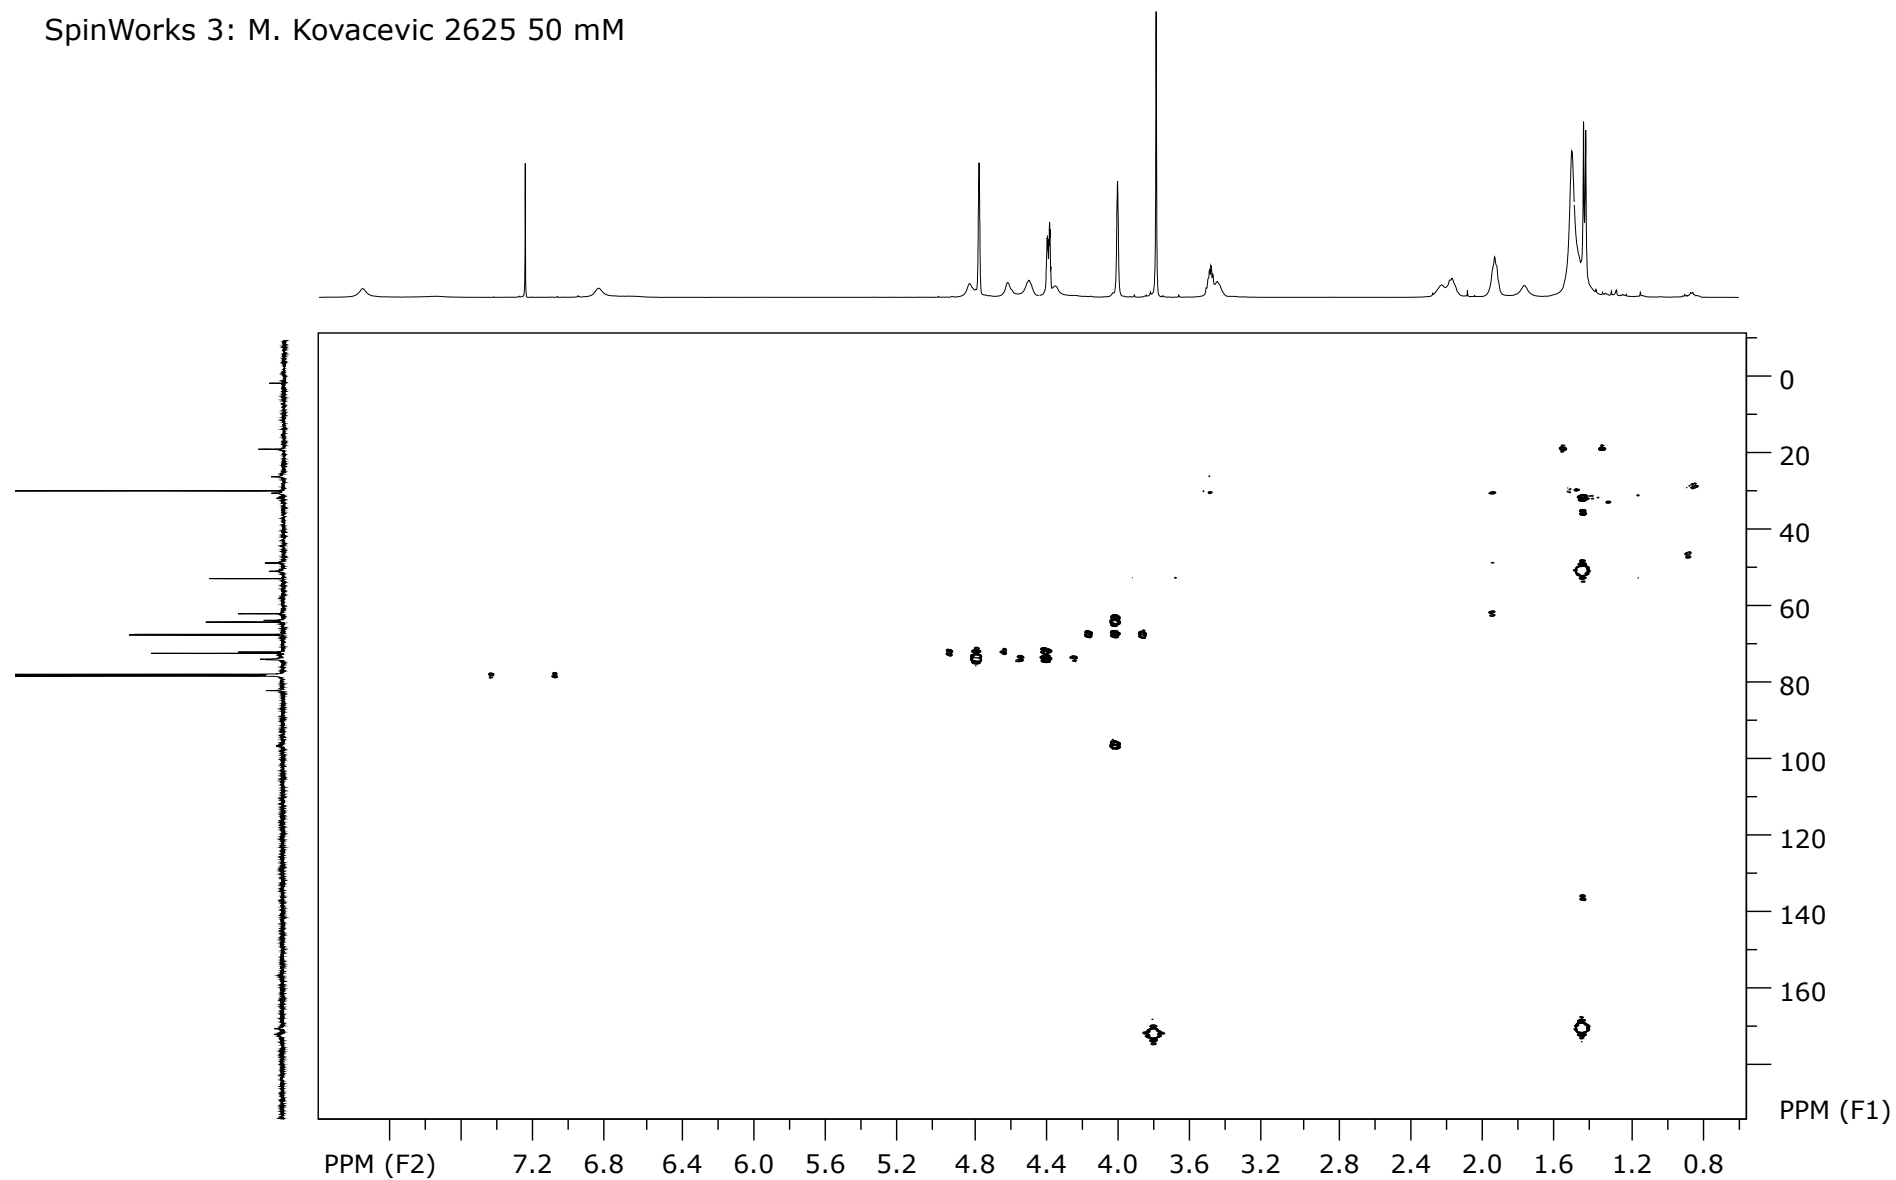

Figure S32.  $^1\text{H}$ - $^{13}\text{C}$  HMBC spectrum of compound 4 ( $c = 5 \times 10^{-2}$  M).

SpinWorks 3: M. Kovacevic 2625 50 mM

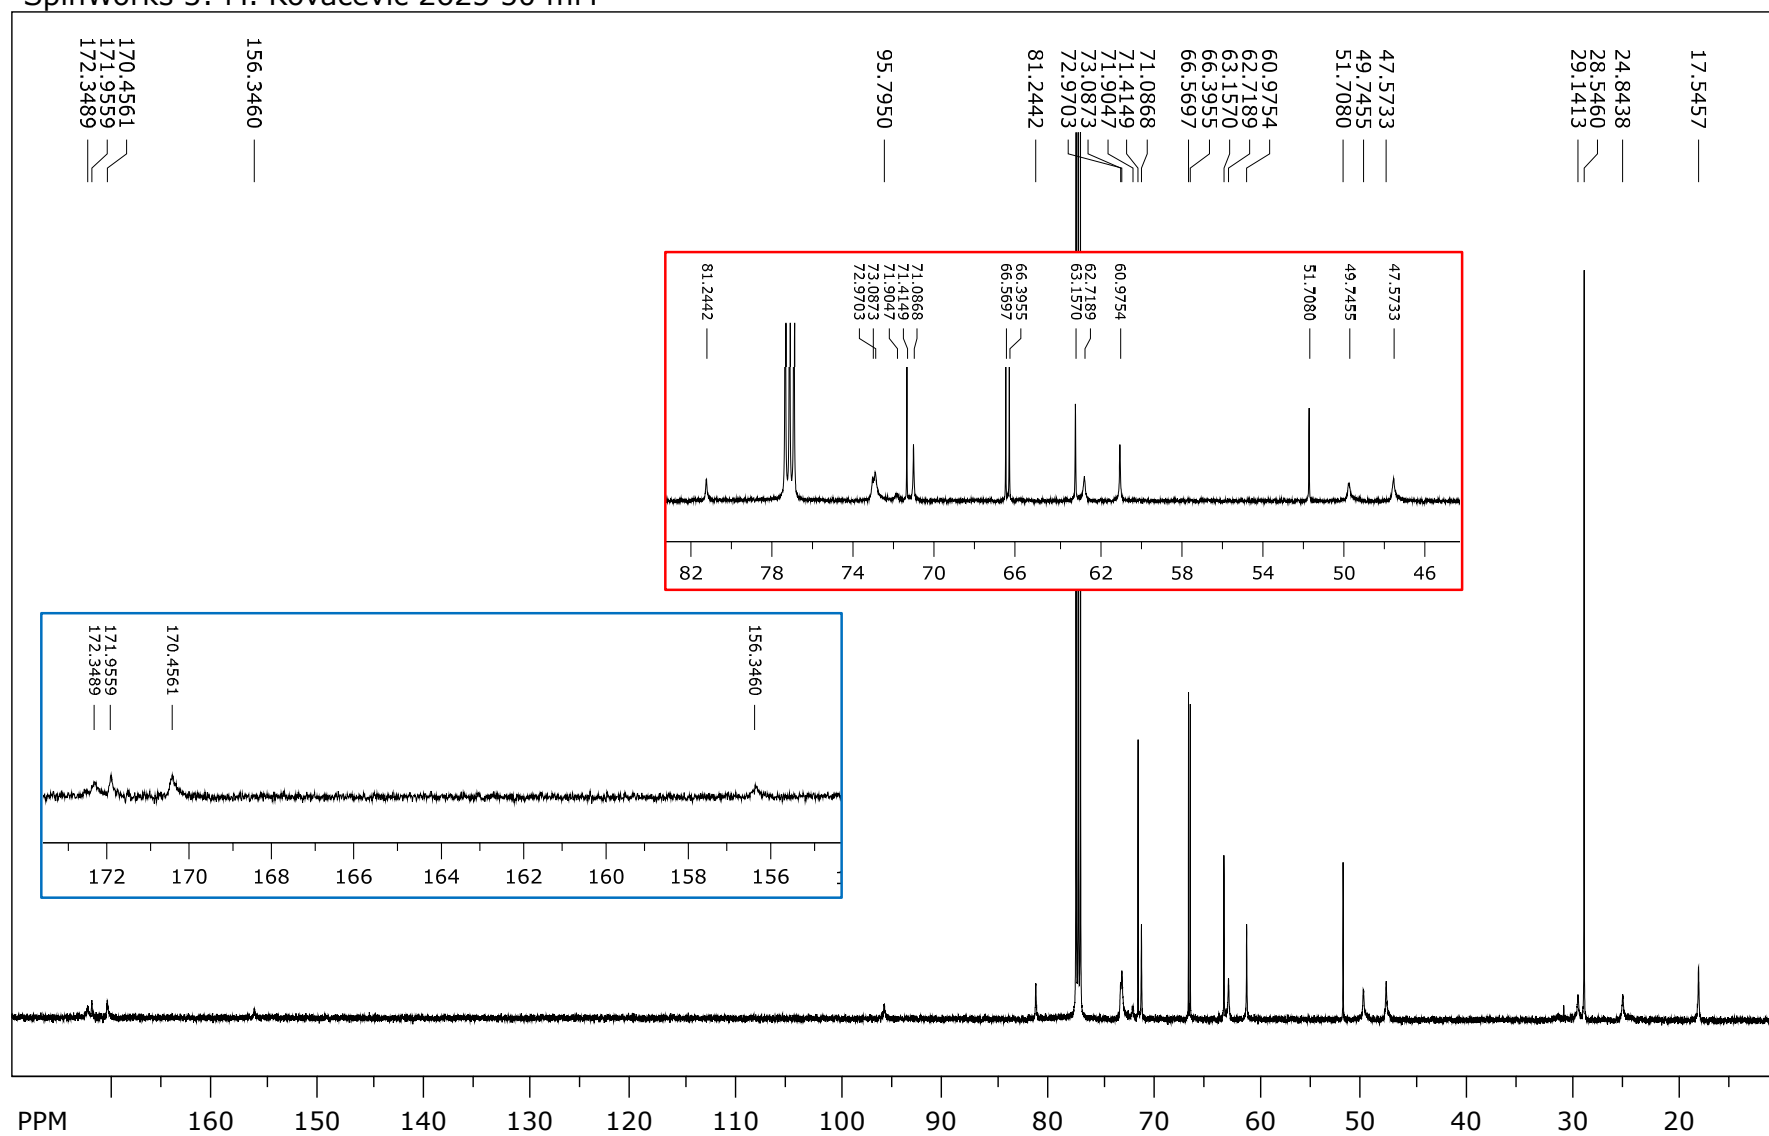

Figure S33.  $^{13}\text{C}\{^1\text{H}\}$  NMR spectrum of compound **4** ( $c = 5 \times 10^{-2}$  M).

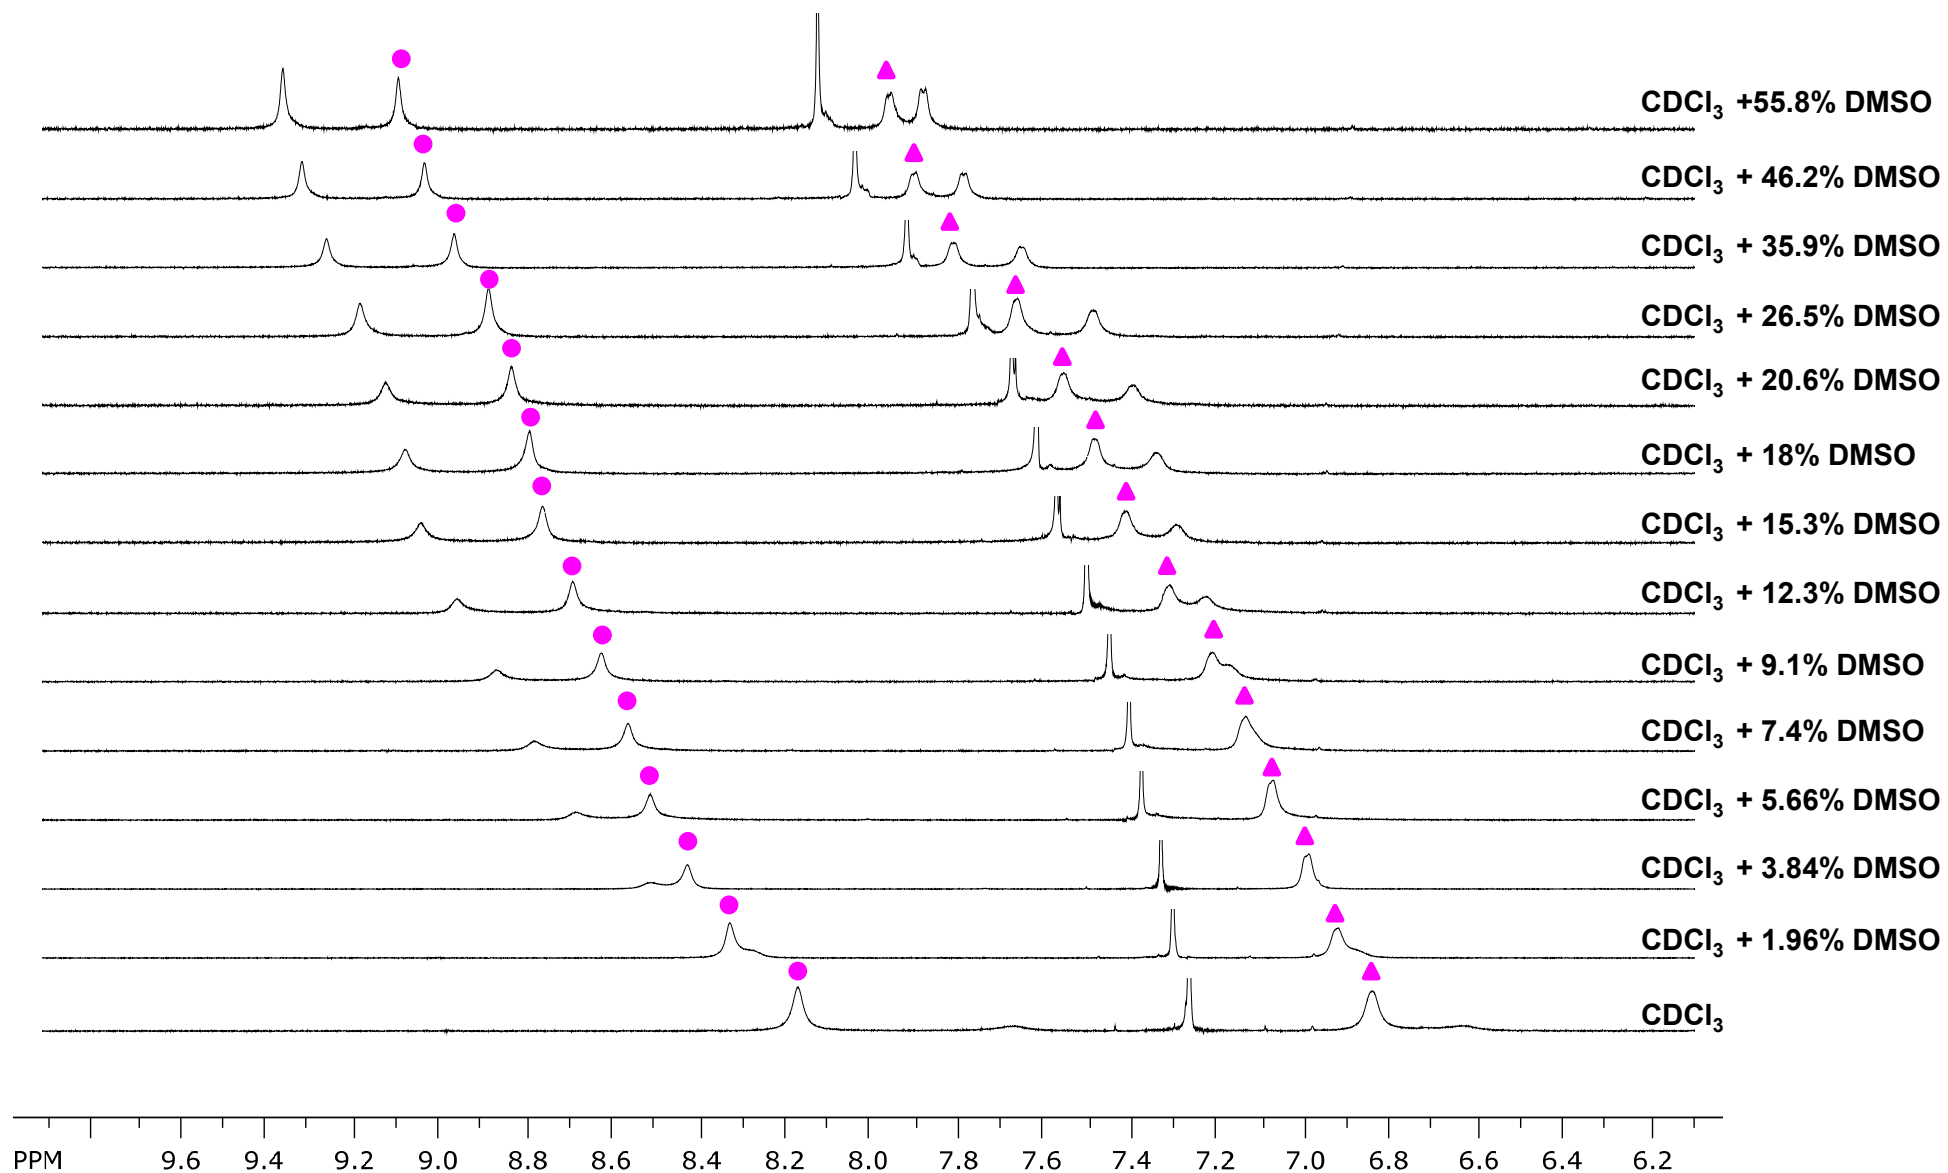

*Figure S34.* Solvent dependence of NH chemical shifts of compound **4** at varying concentrations of DMSO in CDCl<sub>3</sub> ( $c = 2.5 \times 10^{-2}$  M).

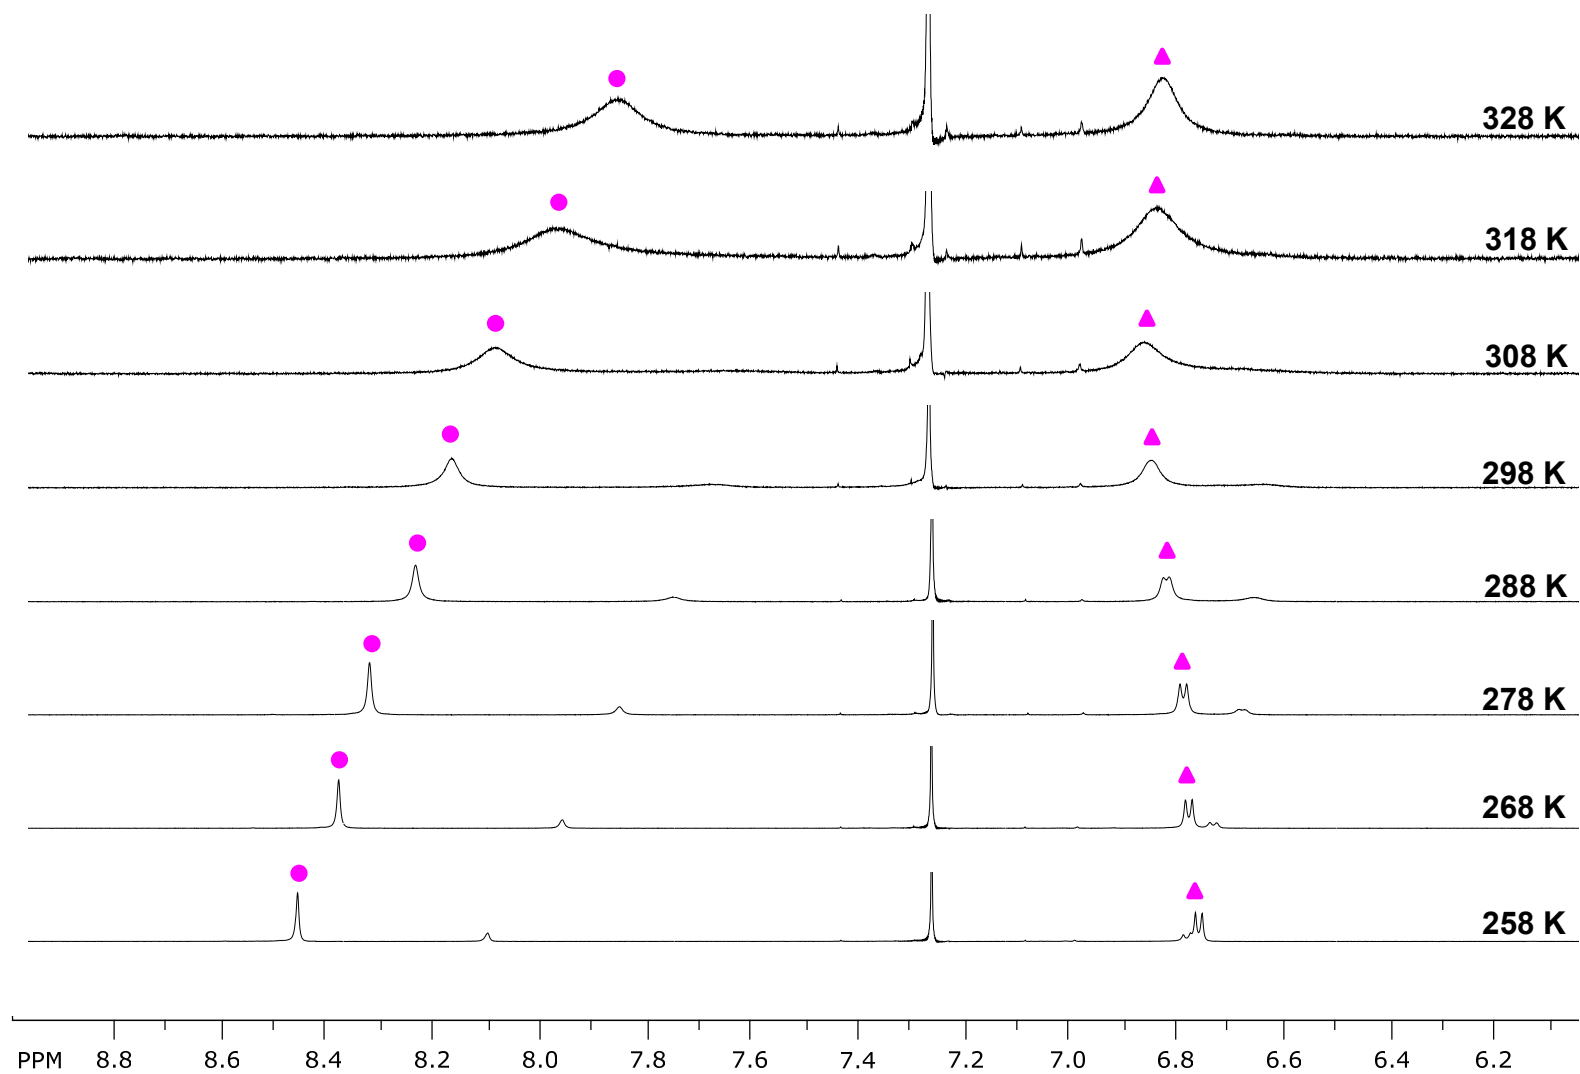

*Figure S35.* Temperature-dependent NH chemical shifts of compound **4** ( $c = 1 \times 10^{-2}$  M).

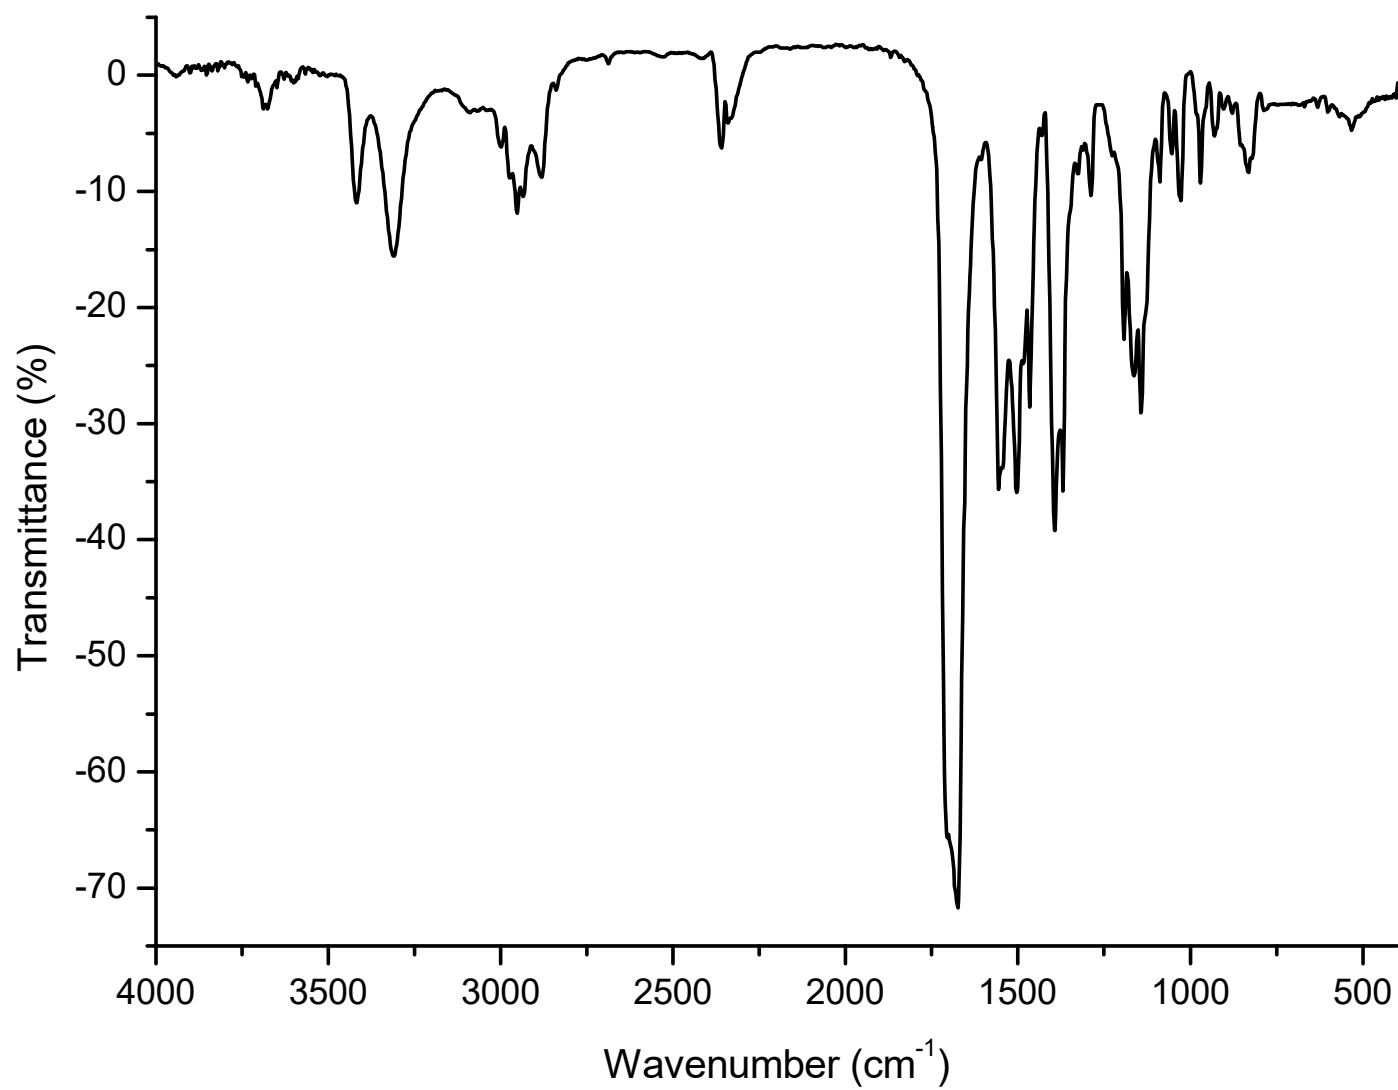

*Figure S36.* IR spectrum of compound **4** ( $c = 5 \times 10^{-2}$  M) in DCM.



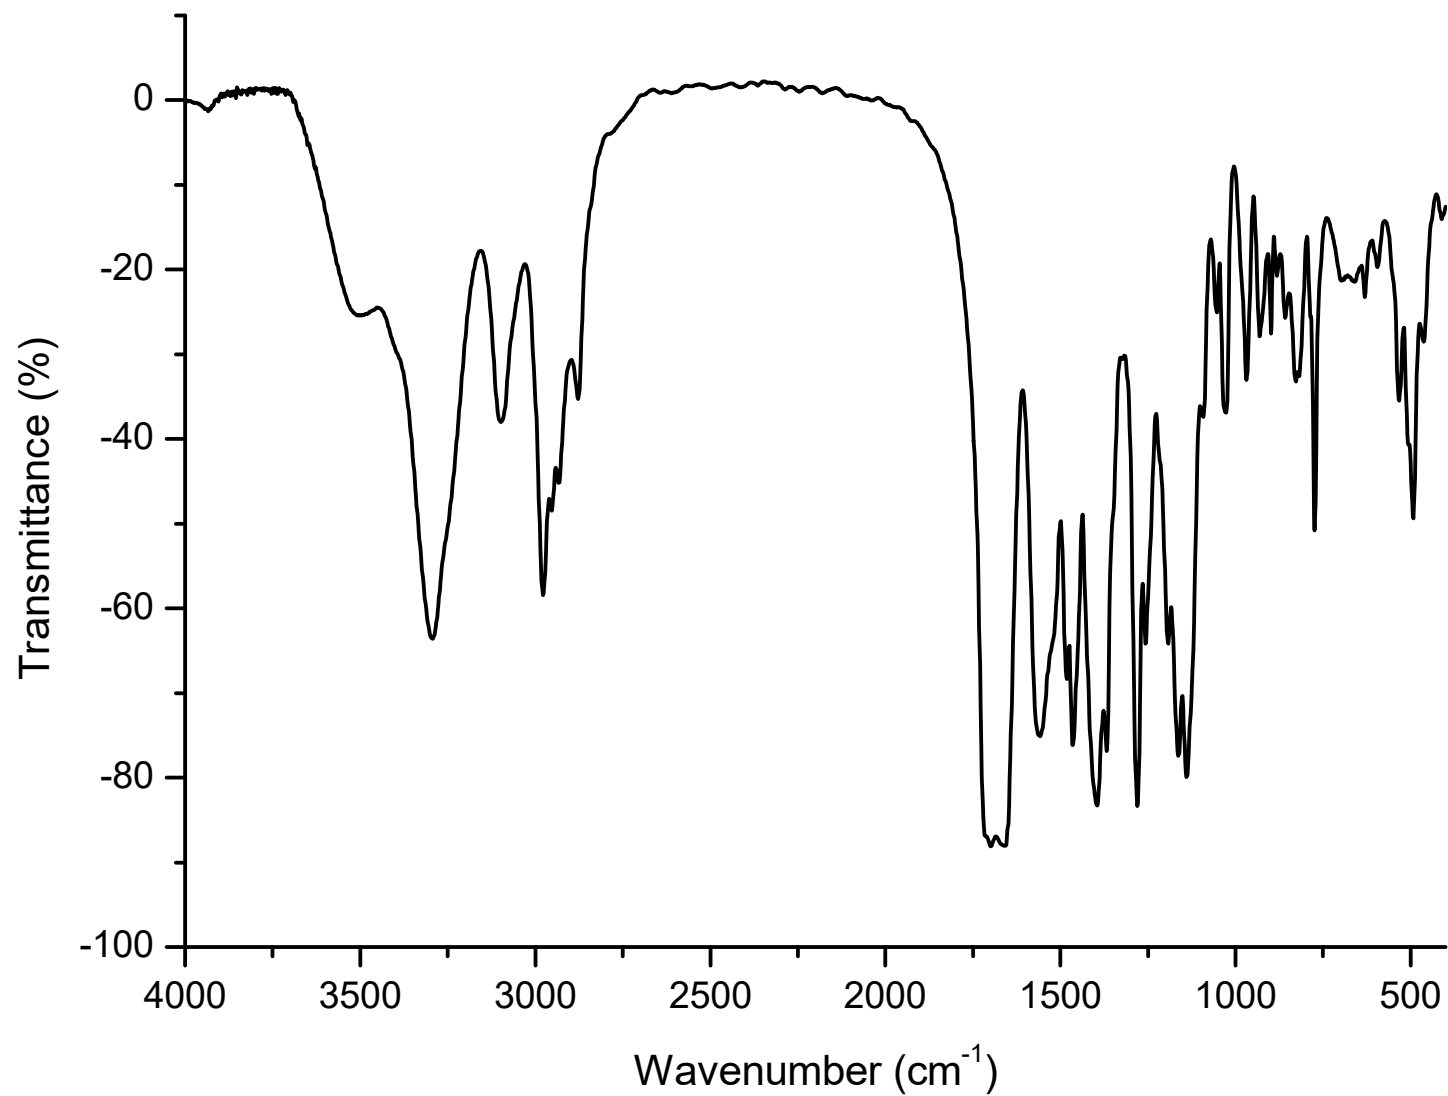

*Figure S37.* IR spectra of compound **4** (2 mg) in KBr (200 mg).

**Ac-L-Pro-L-Ala-NH-Fn-COOMe (5)**

| Ion type | Calc. mass | Measured mass | Mass error / ppm | Mol. Formula                                                     | Int. CAL    |
|----------|------------|---------------|------------------|------------------------------------------------------------------|-------------|
| M+       | 469.1300   | 469.1280      | 4.3              | C <sub>22</sub> H <sub>27</sub> N <sub>3</sub> O <sub>5</sub> Fe | azitromicin |

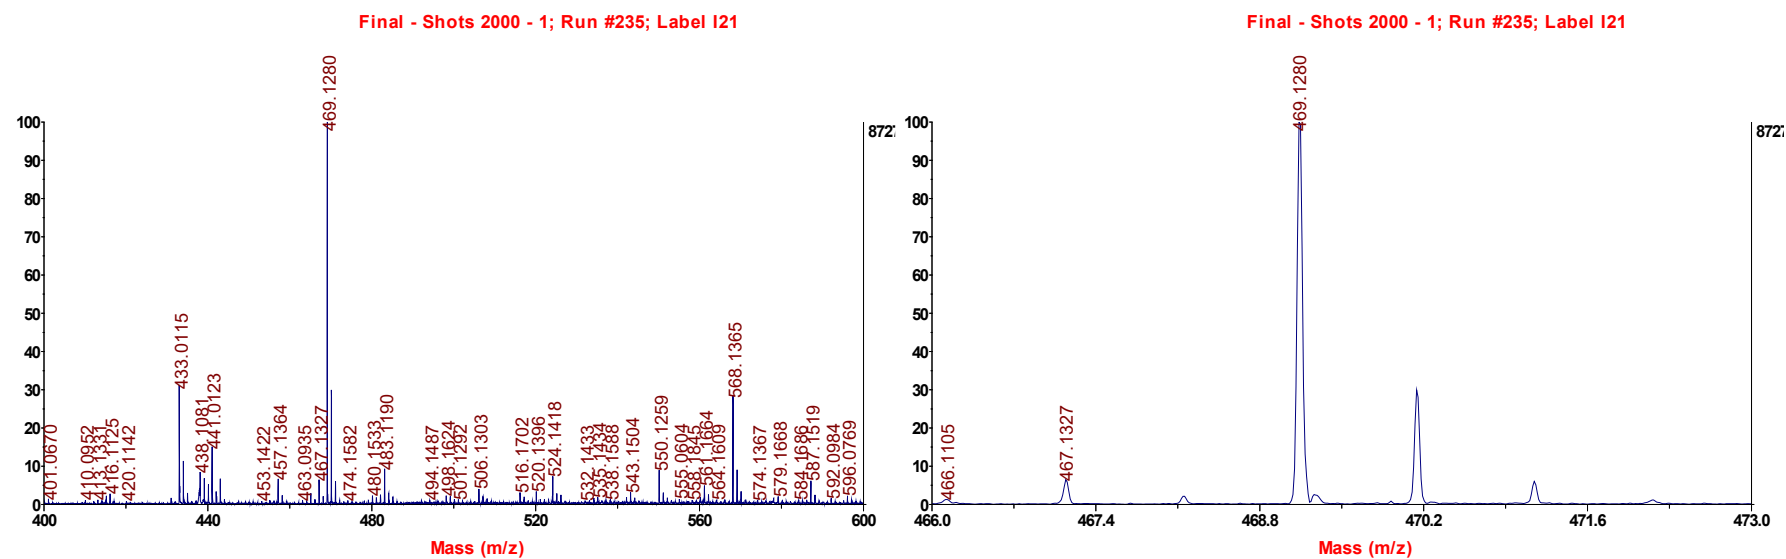

Figure S38. HRMS spectrum of compound 5.

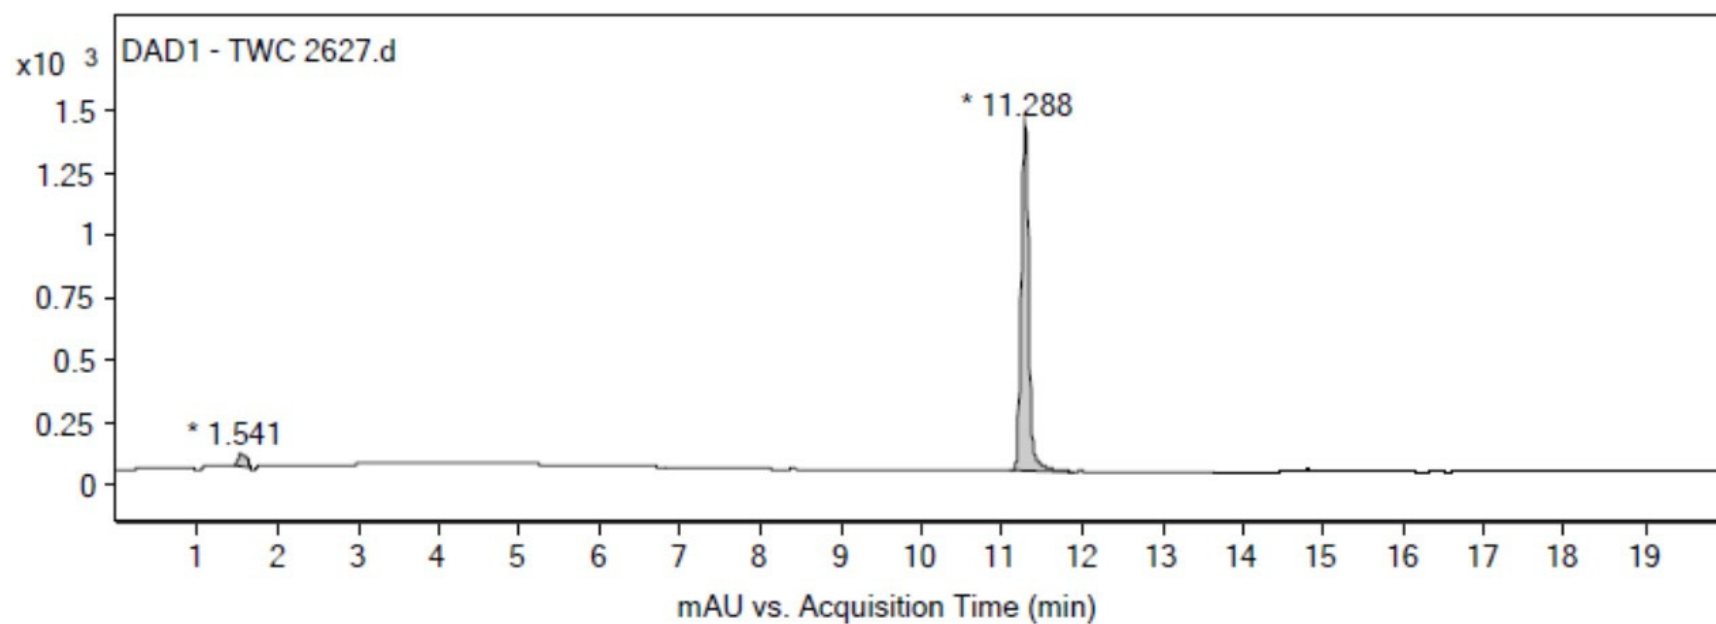

**Integration Peak List**

| Peak | Start  | RT     | End    | Height  | Area    | Area % |
|------|--------|--------|--------|---------|---------|--------|
| 1    | 1.461  | 1.541  | 1.648  | 46.76   | 329.46  | 3.47   |
| 2    | 11.101 | 11.288 | 11.881 | 1411.81 | 9488.61 | 100    |

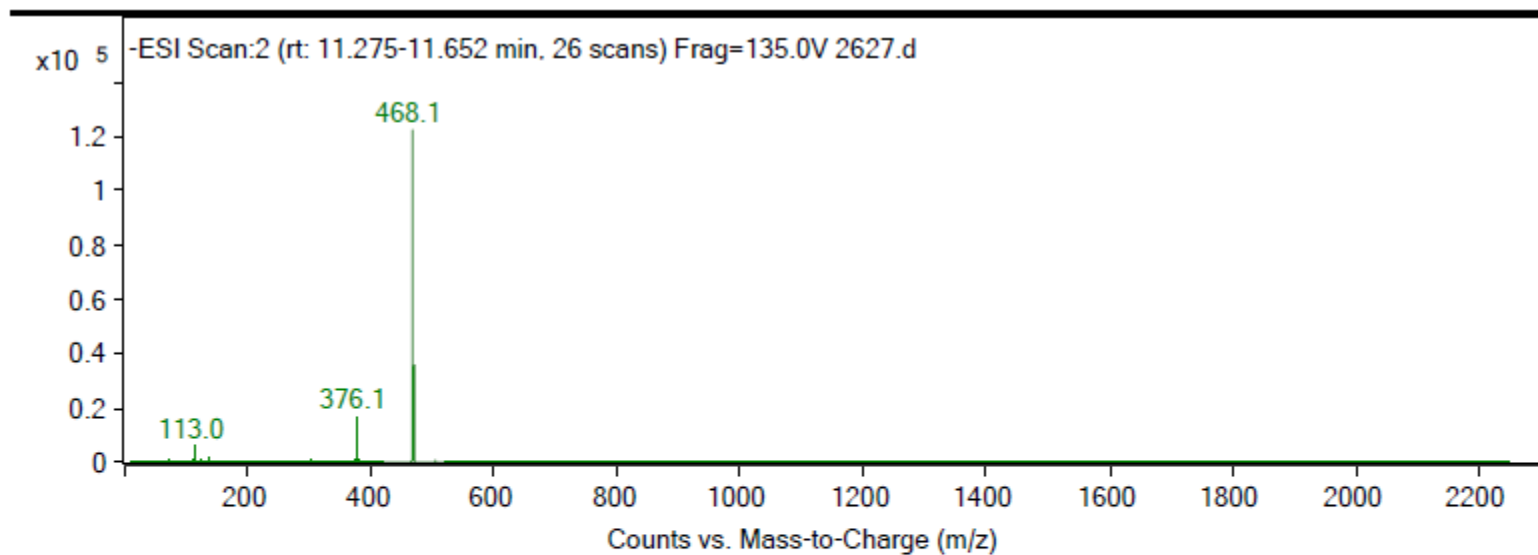

**Peak List**

| m/z   | z | Abund     |
|-------|---|-----------|
| 113   |   | 6106.96   |
| 137   |   | 1766.12   |
| 376.1 | 1 | 16761.93  |
| 377   | 1 | 2996.78   |
| 466.1 |   | 8795.53   |
| 468.1 | 1 | 122427.03 |
| 469.1 | 1 | 35895.96  |
| 470.1 | 1 | 6283.23   |

*Figure S39.* HPLC-ESI spectra of compound 5.

SpinWorks 3: M. Kovacevic 2627 50 mM

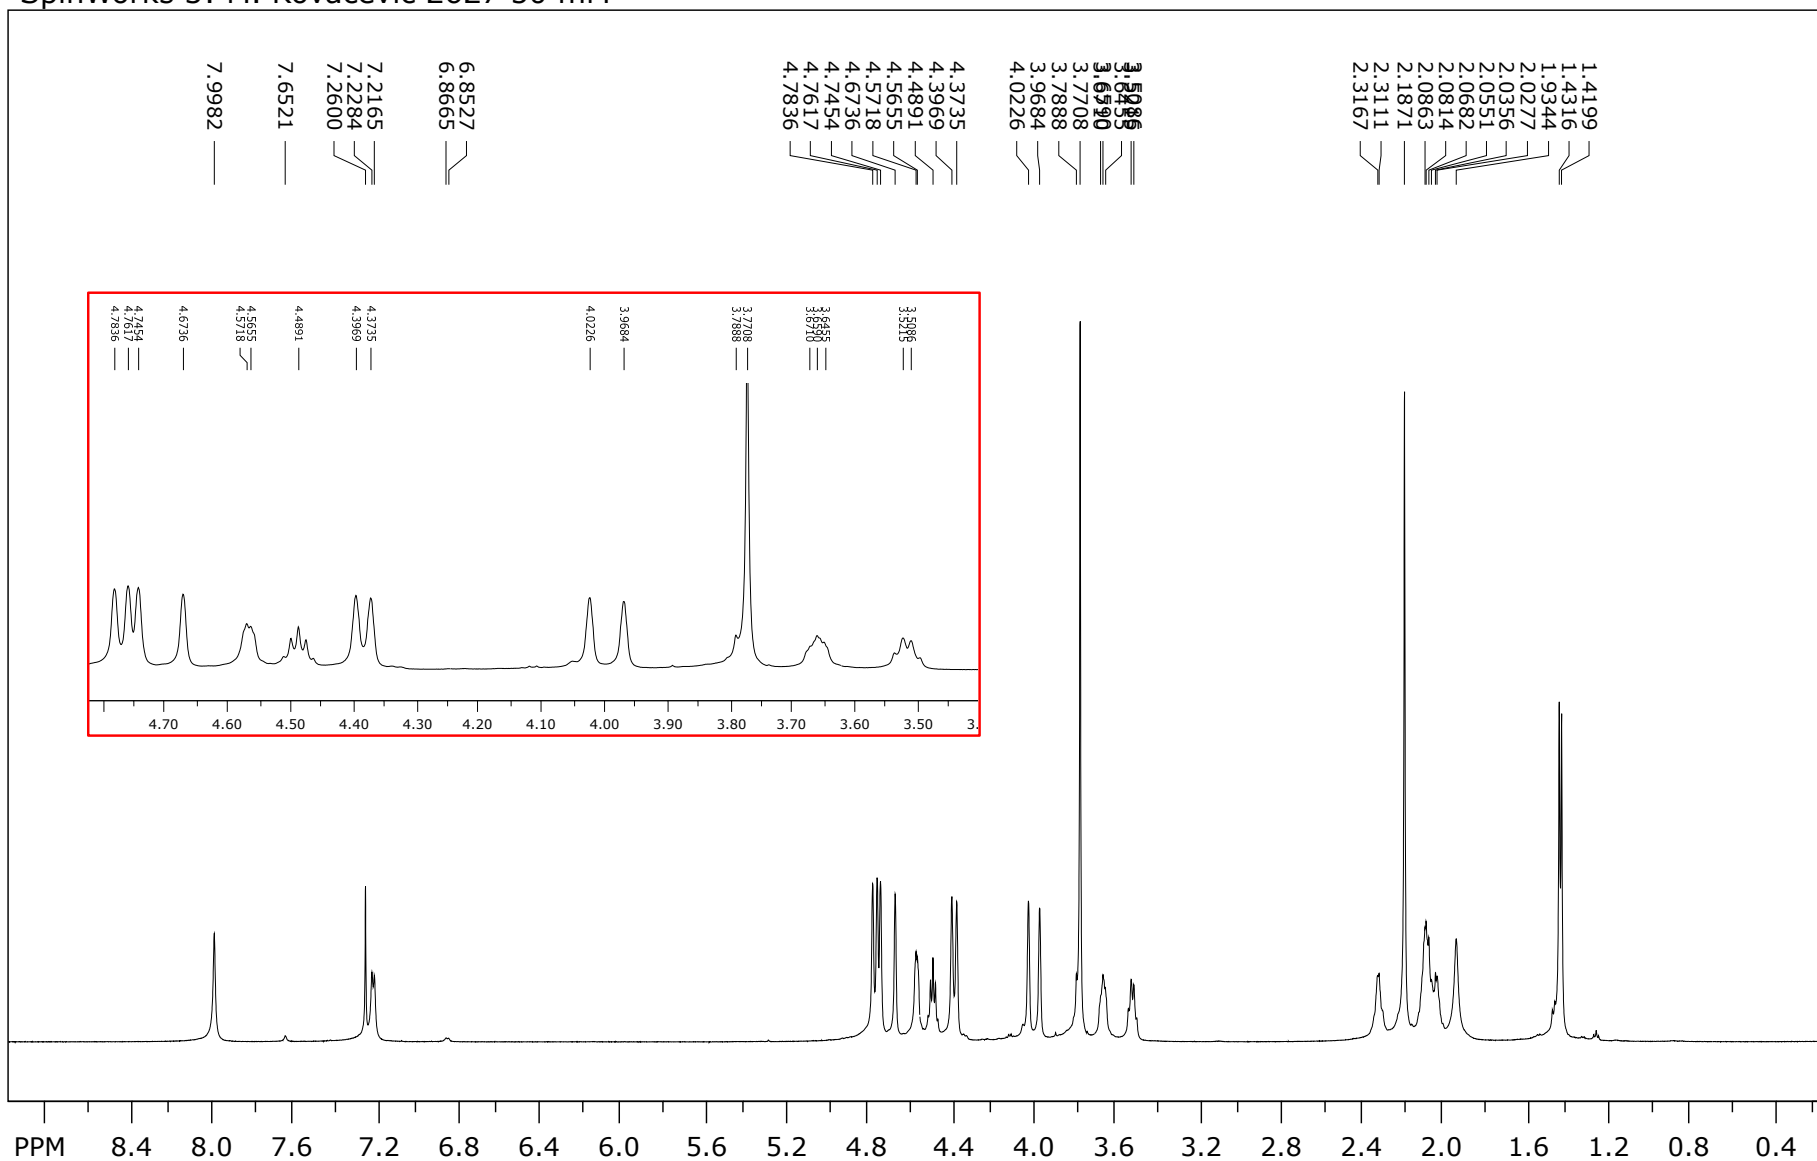

Figure S40.  $^1\text{H}$  NMR spectrum of compound **5** ( $c = 5 \times 10^{-2}$  M).

SpinWorks 3: M. Kovacevic 2627 50 mM

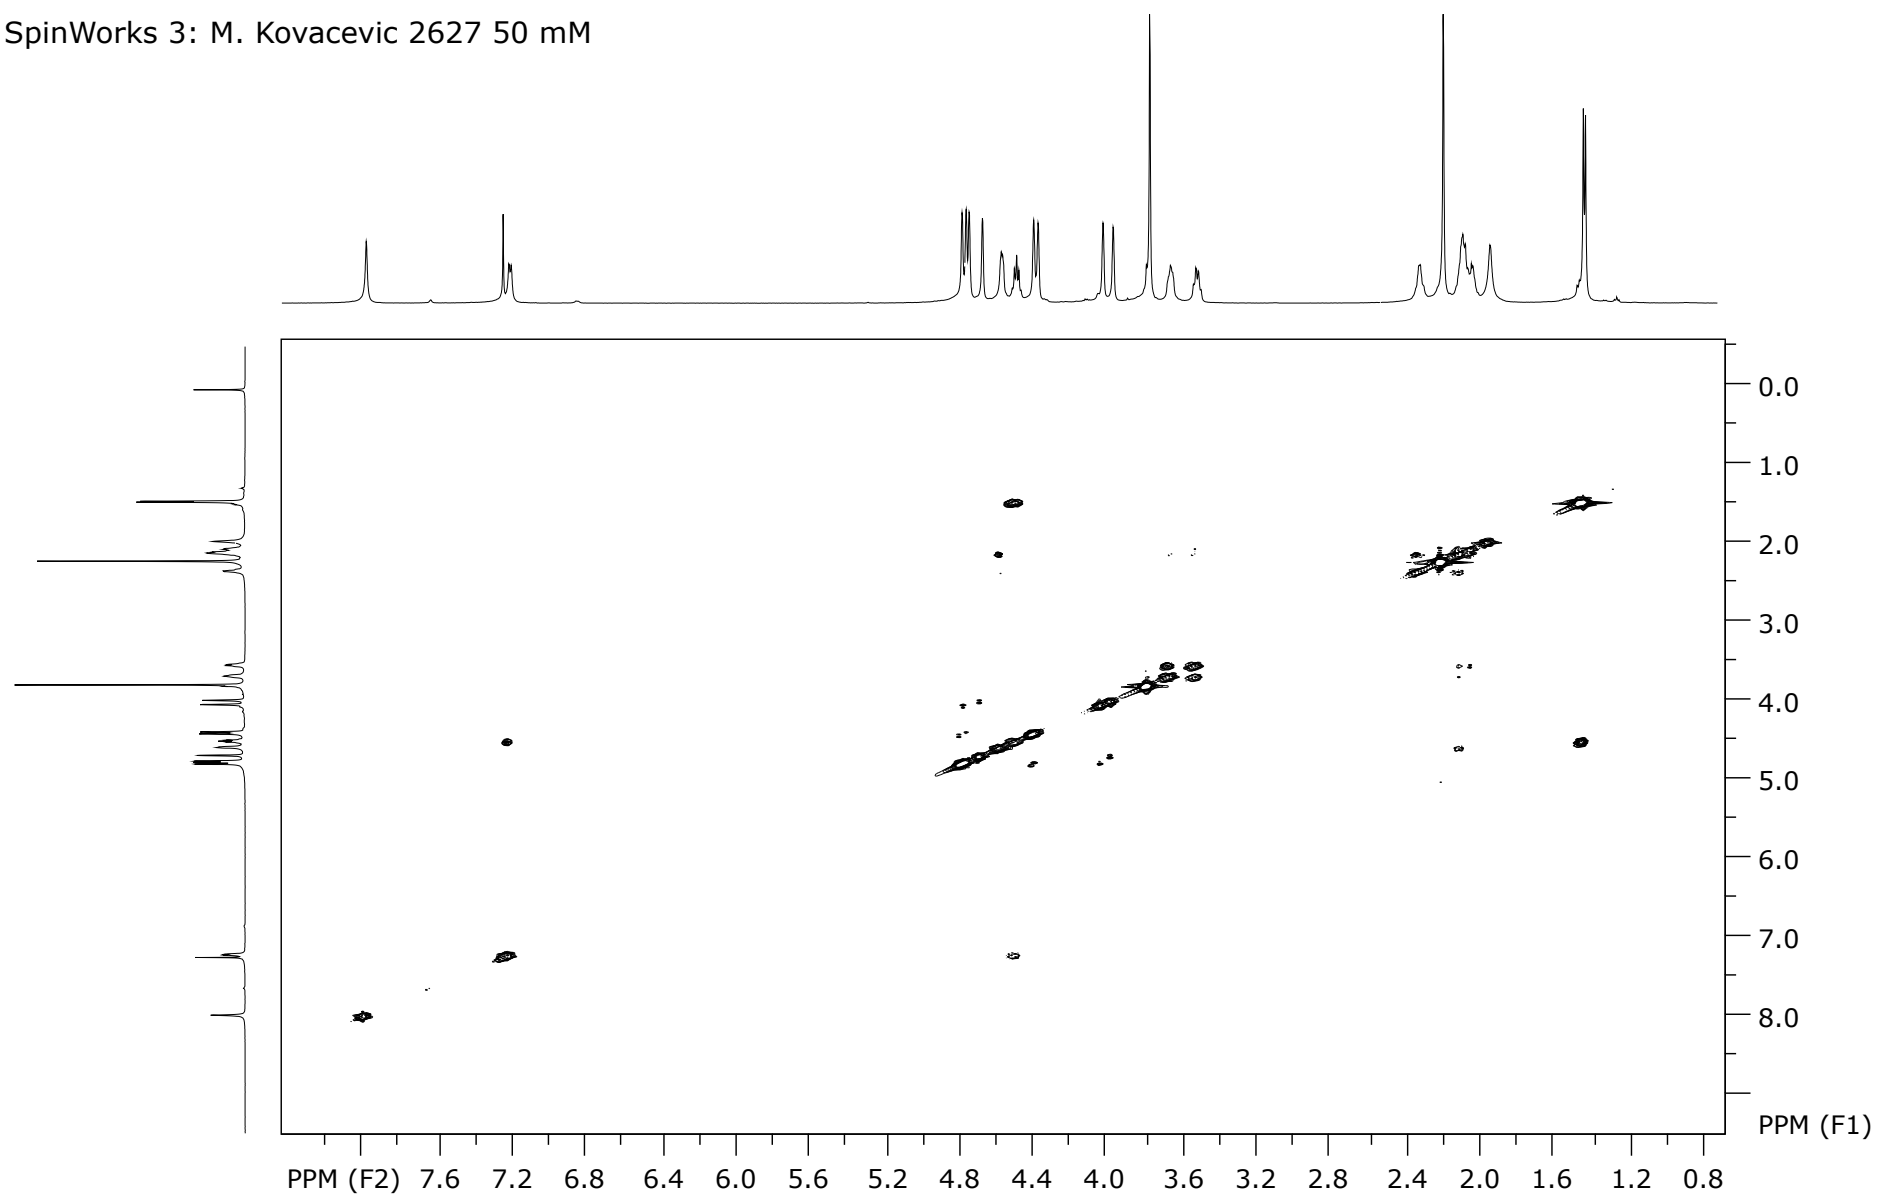

**Figure S41.**  $^1\text{H}$ - $^1\text{H}$  COSY NMR spectrum of compound **5** ( $c = 5 \times 10^{-2}$  M).

SpinWorks 3: M. Kovacevic 2627 50 mM

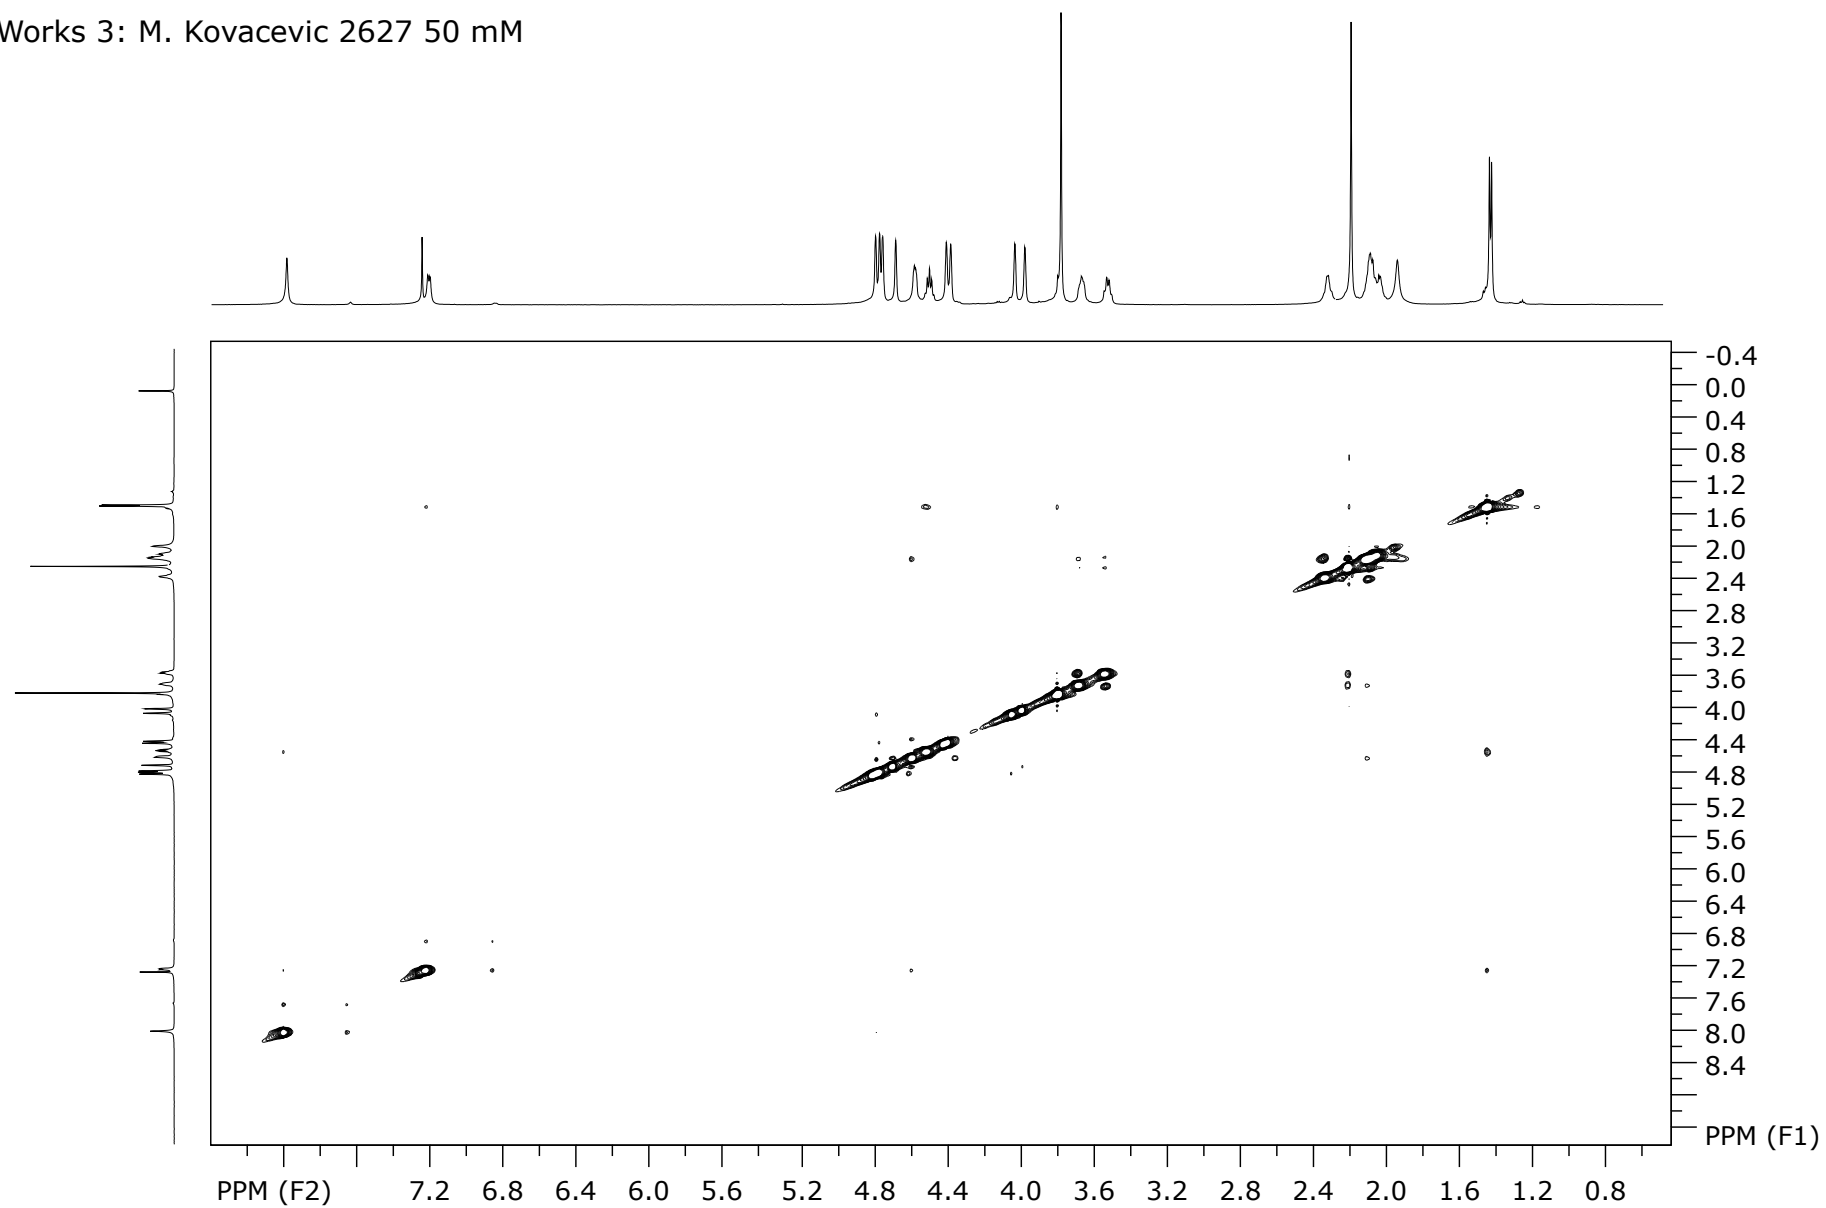

**Figure S42.**  $^1\text{H}$ - $^1\text{H}$  NOESY NMR spectrum of compound **5** ( $c = 5 \times 10^{-2}$  M).

SpinWorks 3: M. Kovacevic 2627 50 mM

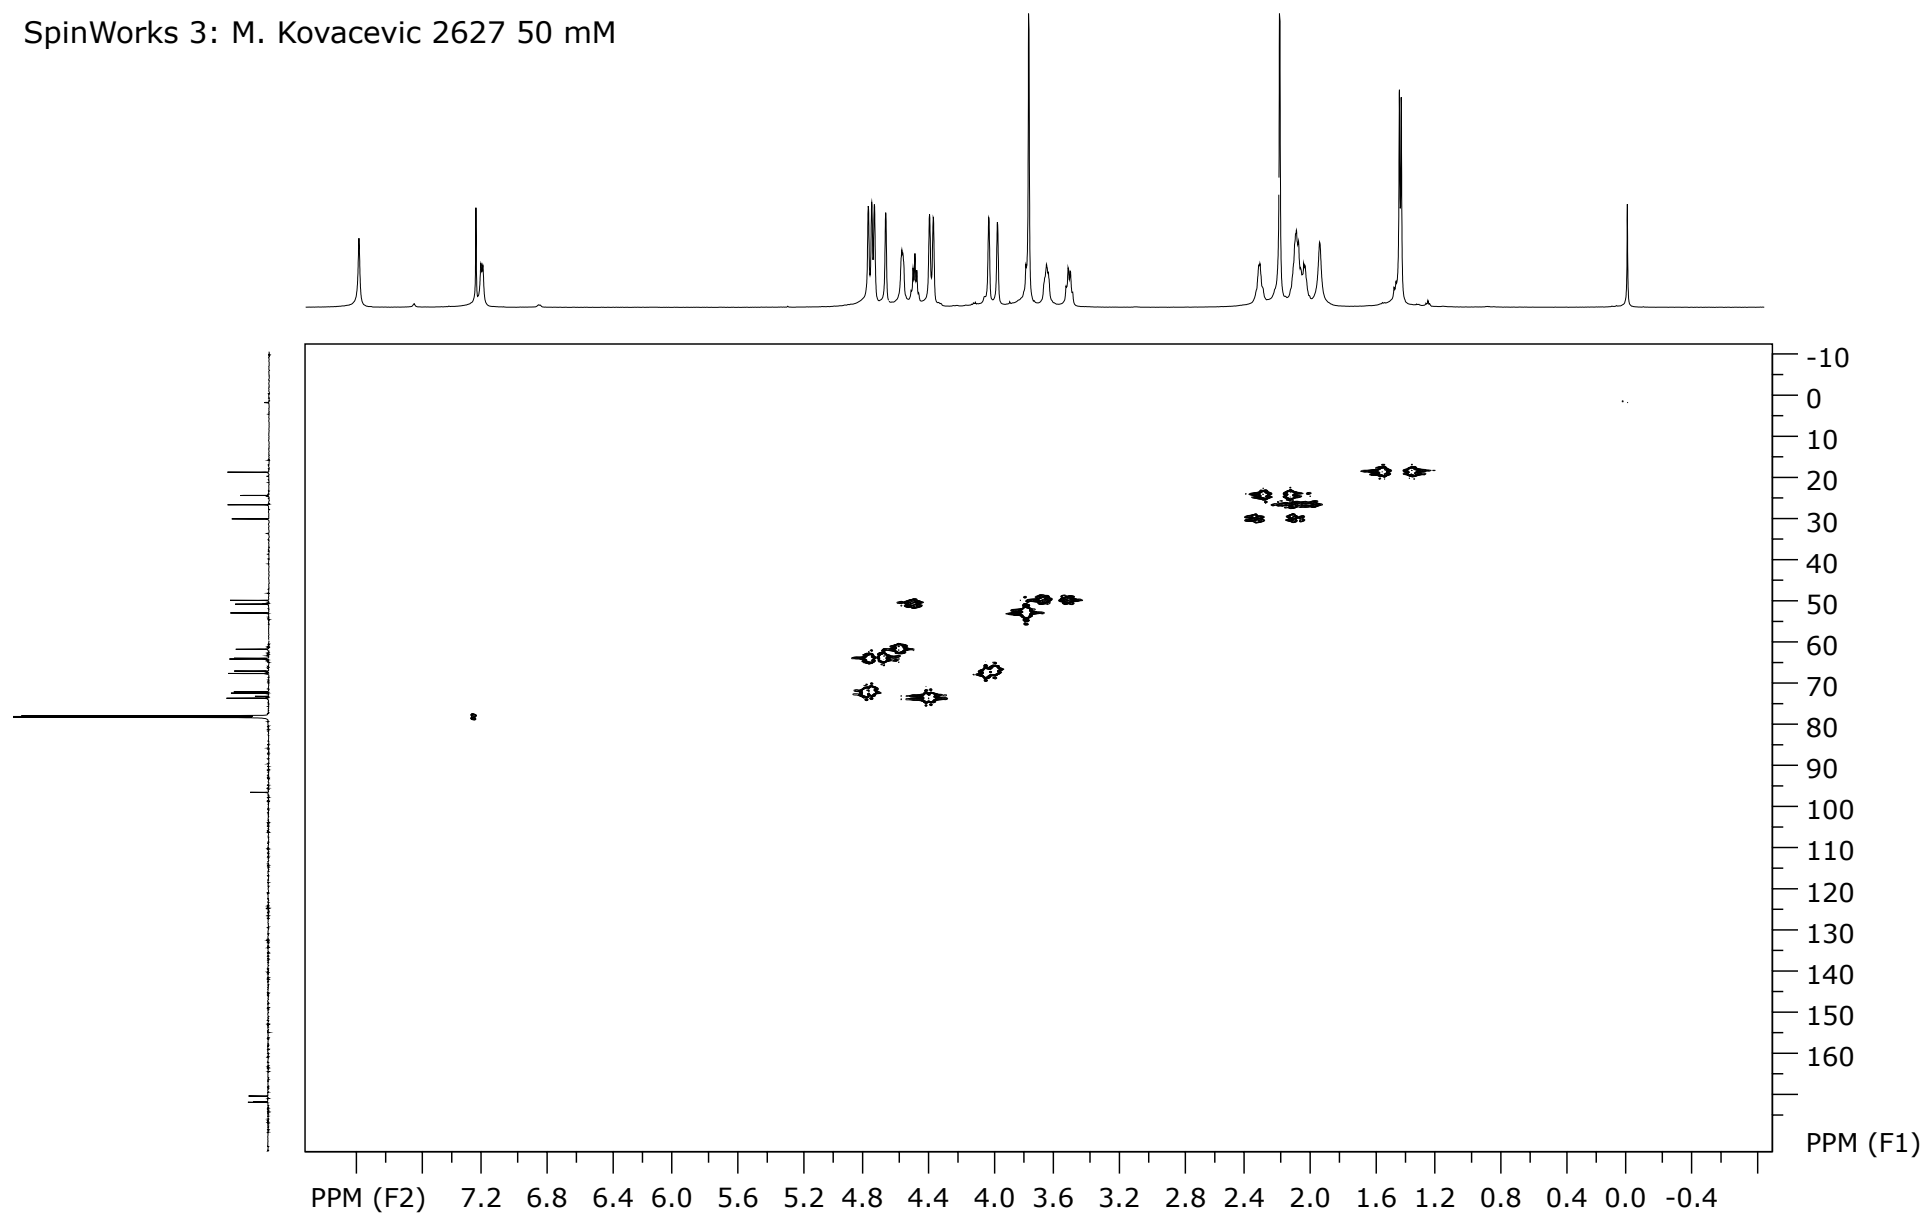

Figure S43.  $^1\text{H}$ - $^{13}\text{C}$  HMQC spectrum of compound **5** ( $c = 5 \times 10^{-2}$  M).



SpinWorks 3: M. Kovacevic 2627 50 mM

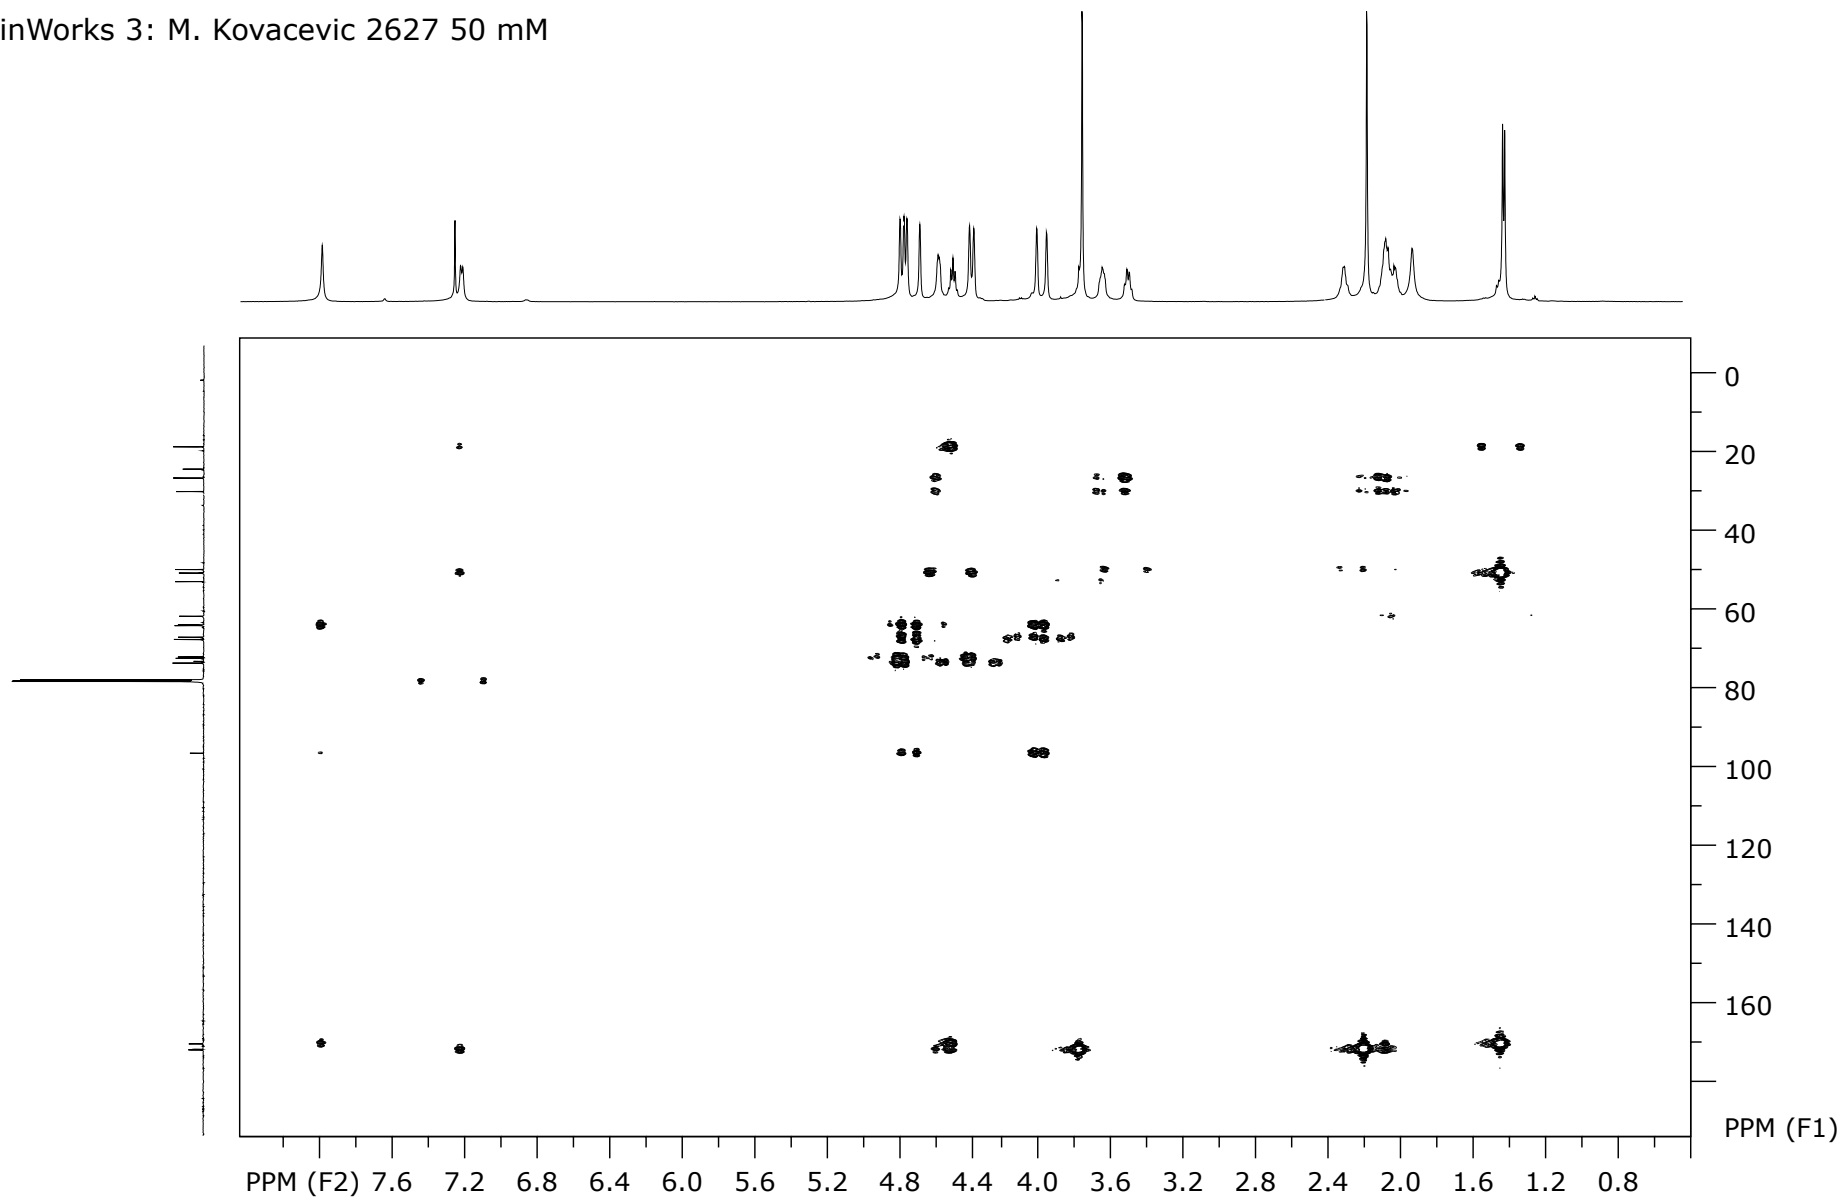

**Figure S44.**  $^1\text{H}$ - $^{13}\text{C}$  HMBC spectrum of compound 5 ( $c = 5 \times 10^{-2}$  M).

SpinWorks 3: M. Kovacevic 2627 50 mM

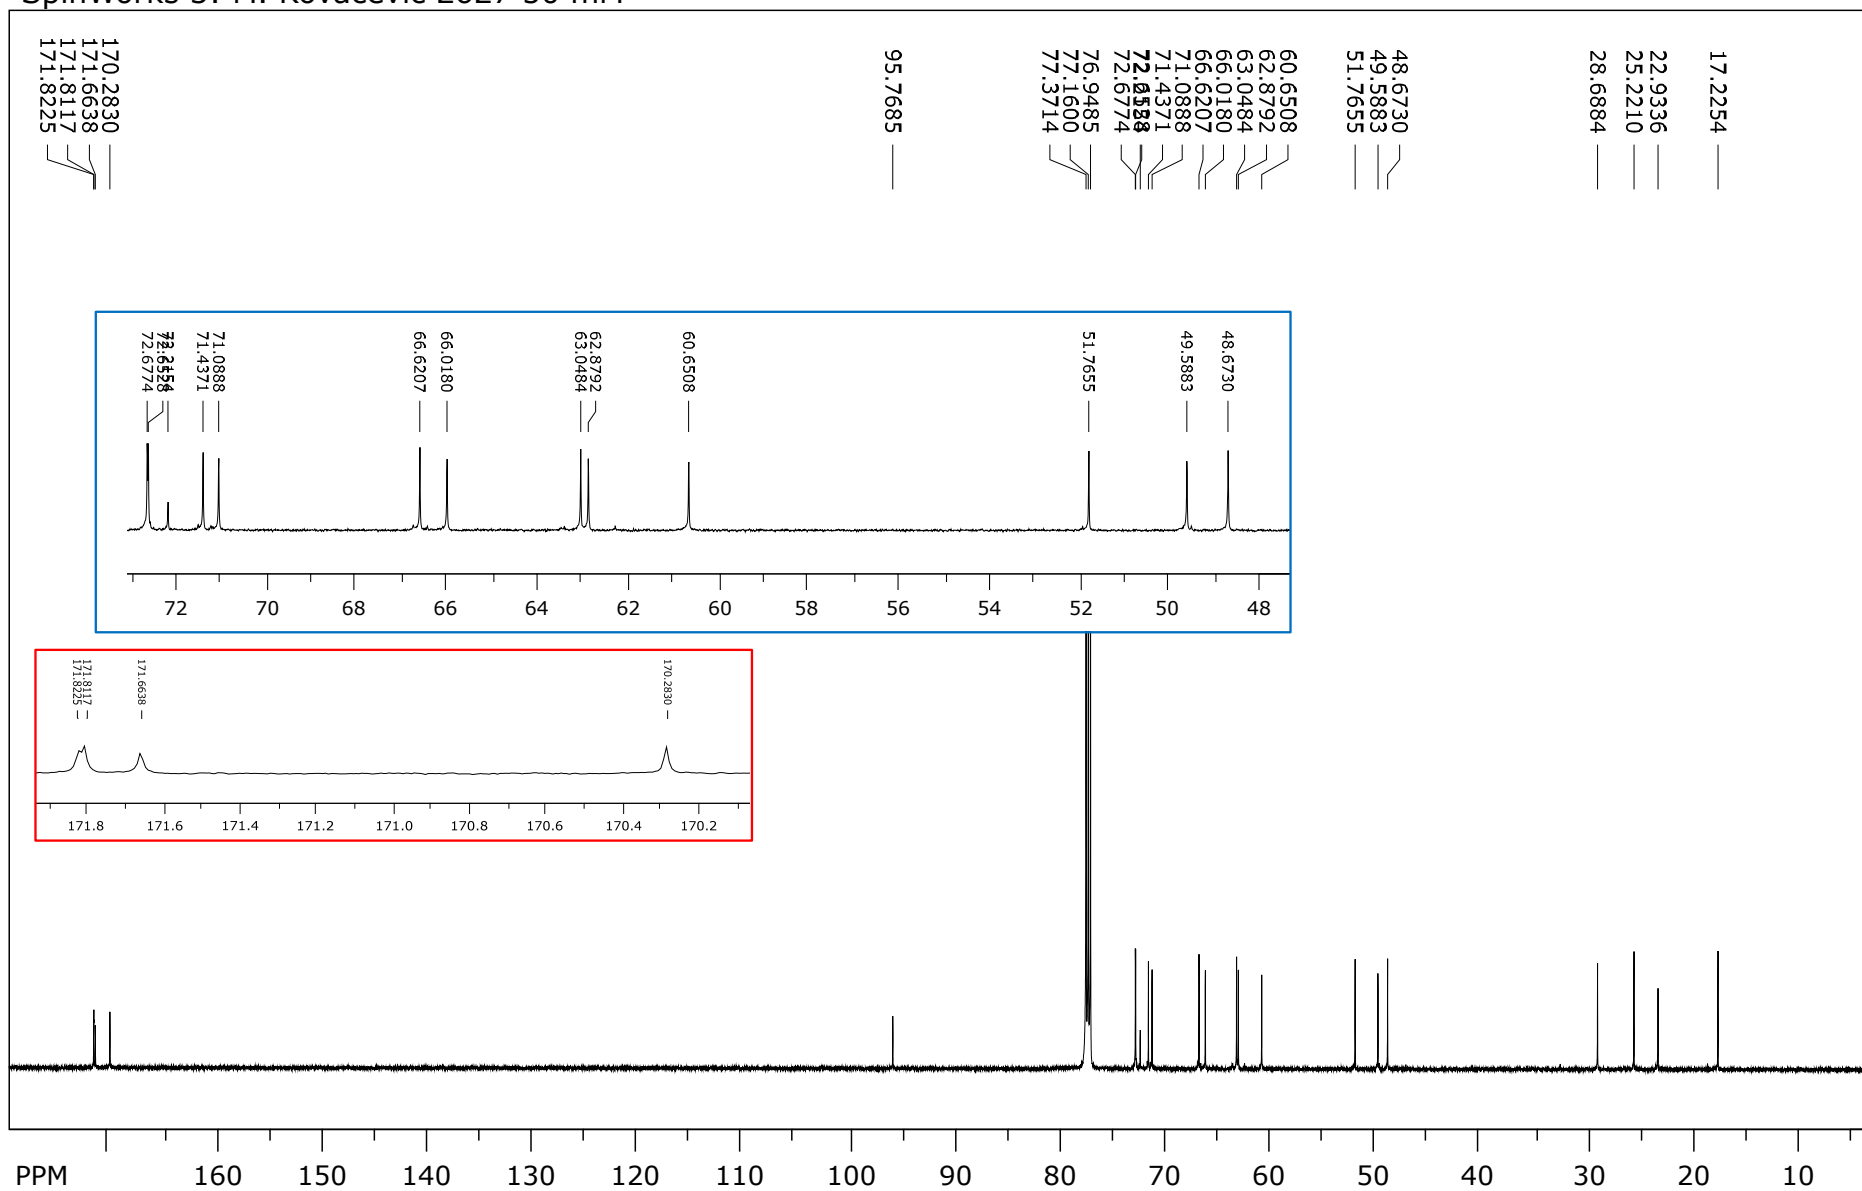

Figure S45.  $^{13}\text{C}\{^1\text{H}\}$  NMR spectrum of compound **5** ( $c = 5 \times 10^{-2}$  M).

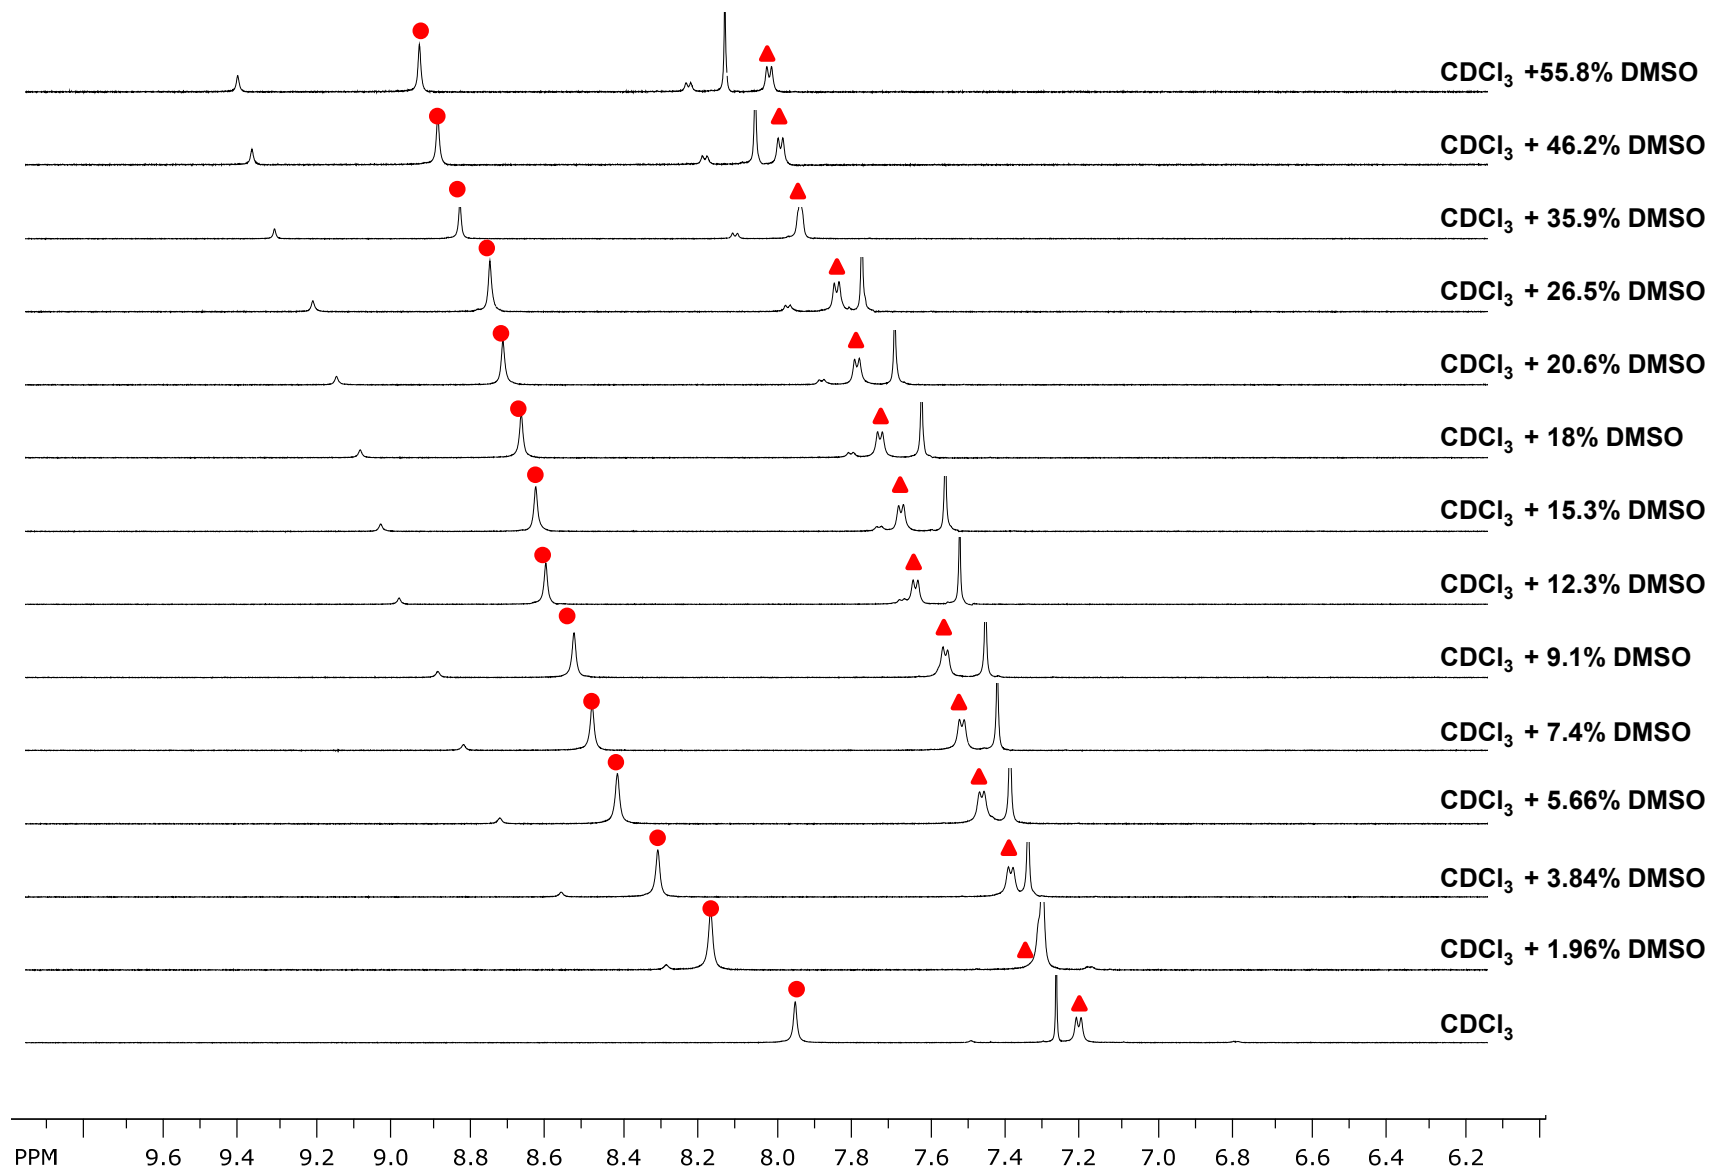

**Figure S46.** Solvent dependence of NH chemical shifts of compound **5** at varying concentrations of DMSO in  $\text{CDCl}_3$  ( $c = 2.5 \times 10^{-2}$  M).

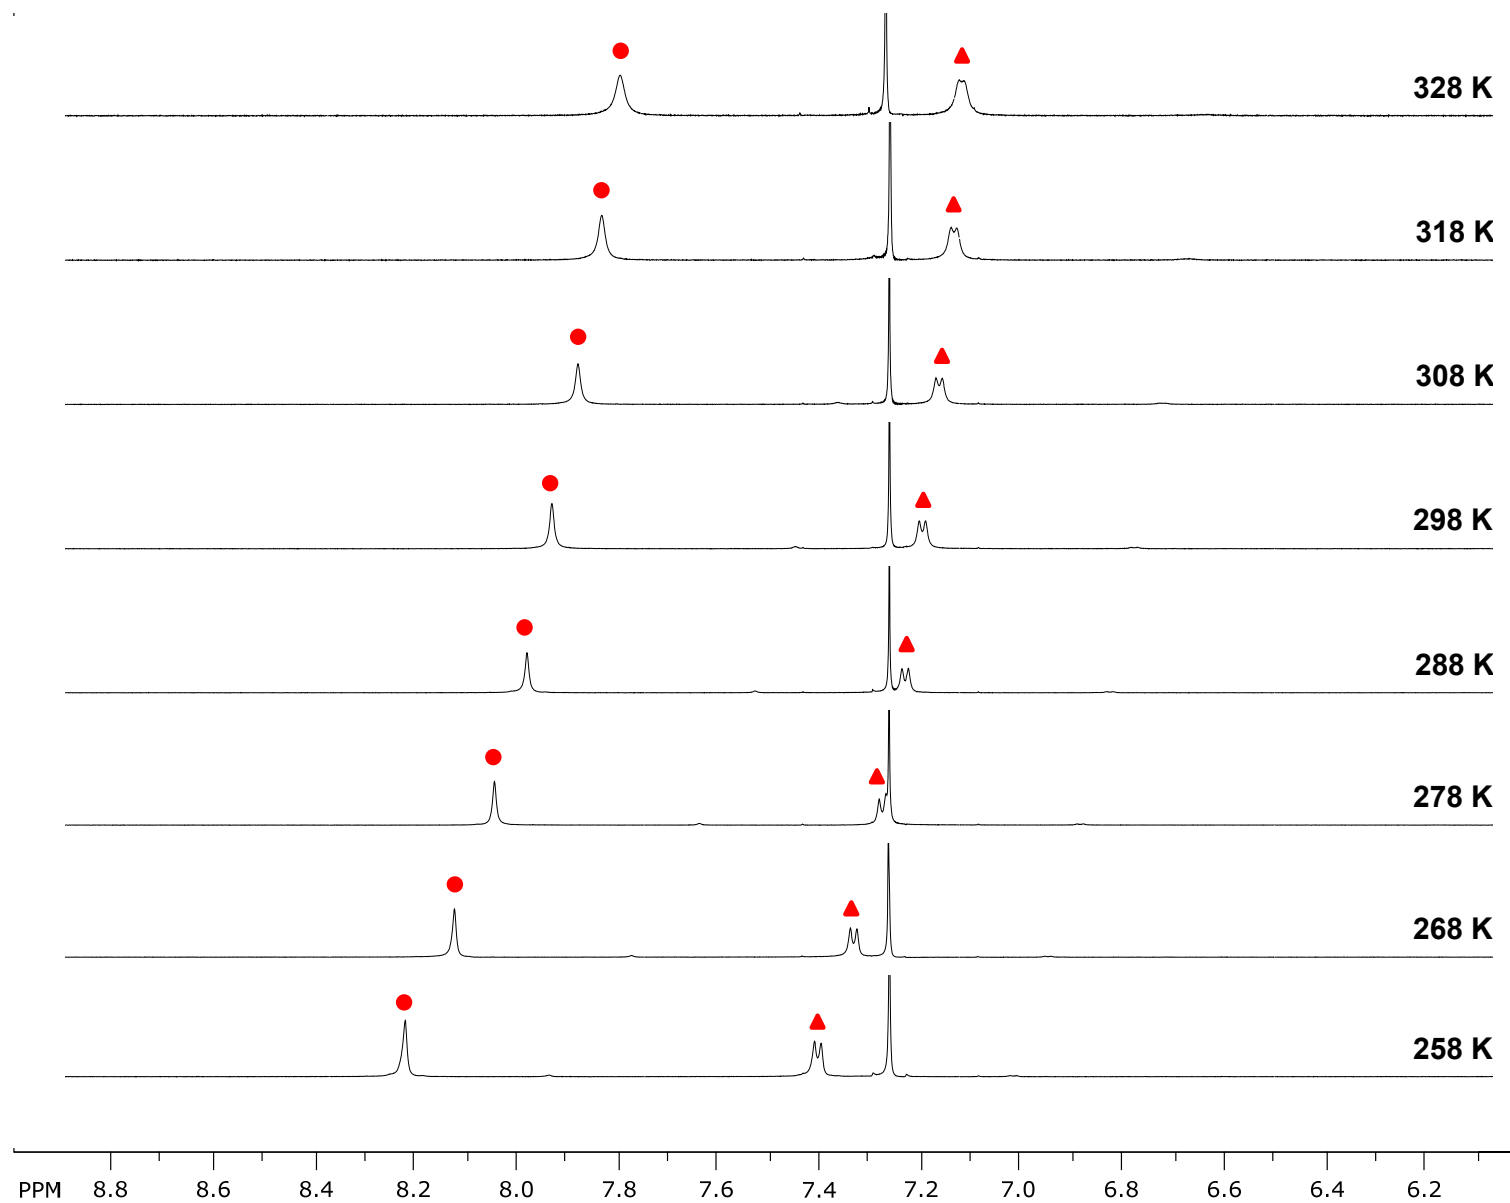

*Figure S47.* Temperature-dependent NH chemical shifts of compound **5** ( $c = 1 \times 10^{-2}$  M).

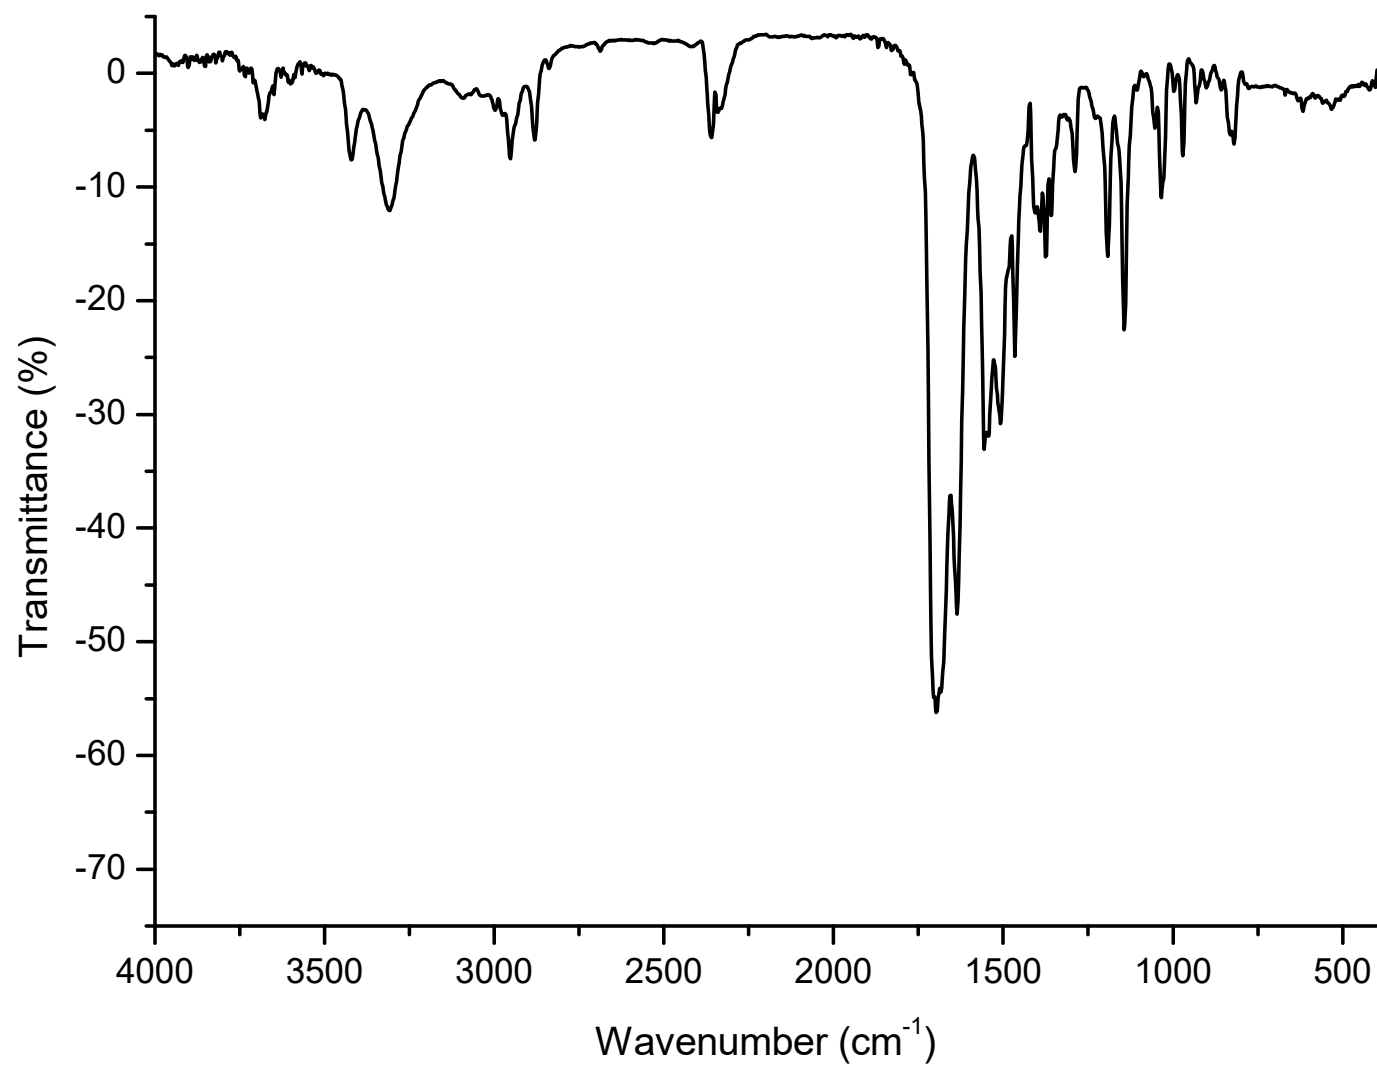

*Figure S48.* IR spectrum of compound **5** ( $c = 5 \times 10^{-2}$  M) in DCM.

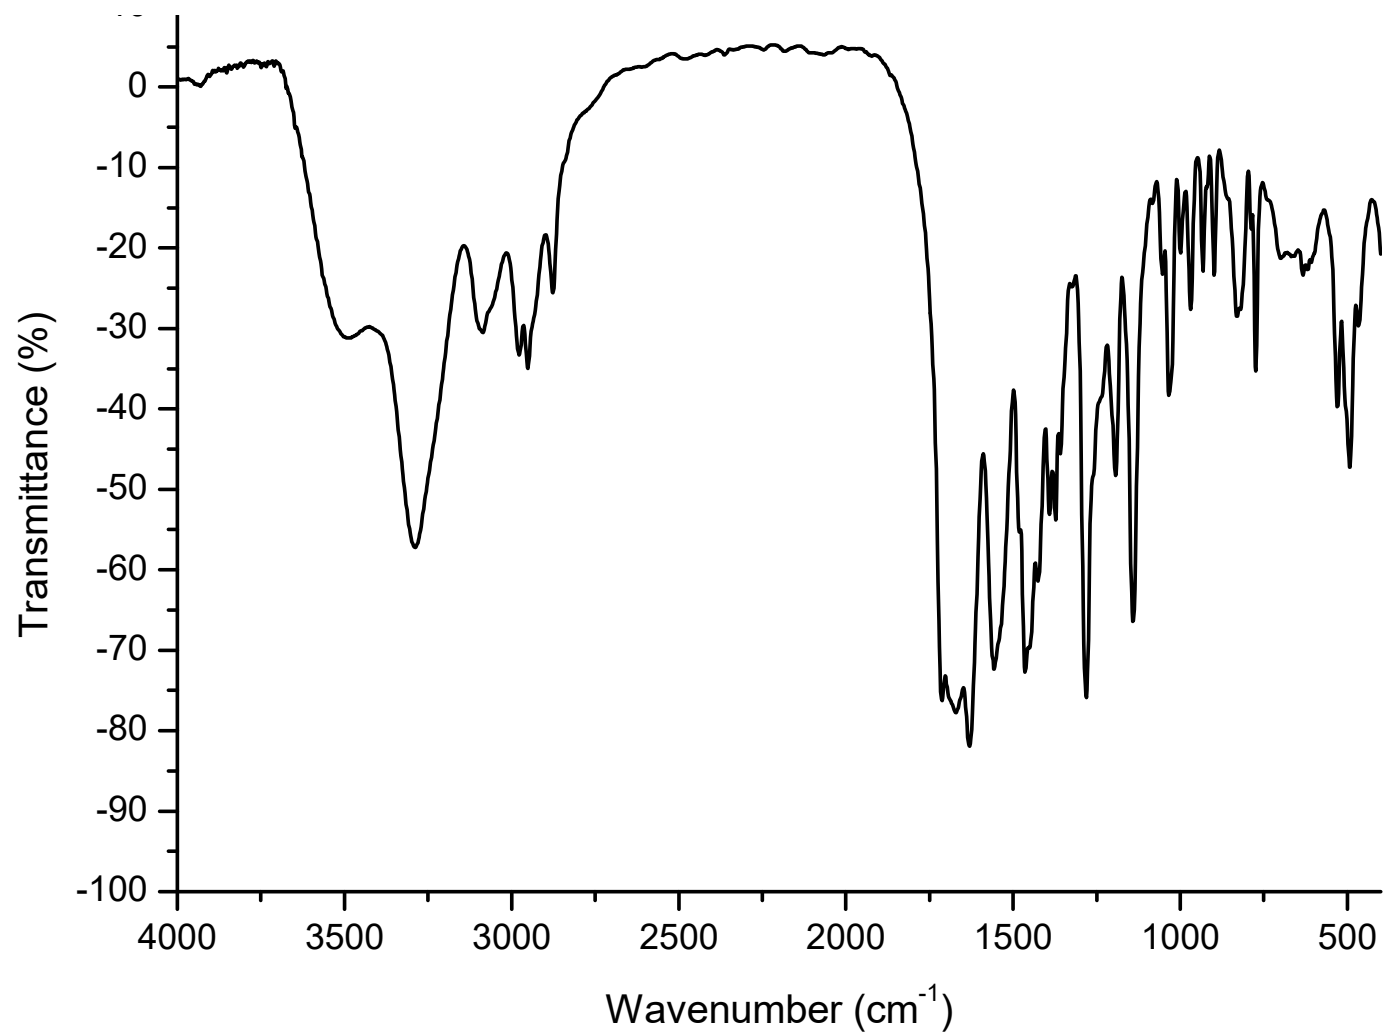

*Figure S49.* IR spectrum of compound **5** (2 mg) in KBr (200 mg).

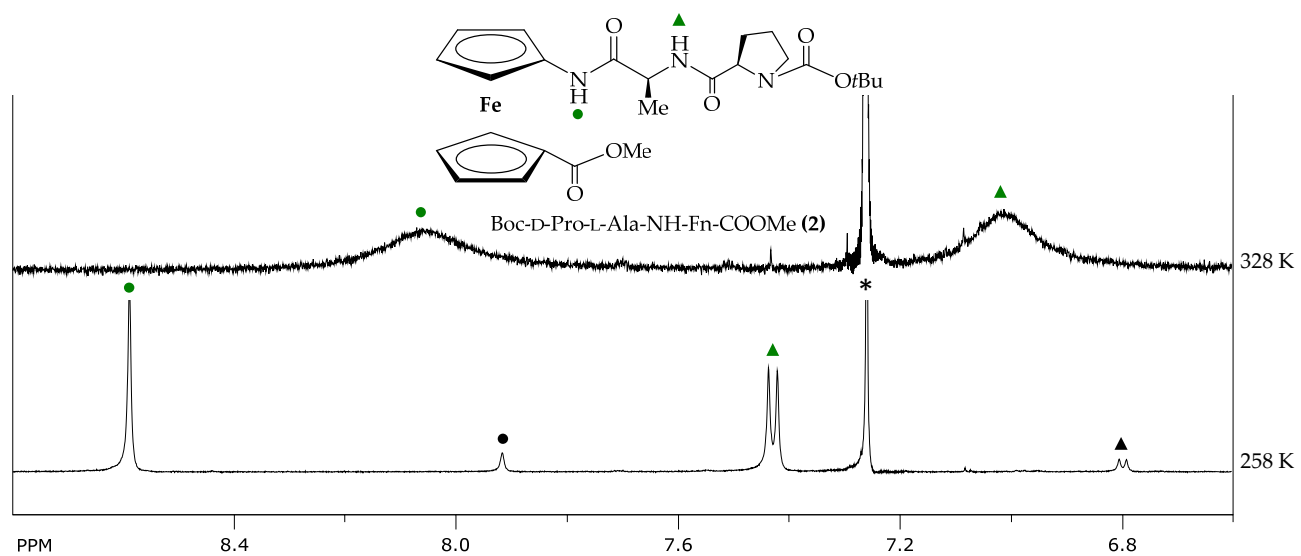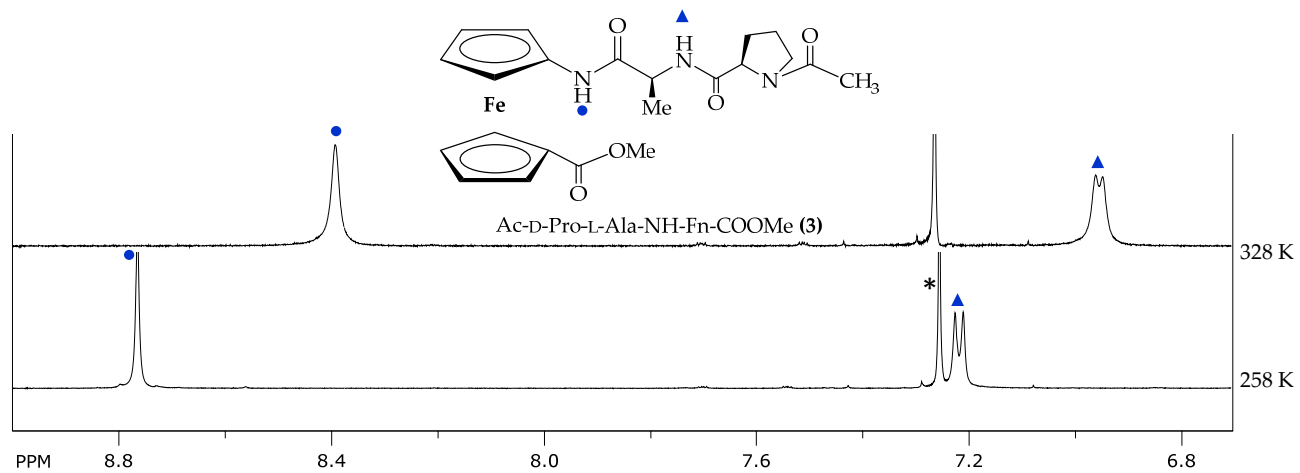

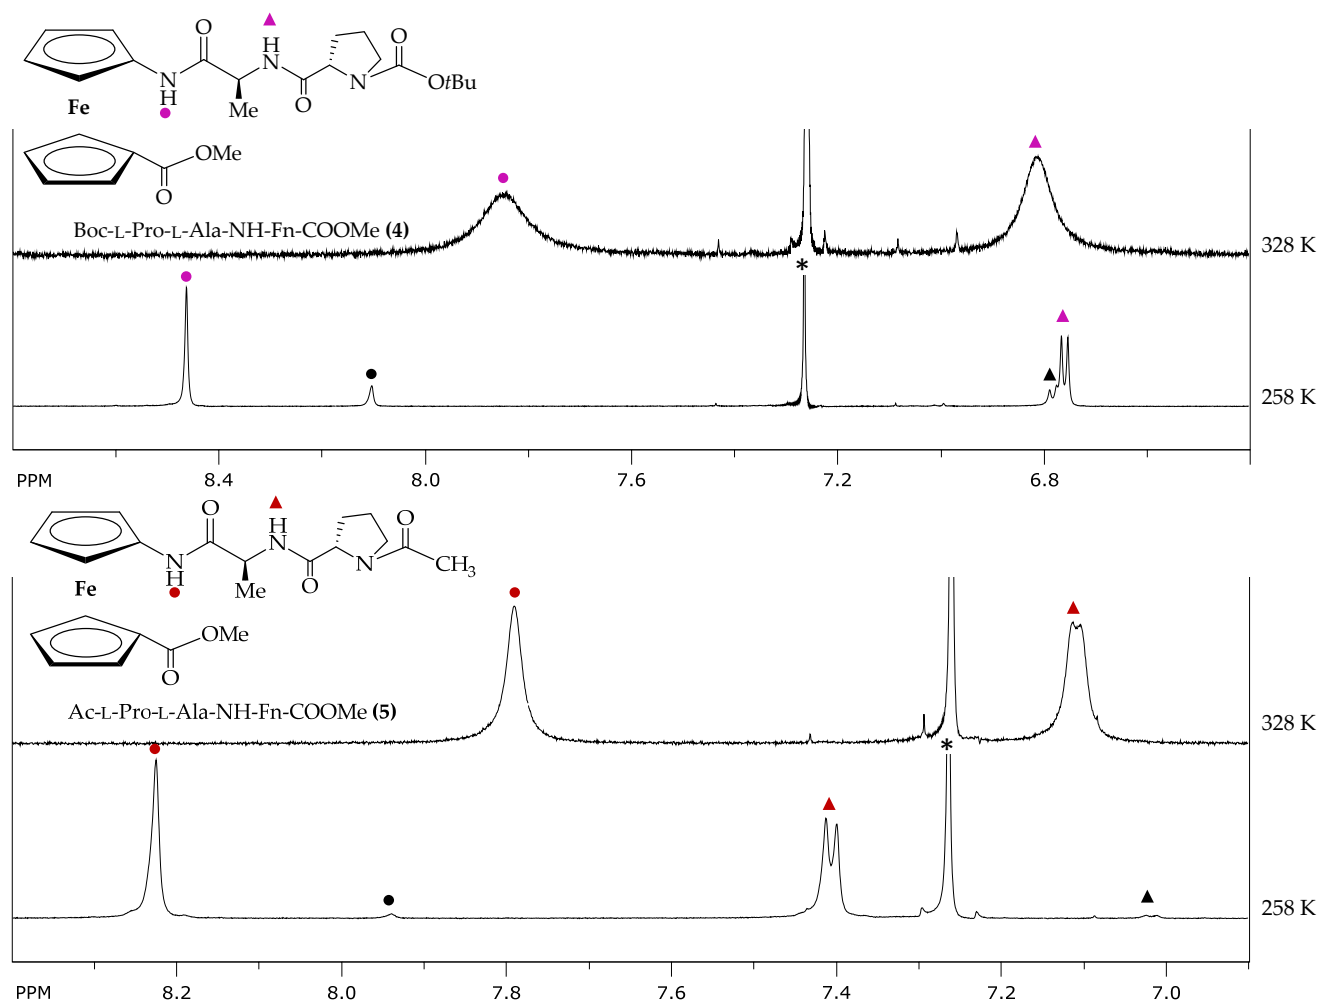

**Figure S50.** The influence of increased temperature on the *cis/trans* signals coalescence in peptides 2-5.



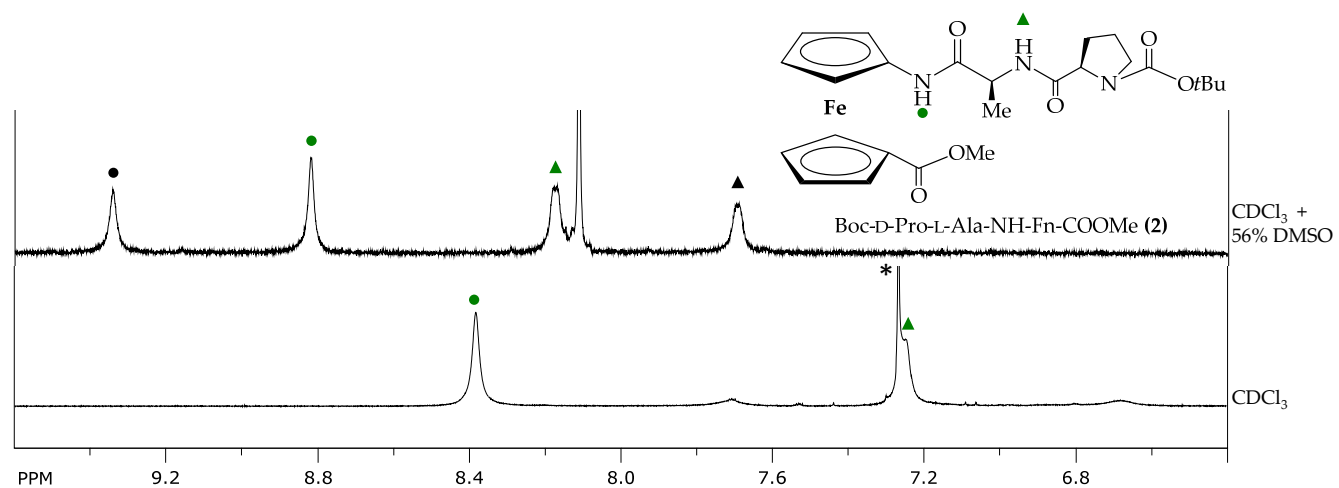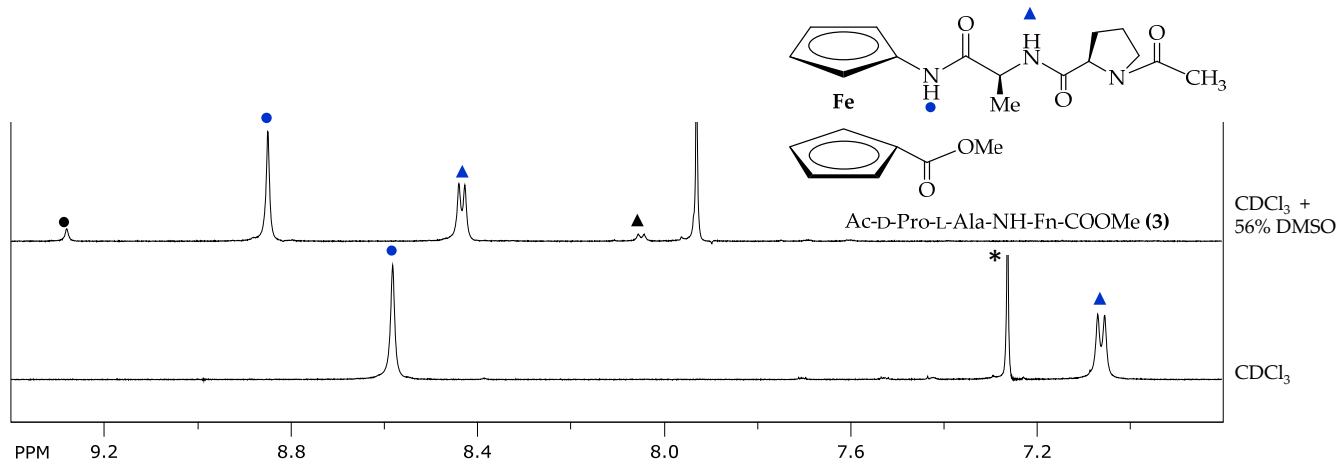

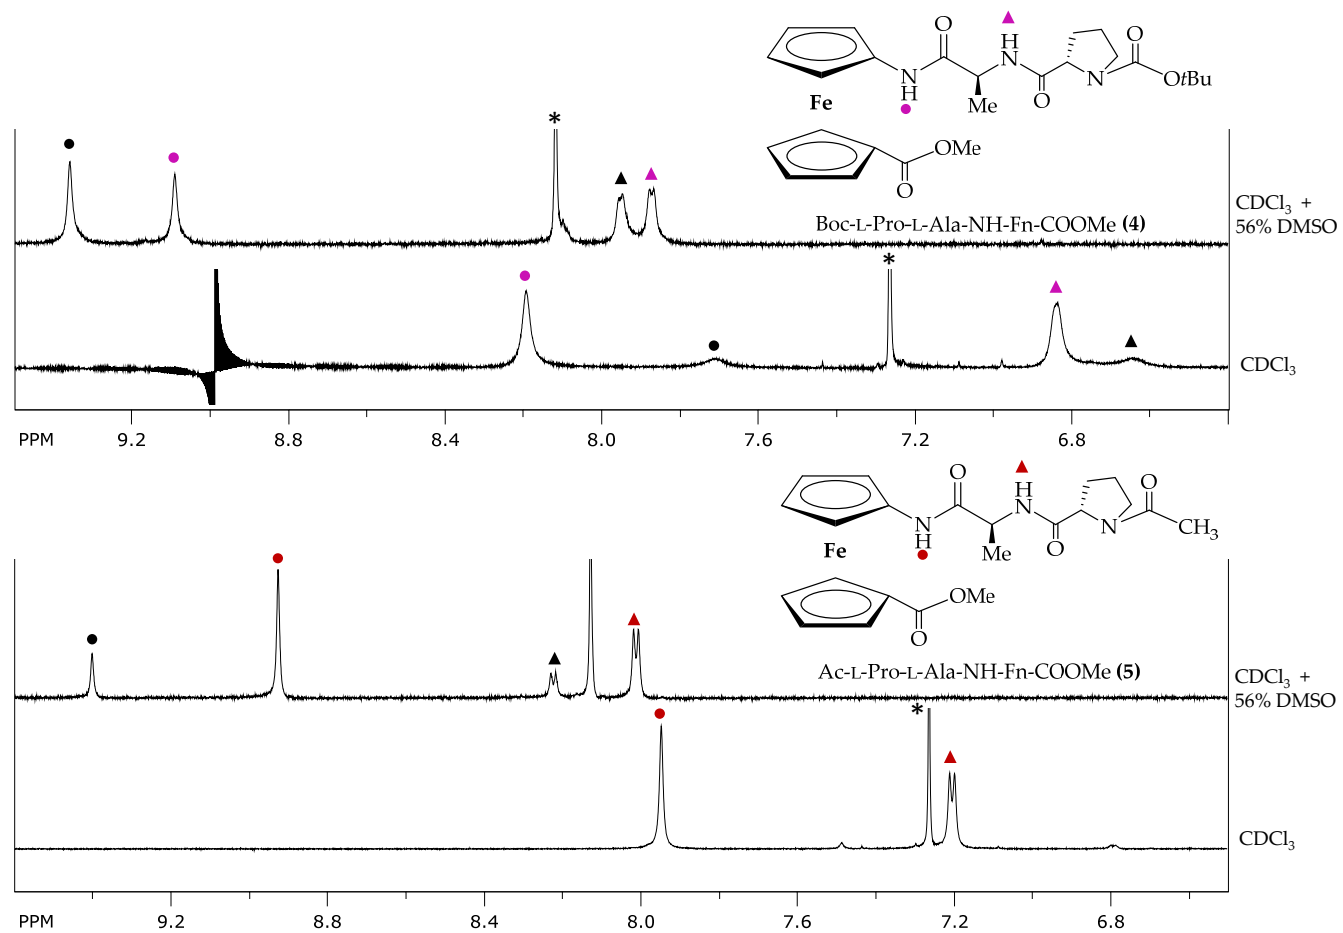

**Figure S51.** The influence of DMSO on *cis-trans* isomerization of a proline imide bond in peptides 2-5.

## X-ray crystal structure analysis

**Table S52.** Crystallographic, data collection and refinement data.

| Compound                                      | <b>2</b>                                                        | <b>5</b>                                                        | Compound                                                      | <b>2</b>                                                          | <b>5</b>                                                          |
|-----------------------------------------------|-----------------------------------------------------------------|-----------------------------------------------------------------|---------------------------------------------------------------|-------------------------------------------------------------------|-------------------------------------------------------------------|
| Empirical formula                             | C <sub>25</sub> H <sub>33</sub> FeN <sub>3</sub> O <sub>6</sub> | C <sub>22</sub> H <sub>26</sub> FeN <sub>3</sub> O <sub>6</sub> | $\Theta$ range / °                                            | 3.58 – 79.66                                                      | 2.75 – 76.27                                                      |
| Formula wt. / g mol <sup>-1</sup>             | 527.39                                                          | 484.31                                                          | <i>T</i> / K                                                  | 293(2)                                                            | 293(1)                                                            |
| Colour                                        | yellow                                                          | yellow                                                          | Diffractometer type                                           | Synergy S                                                         | Xcalibur Nova                                                     |
| Crystal dimensions / mm                       | 0.20 x 0.09 x 0.05                                              | 0.15 x 0.09 x 0.04                                              | Range of <i>h, k, l</i>                                       | -4 < <i>h</i> < 7;<br>-20 < <i>k</i> < 22;<br>-31 < <i>l</i> < 26 | -28 < <i>h</i> < 25;<br>-5 < <i>k</i> < 7;<br>-20 < <i>l</i> < 15 |
| Space group                                   | <i>P</i> 2 <sub>1</sub> 2 <sub>1</sub> 2 <sub>1</sub>           | <i>C</i> 2                                                      | Reflections collected                                         | 18409                                                             | 5290                                                              |
| <i>a</i> / Å                                  | 5.88390(10)                                                     | 22.3927(8)                                                      | Independent reflections                                       | 5486                                                              | 3415                                                              |
| <i>b</i> / Å                                  | 17.6280(2)                                                      | 6.2677(3)                                                       | Observed reflections ( <i>I</i> ≥ 2σ)                         | 5251                                                              | 2765                                                              |
| <i>c</i> / Å                                  | 24.6876(4)                                                      | 16.5434(7)                                                      | Absorption correction                                         | Multi-scan                                                        | Multi-scan                                                        |
| $\alpha$ / °                                  | 90                                                              | 90                                                              | <i>T</i> <sub>min</sub> , <i>T</i> <sub>max</sub>             | 0.1844; 1.0000                                                    | 0.2363; 1.0000                                                    |
| $\beta$ / °                                   | 90                                                              | 104.007(4)                                                      | <i>R</i> <sub>int</sub>                                       | 0.0314                                                            | 0.0862                                                            |
| $\gamma$ / °                                  | 90                                                              | 90                                                              | <i>R</i> ( <i>F</i> )                                         | 0.0293                                                            | 0.0702                                                            |
| <i>Z</i>                                      | 4                                                               | 4                                                               | <i>R</i> <sub>w</sub> ( <i>F</i> <sup>2</sup> )               | 0.0791                                                            | 0.1998                                                            |
| <i>V</i> / Å <sup>3</sup>                     | 2560.63(7)                                                      | 2252.84(17)                                                     | Goodness of fit                                               | 1.071                                                             | 1.019                                                             |
| <i>D</i> <sub>calc</sub> / g cm <sup>-3</sup> | 1.368                                                           | 1.475                                                           | H atom treatment                                              | Constrained                                                       | Constrained                                                       |
| $\lambda$ / Å                                 | 1.54179 (CuKα)                                                  | 1.54179 (CuKα)                                                  | No. of parameters                                             | 316                                                               | 280                                                               |
| $\mu$ / mm <sup>-1</sup>                      | 5.094                                                           | 5.742                                                           | No. of restraints                                             | 0                                                                 | 41                                                                |
|                                               |                                                                 |                                                                 | $\Delta\rho_{\max}$ , $\Delta\rho_{\min}$ (eÅ <sup>-3</sup> ) | 0.367; -0.371                                                     | 0.535; -0.623                                                     |

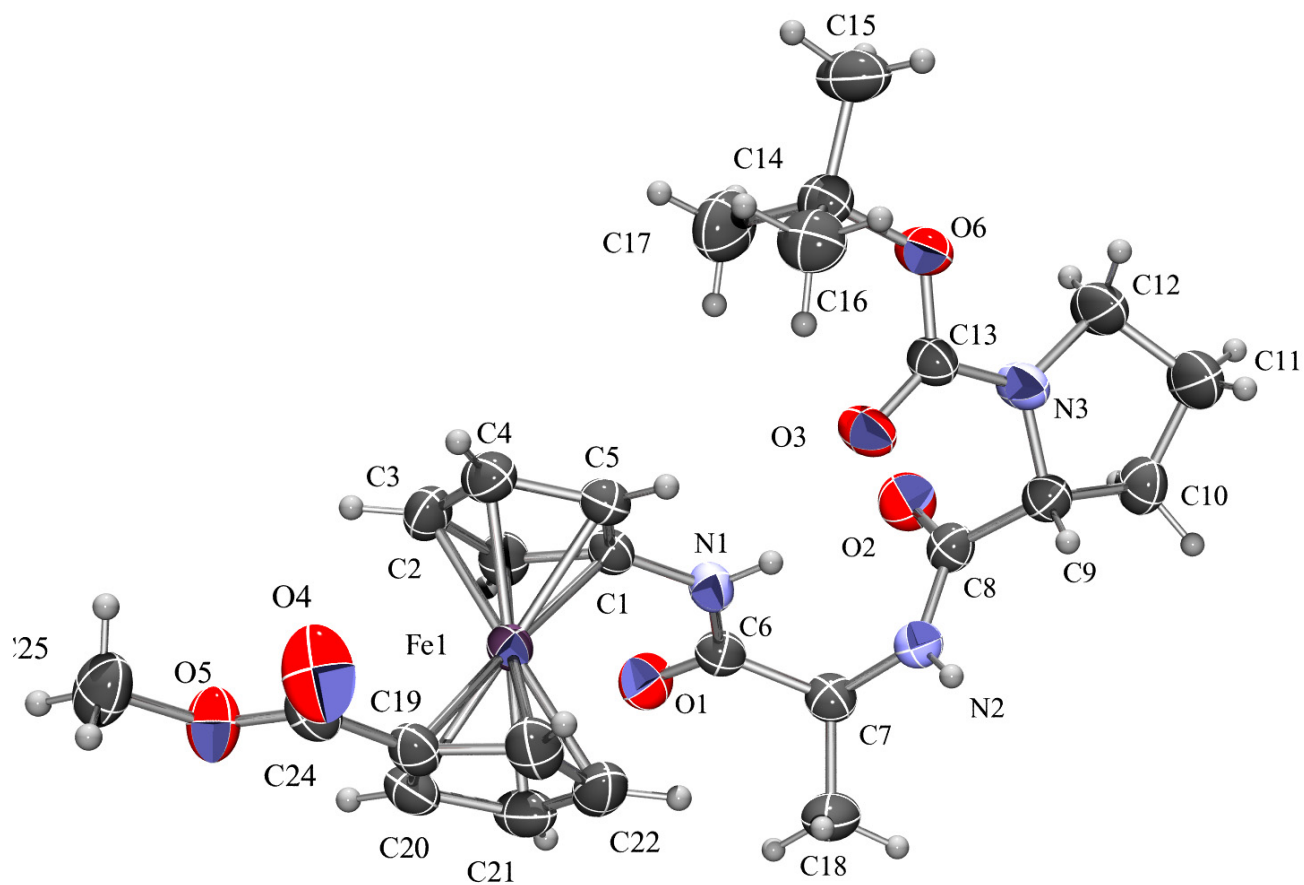

**Figure S53.** ORTEP-3 drawing of a molecule of **2**. Displacement ellipsoids are drawn for the probability of 50 % and hydrogen atoms are shown as spheres of arbitrary radii.

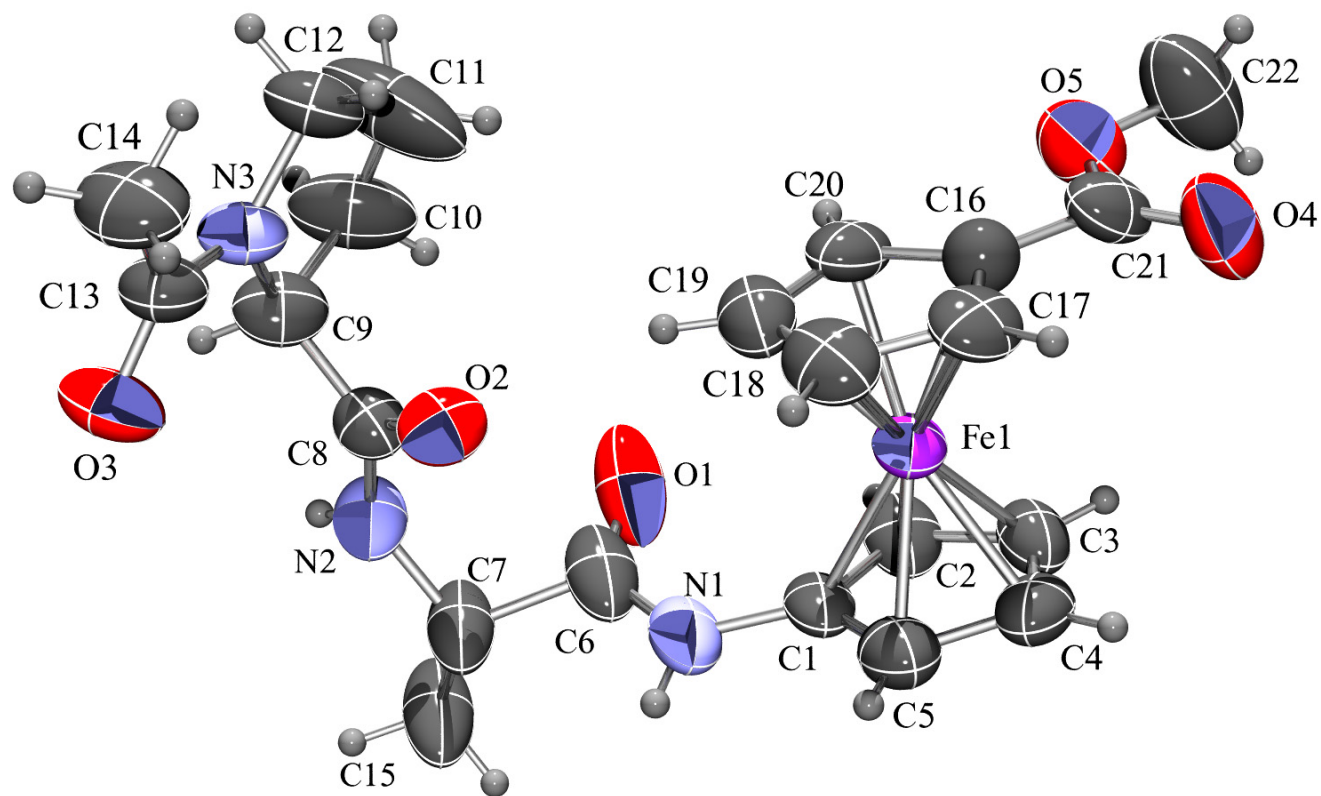

*Figure S54.* ORTEP-3 drawing of a molecule of **5**. Displacement ellipsoids are drawn for the probability of 50 % and hydrogen atoms are shown as spheres of arbitrary radii.

**Table S55.** Geometric parameters of hydrogen bonding (Å, °).

|                      | $D-H / \text{\AA}$ | $H \cdots A / \text{\AA}$ | $D \cdots A / \text{\AA}$ | $D-H \cdots A / ^\circ$ | Symm. op. on A       |
|----------------------|--------------------|---------------------------|---------------------------|-------------------------|----------------------|
| <b>2</b>             |                    |                           |                           |                         |                      |
| N1-H1 $\cdots$ O3    | 0.86               | 2.11                      | 2.898(3)                  | 151                     | $x, y, z$            |
| N1-H1 $\cdots$ N2    | 0.86               | 2.32                      | 2.749(3)                  | 111                     | $x, y, z$            |
| N2-H2 $\cdots$ O1    | 0.86               | 2.11                      | 2.954(3)                  | 168                     | $-1+x, y, z$         |
| C2-H2A $\cdots$ O1   | 0.93               | 2.51                      | 2.940(3)                  | 108                     | $x, y, z$            |
| C5-H5 $\cdots$ O3    | 0.93               | 2.80                      | 3.326(4)                  | 117                     | $x, y, z$            |
| C10-H10A $\cdots$ O2 | 0.97               | 2.55                      | 3.226(3)                  | 127                     | $-1+x, y, z$         |
| C16-H16B $\cdots$ O3 | 0.96               | 2.34                      | 2.961(3)                  | 122                     | $x, y, z$            |
| C17-H17C $\cdots$ O3 | 0.96               | 2.45                      | 3.048(4)                  | 120                     | $x, y, z$            |
| C4-H4 $\cdots$ O2    | 0.93               | 2.80                      | 3.598(4)                  | 144                     | $x, -1/2+y, 3/2-z$   |
| C23-H23 $\cdots$ O5  | 0.93               | 2.71                      | 3.442(4)                  | 136                     | $-1+x, y, z$         |
| C15-H15C $\cdots$ O5 | 0.96               | 2.79                      | 3.723(4)                  | 165                     | $1/2-x, -y, -1/2+z$  |
| <b>5</b>             |                    |                           |                           |                         |                      |
| N1-H1 $\cdots$ O6    | 0.86               | 1.95                      | 2.754(16)                 | 156                     | $x, y, z$            |
| N2-H2 $\cdots$ O3    | 0.86               | 2.01                      | 2.847(12)                 | 163                     | $1/2-x, -1/2+y, -z$  |
| C2-H2A $\cdots$ O1   | 0.93               | 2.59                      | 2.980(11)                 | 106                     | $x, y, z$            |
| C10-H10B $\cdots$ O2 | 0.97               | 2.53                      | 3.158(13)                 | 122                     | $x, -1+y, z$         |
| C15-H15C $\cdots$ O6 | 0.96               | 2.53                      | 3.37(2)                   | 145                     | $x, -1+y, z$         |
| C19-H19 $\cdots$ O2  | 0.93               | 2.42                      | 3.325(10)                 | 164                     | $x, y, z$            |
| C12-H12A $\cdots$ O4 | 0.96               | 2.68                      | 3.174(12)                 | 112                     | $1/2-x, -1/2+y, 1-z$ |
| C5-H5 $\cdots$ O1    | 0.93               | 2.71                      | 3.519(11)                 | 147                     | $x, 1+y, z$          |

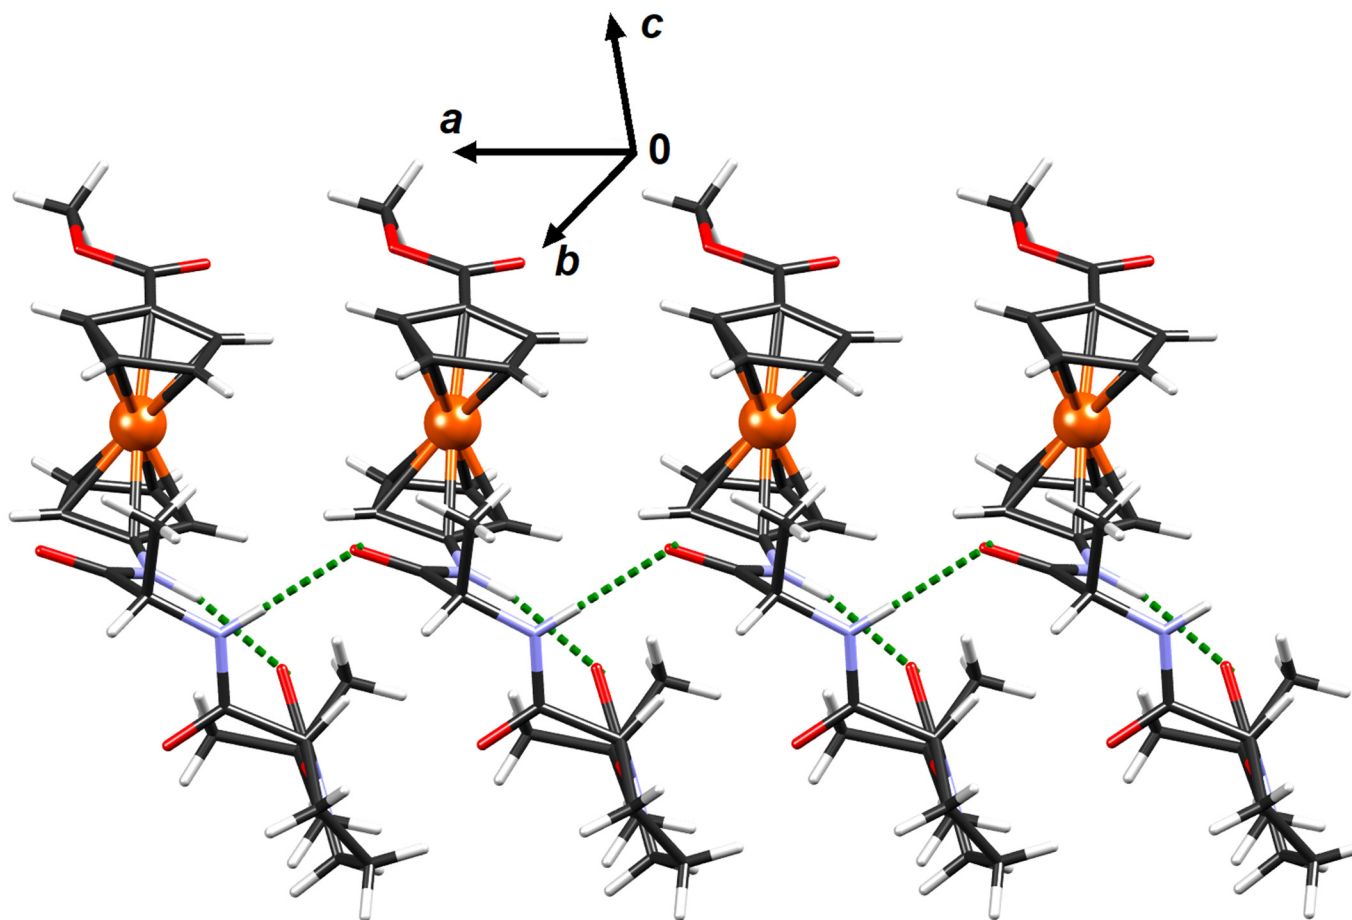

*Figure S56.* Hydrogen bonded chains in crystal packing of compound **2**. Hydrogen bonds are shown as dashed lines.

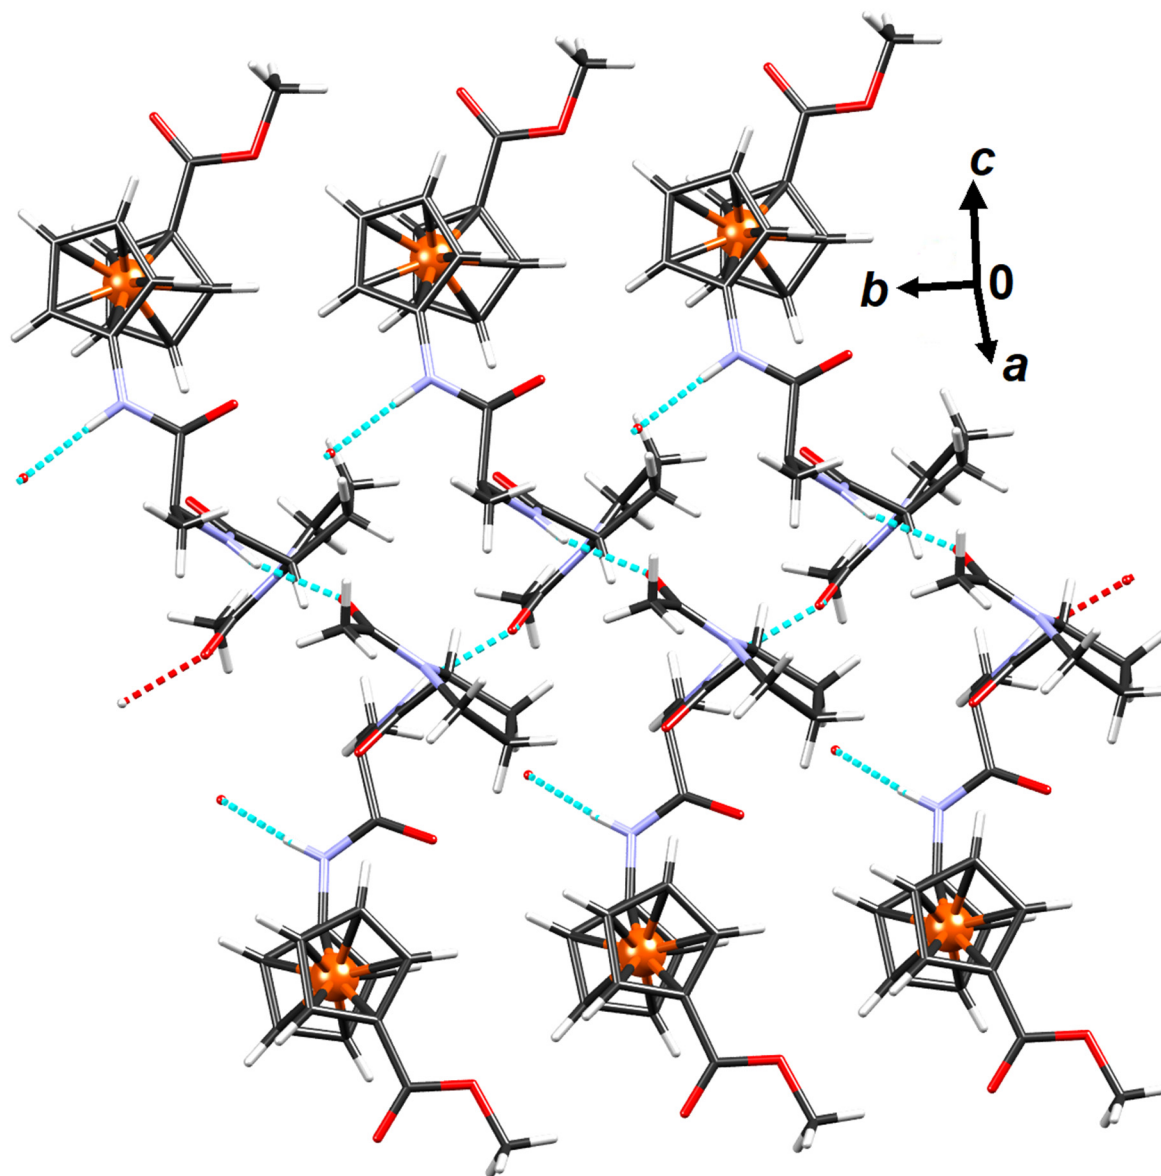

*Figure S57.* Hydrogen bonded chains in crystal packing of compound 5. Hydrogen bonds are shown as dashed lines.



## Biological evaluation

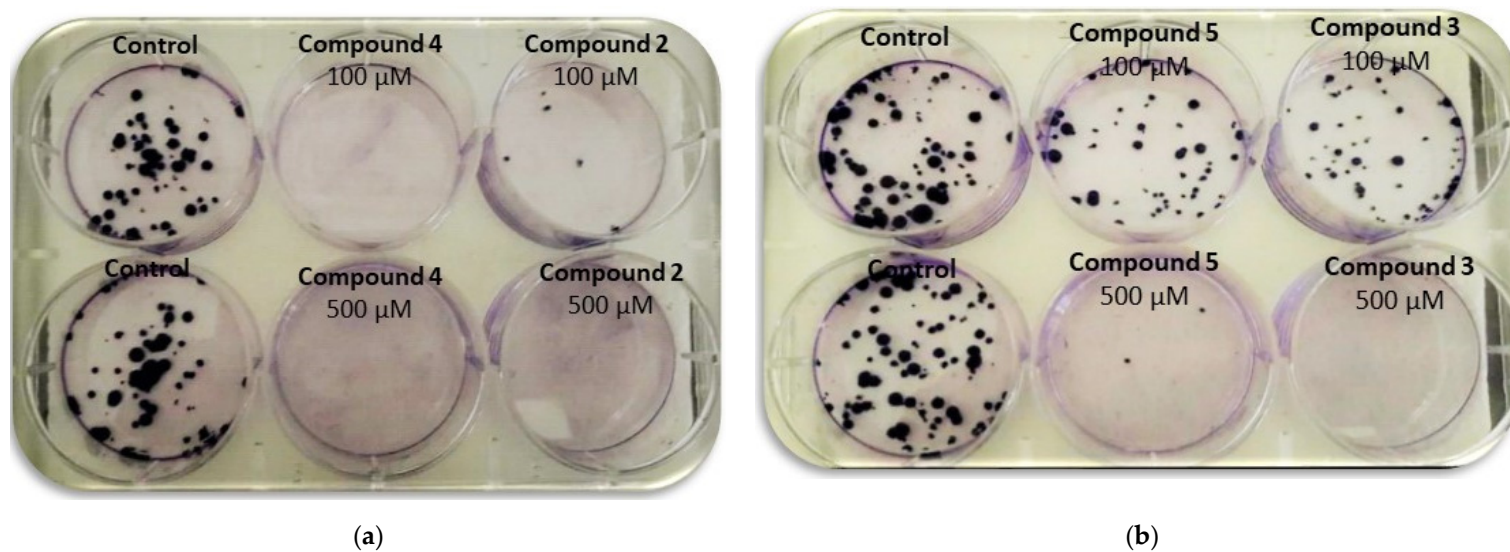

*Figure S58.* Results of clonogenic analysis after treatment with peptides 2-5 with two different concentrations [100  $\mu$ M (a) and 500  $\mu$ M (b)].
